# Supplementary material for: Elevated serum alpha-1 antitrypsin is a major component of GlycA-associated risk for future morbidity and mortality
Source: PLoS One. 2019 Oct 23;14(10):e0223692. doi: 10.1371/journal.pone.0223692 (PMC6808431; doi:10.1371/journal.pone.0223692)
Supplement: S1 Table — Derived ratios were excluded from the analyses (Methods). (XLSX) [file pone.0223692.s005.xlsx]

## Sheet: S1 Table
Name	Molecular Species	Units
Lipoprotein particles and their constituents
Chylomicrons and very low density lipoprotein (VLDL) particles
VLDL-D	Mean diameter for VLDL particles	nm
VLDL-C	Total cholesterol in VLDL	mmol/l
VLDL-TG	Triglycerides in VLDL	mmol/l
Low density lipoprotein (LDL) particles
LDL-D	Mean diameter for LDL particles	nm
LDL-C	Total cholesterol in LDL	mmol/l
LDL-TG	Triglycerides in LDL	mmol/l
High density lipoprotein (HDL) particles
HDL-D	Mean diameter for HDL particles	nm
HDL-C	Total cholesterol in HDL	mmol/l
HDL-TG	Triglycerides in HDL	mmol/l
Chylomicrons and extremely large VLDL particles (particle diameters > 75 nm)
XXL-VLDL-P	Total concentration of chylomicrons and extremely large VLDL particles	mol/l
XXL-VLDL-L	Total lipids in chylomicrons and extremely large VLDL	mmol/l
XXL-VLDL-PL	Phospholipids in chylomicrons and extremely large VLDL	mmol/l
XXL-VLDL-C	Total cholesterol in chylomicrons and extremely large VLDL	mmol/l
XXL-VLDL-CE	Cholesterol esters in chylomicrons and extremely large VLDL	mmol/l
XXL-VLDL-FC	Free cholesterol in chylomicrons and extremely large VLDL	mmol/l
XXL-VLDL-TG	Triglycerides in chylomicrons and extremely large VLDL	mmol/l
Very large VLDL particles (average particle diameter of 64 nm)
XL-VLDL-P	Total concentration of very large VLDL particles	mol/l
XL-VLDL-L	Total lipids in very large VLDL	mmol/l
XL-VLDL-PL	Phospholipids in very large VLDL	mmol/l
XL-VLDL-C	Total cholesterol in very large VLDL	mmol/l
XL-VLDL-CE	Cholesterol esters in very large VLDL	mmol/l
XL-VLDL-FC	Free cholesterol in very large VLDL	mmol/l
XL-VLDL-TG	Triglycerides in very large VLDL	mmol/l
Large VLDL particles (average particle diameter of 53.6 nm)
L-VLDL-P	Total concentration of large VLDL particles	mol/l
L-VLDL-L	Total lipids in large VLDL	mmol/l
L-VLDL-PL	Phospholipids in large VLDL	mmol/l
L-VLDL-C	Total cholesterol in large VLDL	mmol/l
L-VLDL-CE	Cholesterol esters in large VLDL	mmol/l
L-VLDL-FC	Free cholesterol in large VLDL	mmol/l
L-VLDL-TG	Triglycerides in large VLDL	mmol/l
Medium VLDL particles (average particle diameter of 44.5 nm)
M-VLDL-P	Total concentration of medium VLDL particles	mol/l
M-VLDL-L	Total lipids in medium VLDL	mmol/l
M-VLDL-PL	Phospholipids in medium VLDL	mmol/l
M-VLDL-C	Total cholesterol in medium VLDL	mmol/l
M-VLDL-CE	Cholesterol esters in medium VLDL	mmol/l
M-VLDL-FC	Free cholesterol in medium VLDL	mmol/l
M-VLDL-TG	Triglycerides in medium VLDL	mmol/l
Small VLDL particles (average particle diameter of 36.8 nm)
S-VLDL-P	Total concentration of small VLDL particles	mol/l
S-VLDL-L	Total lipids in small VLDL	mmol/l
S-VLDL-PL	Phospholipids in small VLDL	mmol/l
S-VLDL-C	Total cholesterol in small VLDL	mmol/l
S-VLDL-CE	Cholesterol esters in small VLDL	mmol/l
S-VLDL-FC	Free cholesterol in small VLDL	mmol/l
S-VLDL-TG	Triglycerides in small VLDL	mmol/l
Very small VLDL particles (average particle diameter of 31.3 nm)
XS-VLDL-P	Total concentration of very small VLDL particles	mol/l
XS-VLDL-L	Total lipids in very small VLDL	mmol/l
XS-VLDL-PL	Phospholipids in very small VLDL	mmol/l
XS-VLDL-C	Total cholesterol in very small VLDL	mmol/l
XS-VLDL-CE	Cholesterol esters in very small VLDL	mmol/l
XS-VLDL-FC	Free cholesterol in very small VLDL	mmol/l
XS-VLDL-TG	Triglycerides in very small VLDL	mmol/l
Intermediate density lipoprotein particles (average particle diameter of 28.6 nm)
IDL-P	Total concentration of IDL particles	mol/l
IDL-L	Total lipids in IDL	mmol/l
IDL-PL	Phospholipids in IDL	mmol/l
IDL-C	Total cholesterol in IDL	mmol/l
IDL-CE	Cholesterol esters in IDL	mmol/l
IDL-FC	Free cholesterol in IDL	mmol/l
IDL-TG	Triglycerides in IDL	mmol/l
Large LDL particles (average particle diameter of 25.5 nm)
L-LDL-P	Total concentration of large LDL particles	mol/l
L-LDL-L	Total lipids in large LDL	mmol/l
L-LDL-PL	Phospholipids in large LDL	mmol/l
L-LDL-C	Total cholesterol in large LDL	mmol/l
L-LDL-CE	Cholesterol esters in large LDL	mmol/l
L-LDL-FC	Free cholesterol in large LDL	mmol/l
L-LDL-TG	Triglycerides in large LDL	mmol/l
Medium LDL particles (average particle diameter of 23.0 nm)
M-LDL-P	Total concentration of medium LDL particles	mol/l
M-LDL-L	Total lipids in medium LDL	mmol/l
M-LDL-PL	Phospholipids in medium LDL	mmol/l
M-LDL-C	Total cholesterol in medium LDL	mmol/l
M-LDL-CE	Cholesterol esters in medium LDL	mmol/l
M-LDL-FC	Free cholesterol in medium LDL	mmol/l
M-LDL-TG	Triglycerides in medium LDL	mmol/l
Small LDL particles (average particle diameter of 18.7 nm)
S-LDL-P	Total concentration of small LDL particles	mol/l
S-LDL-L	Total lipids in small LDL	mmol/l
S-LDL-PL	Phospholipids in small LDL	mmol/l
S-LDL-C	Total cholesterol in small LDL	mmol/l
S-LDL-CE	Cholesterol esters in small LDL	mmol/l
S-LDL-FC	Free cholesterol in small LDL	mmol/l
S-LDL-TG	Triglycerides in small LDL	mmol/l
Very large HDL particles (average particle diameter of 14.3 nm)
XL-HDL-P	Total concentration of very large HDL particles	mol/l
XL-HDL-L	Total lipids in very large HDL	mmol/l
XL-HDL-PL	Phospholipids in very large HDL	mmol/l
XL-HDL-C	Total cholesterol in very large HDL	mmol/l
XL-HDL-CE	Cholesterol esters in very large HDL	mmol/l
XL-HDL-FC	Free cholesterol in very large HDL	mmol/l
XL-HDL-TG	Triglycerides in very large HDL	mmol/l
Large HDL particles (average particle diameter of 12.1 nm)
L-HDL-P	Total concentration of large HDL particles	mol/l
L-HDL-L	Total lipids in large HDL	mmol/l
L-HDL-PL	Phospholipids in large HDL	mmol/l
L-HDL-C	Total cholesterol in large HDL	mmol/l
L-HDL-CE	Cholesterol esters in large HDL	mmol/l
L-HDL-FC	Free cholesterol in large HDL	mmol/l
L-HDL-TG	Triglycerides in large HDL	mmol/l
Medium HDL particles (average particle diameter of 10.9 nm)
M-HDL-P	Concentration of medium HDL particles	mol/l
M-HDL-L	Total lipids in medium HDL	mmol/l
M-HDL-PL	Phospholipids in medium HDL	mmol/l
M-HDL-C	Total cholesterol in medium HDL	mmol/l
M-HDL-CE	Cholesterol esters in medium HDL	mmol/l
M-HDL-FC	Free cholesterol in medium HDL	mmol/l
M-HDL-TG	Triglycerides in medium HDL	mmol/l
Small HDL particles (average particle diameter of 8.7 nm)
S-HDL-P	Concentration of small HDL particles	mol/l
S-HDL-L	Total lipids in small HDL	mmol/l
S-HDL-PL	Phospholipids in small HDL	mmol/l
S-HDL-C	Total cholesterol in small HDL	mmol/l
S-HDL-CE	Cholesterol esters in small HDL	mmol/l
S-HDL-FC	Free cholesterol in small HDL	mmol/l
S-HDL-TG	Triglycerides in small HDL	mmol/l
HDL2 fraction (1.063–1.125 g/mL)
HDL2-C	Cholesterol in the HDL2 fraction	mmol/l
HDL3 fraction (1.125–1.210 g/mL)
HDL3-C	Cholesterol in the HDL3 fraction	mmol/l
Cholesterol
Serum-C	Total cholesterol in serum	mmol/l
EstC	Esterified cholesterol	mmol/l
FreeC	Free cholesterol	mmol/l
Remnant-C	Remnant cholesterol (non-HDL, non-LDL -cholesterol)	mmol/l
Glycerides and phospholipids
Serum-TG	Total triglycerides in serum	mmol/l
TotPG	Total phosphoglycerides	mmol/l
PC	Phosphatidylcholine and other cholines	mmol/l
SM	Sphingomyelins	mmol/l
TotCho	Total cholines	mmol/l
Apolipoproteins
ApoA1	Apolipoprotein A-I	g/l
ApoB	Apolipoprotein B	g/l
Fatty acids and saturation
TotFA	Total fatty acids	mmol/l
UnSat	Estimated degree of fatty acid unsaturation	%
FAw3	Omega-3 fatty acids	mmol/l
FAw6	Omega-6 fatty acids	mmol/l
PUFA	Polyunsaturated fatty acids	mmol/l
MUFA	Monounsaturated fatty acids; 16:1, 18:1	mmol/l
SFA	Saturated fatty acids	mmol/l
DHA	Docosahexaenoic acid; 22:6	mmol/l
LA	Linoleic acid; 18:2	mmol/l
Amino acids
Ala	Alanine	mmol/l
Gln	Glutamine	mmol/l
Gly	Glycine	mmol/l
His	Histidine	mmol/l
Ile	Isoleucine	mmol/l
Leu	Leucine	mmol/l
Val	Valine	mmol/l
Phe	Phenylalanine	mmol/l
Tyr	Tyrosine	mmol/l
Glycolysis related metabolites
Glc	Glucose	mmol/l
Lac	Lactate	mmol/l
Pyr	Pyruvate	mmol/l
Cit	Citrate	mmol/l
Glol	Glycerol	mmol/l
Ketone bodies
Ace	Acetate	mmol/l
AcAce	Acetoacetate	mmol/l
bOHBut	3-hydroxybutyrate	mmol/l
Fluid balance
Crea	Creatinine	mmol/l
Alb	Albumin	signal area
Inflammation
GlycA	Glycoprotein acetyls, specifically the total concentration of mobile N-acetyl methyl groups of the N-Acetylglucosamine (GlcNAc) residues residing on the antenarry branches of glycoproteins in circulation	mmol/l
