# Supplementary material for: Elevated serum alpha-1 antitrypsin is a major component of GlycA-associated risk for future morbidity and mortality
Source: PLoS One. 2019 Oct 23;14(10):e0223692. doi: 10.1371/journal.pone.0223692 (PMC6808431; doi:10.1371/journal.pone.0223692)
Supplement: S3 Table — Rows are organised by biomarker, then by ICD10 diagnosis, then by the cohort the association between the biomarker and ICD10 diagnosis was tested in. ICD10: The code for the diagnosis or range of codes for the diagnosis category. Diagnosis: name of the ICD10 diagnosis or diagnosis category. Cohort: association test cohort; “Meta-analysis”: meta-analysis of the hazard ratios calculated in the DILGOM07 and FINRISK97 cohorts; “FINRISK97”: samples in FINRISK97 for which each glycoprotein was successfully imputed (or for GlycA all samples with NMR metabolite measurements); “DILGOM07”: samples in DILGOM07 for which each glycoprotein was successfully imputed (or for GlycA all samples with NMR metabolite measurements); “Immunoassay”: association between the glycoprotein measured by immunoassay in the subset of DILGOM07 with immunoassay measurements; “Training”: association between the imputed glycoprotein in the subset of DILGOM07 used to train each imputation model (i.e. with complete NMR data and immunoassay measurements). Samples: the number of samples in each cohort for that biomarker. Events: the number of people diagnosed with that ICD10 code in the 8-year follow-up period. ICD10 diagnoses with < 20 events in each sub-cohort could not be analysed. Prevalent: the number of people diagnosed with that ICD10 code in the 10-year follow-up period; Cox proportional hazard models were adjusted for prevalent cases where there were > 10 prevalent cases. HR: Cox proportional hazard ratio between the biomarker and the ICD10 diagnosis in the corresponding sub-cohort. Models were fit using age as the time scale and adjusting for sex, smoking status, BMI, blood pressure, alcohol consumption, prevalent cases, and previously identified biomarkers for 5-year risk of all-cause mortality (citrate, albumin, and VLDL particle size). SE: standard error of the hazard ratio. 95% CI: 95% confidence interval. P: P-value. FDR: Storery-Tibshirani adjusted P-value. FDR correction was performed acr [file pone.0223692.s007.xlsx]

## Sheet: S4 Table
Biomarker	ICD10	Diagnosis	Cohort	Samples	Events	Prevalent	HR	SE	95% CI	P	FDR	Sig	SigRep
AAT	A00-A09	Intestinal infectious diseases	Meta-analysis	12281	190	215	1.37831	0.0661839	[1.21, 1.57]	1.24747e-06	1.64211e-05	TRUE	TRUE
AAT	A00-A09	Intestinal infectious diseases	FINRISK97	7512	112	87	1.35	0.0862	[1.14, 1.60]	0.000449031	0.00426966	TRUE	TRUE
AAT	A00-A09	Intestinal infectious diseases	DILGOM07	4769	78	128	1.42	0.1033	[1.16, 1.74]	0.000675465	0.00583386	TRUE	TRUE
AAT	A09	Infectious gastroenteritis and colitis, unspecified	Meta-analysis	12281	146	137	1.41296	0.0735987	[1.22, 1.63]	2.64157e-06	2.8636e-05	TRUE	TRUE
AAT	A09	Infectious gastroenteritis and colitis, unspecified	FINRISK97	7512	82	51	1.36	0.0994	[1.12, 1.65]	0.00198833	0.0160013	TRUE	TRUE
AAT	A09	Infectious gastroenteritis and colitis, unspecified	DILGOM07	4769	64	86	1.48	0.1095	[1.19, 1.83]	0.00034473	0.00344679	TRUE	TRUE
AAT	A30-A49	Other bacterial diseases	Meta-analysis	12281	324	143	1.11568	0.0581324	[1.00, 1.25]	0.0596889	0.0973451	FALSE	FALSE
AAT	A30-A49	Other bacterial diseases	FINRISK97	7512	162	49	1.08	0.0837	[0.91, 1.27]	0.381319	0.360683	FALSE	FALSE
AAT	A30-A49	Other bacterial diseases	DILGOM07	4769	162	94	1.15	0.0808	[0.98, 1.35]	0.0768964	0.167929	FALSE	FALSE
AAT	A30-A49	Other bacterial diseases	Training	615	23	<10	1.26	0.254523	[0.77, 2.05]	0.363869	0.523061	FALSE	FALSE
AAT	A30-A49	Other bacterial diseases	Immunoassayed	630	23	<10	0.92	0.254663	[0.57, 1.50]	0.743351	0.746664	FALSE	FALSE
AAT	A41	Other septicaemia	Meta-analysis	12281	64	18	1.30751	0.116268	[1.04, 1.64]	0.0211069	0.048622	FALSE	FALSE
AAT	A41	Other septicaemia	FINRISK97	7512	37	7	1.21	0.1588	[0.89, 1.65]	0.231694	0.316115	FALSE	FALSE
AAT	A41	Other septicaemia	DILGOM07	4769	27	11	1.43	0.1707	[1.02, 2.00]	0.0358114	0.0957606	FALSE	FALSE
AAT	A46	Erysipelas	Meta-analysis	12281	207	105	1.02974	0.0745211	[0.89, 1.19]	0.694093	0.45833	FALSE	FALSE
AAT	A46	Erysipelas	FINRISK97	7512	118	39	0.99	0.1007	[0.81, 1.20]	0.885694	0.481991	FALSE	FALSE
AAT	A46	Erysipelas	DILGOM07	4769	89	66	1.08	0.1108	[0.87, 1.34]	0.479247	0.484992	FALSE	FALSE
AAT	A50-A64	Infections with a predominantly sexual mode of transmission	Meta-analysis	12281	81	52	1.0844	0.113272	[0.87, 1.35]	0.474405	0.376843	FALSE	FALSE
AAT	A50-A64	Infections with a predominantly sexual mode of transmission	FINRISK97	7512	40	4	1.11	0.1612	[0.81, 1.53]	0.505559	0.423732	FALSE	FALSE
AAT	A50-A64	Infections with a predominantly sexual mode of transmission	DILGOM07	4769	41	48	1.06	0.1592	[0.78, 1.45]	0.694177	0.577018	FALSE	FALSE
AAT	A63	Other predominantly sexually transmitted diseases not elsewhere classified	Meta-analysis	12281	51	26	0.87609	0.15271	[0.65, 1.18]	0.386345	0.341146	FALSE	FALSE
AAT	A63	Other predominantly sexually transmitted diseases not elsewhere classified	FINRISK97	7512	26	0	0.89	0.2077	[0.59, 1.34]	0.588415	0.443039	FALSE	FALSE
AAT	A63	Other predominantly sexually transmitted diseases not elsewhere classified	DILGOM07	4769	25	26	0.86	0.2253	[0.55, 1.34]	0.501154	0.486823	FALSE	FALSE
AAT	B00-B09	Viral infections characterised by skin and mucous membrane lesions	Meta-analysis	12281	102	74	1.02706	0.102072	[0.84, 1.25]	0.79363	0.474241	FALSE	FALSE
AAT	B00-B09	Viral infections characterised by skin and mucous membrane lesions	FINRISK97	7512	45	26	1.07	0.1397	[0.81, 1.41]	0.62017	0.446463	FALSE	FALSE
AAT	B00-B09	Viral infections characterised by skin and mucous membrane lesions	DILGOM07	4769	57	48	0.98	0.1495	[0.73, 1.32]	0.903596	0.629687	FALSE	FALSE
AAT	C15-C26	Malignant neoplasms of digestive organs	Meta-analysis	12281	146	32	1.36614	0.081323	[1.16, 1.60]	0.000124846	0.000704339	TRUE	FALSE
AAT	C15-C26	Malignant neoplasms of digestive organs	FINRISK97	7512	85	11	1.53	0.099	[1.26, 1.86]	1.49843e-05	0.000285076	TRUE	FALSE
AAT	C15-C26	Malignant neoplasms of digestive organs	DILGOM07	4769	61	21	1.08	0.1426	[0.82, 1.43]	0.575426	0.527205	FALSE	FALSE
AAT	C18	Malignant neoplasm of colon	Meta-analysis	12281	53	10	1.40478	0.133061	[1.08, 1.82]	0.0106388	0.0301633	FALSE	FALSE
AAT	C18	Malignant neoplasm of colon	FINRISK97	7512	28	4	1.52	0.1776	[1.07, 2.15]	0.0181505	0.0862931	FALSE	FALSE
AAT	C18	Malignant neoplasm of colon	DILGOM07	4769	25	6	1.27	0.2009	[0.86, 1.88]	0.234796	0.33659	FALSE	FALSE
AAT	C30-C39	Malignant neoplasm of respiratory and intrathoracic organs	Meta-analysis	12281	74	11	1.4467	0.101838	[1.18, 1.77]	0.000287645	0.00139499	TRUE	FALSE
AAT	C30-C39	Malignant neoplasm of respiratory and intrathoracic organs	FINRISK97	7512	51	6	1.36	0.1226	[1.07, 1.73]	0.0126097	0.0670034	FALSE	FALSE
AAT	C30-C39	Malignant neoplasm of respiratory and intrathoracic organs	DILGOM07	4769	23	5	1.66	0.1829	[1.16, 2.38]	0.00551359	0.0239234	FALSE	FALSE
AAT	C43-C44	Melanoma and other malignant neoplasms of skin	Meta-analysis	12281	169	61	1.13632	0.0832938	[0.97, 1.34]	0.124972	0.16334	FALSE	FALSE
AAT	C43-C44	Melanoma and other malignant neoplasms of skin	FINRISK97	7512	66	14	1.04	0.1293	[0.81, 1.34]	0.766732	0.469708	FALSE	FALSE
AAT	C43-C44	Melanoma and other malignant neoplasms of skin	DILGOM07	4769	103	47	1.21	0.1089	[0.97, 1.49]	0.085145	0.178004	FALSE	FALSE
AAT	C44	Other malignant neoplasms of skin	Meta-analysis	12281	134	41	1.06379	0.0945972	[0.88, 1.28]	0.513313	0.394158	FALSE	FALSE
AAT	C44	Other malignant neoplasms of skin	FINRISK97	7512	46	9	0.86	0.1573	[0.63, 1.17]	0.330198	0.352987	FALSE	FALSE
AAT	C44	Other malignant neoplasms of skin	DILGOM07	4769	88	32	1.2	0.1184	[0.95, 1.51]	0.130614	0.233515	FALSE	FALSE
AAT	C50-C50	Malignant neoplasm of breast	Meta-analysis	12281	160	92	1.03919	0.0914761	[0.87, 1.24]	0.674315	0.44701	FALSE	FALSE
AAT	C50-C50	Malignant neoplasm of breast	FINRISK97	7512	81	29	1.03	0.1247	[0.81, 1.32]	0.79557	0.469708	FALSE	FALSE
AAT	C50-C50	Malignant neoplasm of breast	DILGOM07	4769	79	63	1.05	0.1346	[0.81, 1.36]	0.726514	0.577018	FALSE	FALSE
AAT	C50	Malignant neoplasm of breast	Meta-analysis	12281	160	92	1.03919	0.0914761	[0.87, 1.24]	0.674315	0.44701	FALSE	FALSE
AAT	C50	Malignant neoplasm of breast	FINRISK97	7512	81	29	1.03	0.1247	[0.81, 1.32]	0.79557	0.469708	FALSE	FALSE
AAT	C50	Malignant neoplasm of breast	DILGOM07	4769	79	63	1.05	0.1346	[0.81, 1.36]	0.726514	0.577018	FALSE	FALSE
AAT	C60-C63	Malignant neoplasms of male genital organs	Meta-analysis	12281	174	42	1.01203	0.0798608	[0.87, 1.18]	0.880973	0.493476	FALSE	FALSE
AAT	C60-C63	Malignant neoplasms of male genital organs	FINRISK97	7512	101	13	0.96	0.1075	[0.77, 1.18]	0.672502	0.458478	FALSE	FALSE
AAT	C60-C63	Malignant neoplasms of male genital organs	DILGOM07	4769	73	29	1.08	0.1193	[0.86, 1.37]	0.501713	0.486823	FALSE	FALSE
AAT	C61	Malignant neoplasm of prostate	Meta-analysis	12281	170	39	1.03172	0.0800698	[0.88, 1.21]	0.696548	0.45833	FALSE	FALSE
AAT	C61	Malignant neoplasm of prostate	FINRISK97	7512	99	12	0.98	0.1075	[0.79, 1.21]	0.822025	0.476704	FALSE	FALSE
AAT	C61	Malignant neoplasm of prostate	DILGOM07	4769	71	27	1.1	0.12	[0.87, 1.39]	0.446458	0.468814	FALSE	FALSE
AAT	C64-C68	Malignant neoplasm of urinary tract	Meta-analysis	12281	63	28	1.34613	0.125489	[1.05, 1.72]	0.0178544	0.0438715	FALSE	FALSE
AAT	C64-C68	Malignant neoplasm of urinary tract	FINRISK97	7512	38	12	1.39	0.1445	[1.04, 1.84]	0.0240205	0.104147	FALSE	FALSE
AAT	C64-C68	Malignant neoplasm of urinary tract	DILGOM07	4769	25	16	1.22	0.2531	[0.74, 2.00]	0.431399	0.459293	FALSE	FALSE
AAT	C81-C96	Malignant neoplasm of lymphoid haematopoietic and related tissue	Meta-analysis	12281	80	23	1.07865	0.120255	[0.85, 1.37]	0.528945	0.39837	FALSE	FALSE
AAT	C81-C96	Malignant neoplasm of lymphoid haematopoietic and related tissue	FINRISK97	7512	49	8	1.09	0.1521	[0.81, 1.47]	0.570065	0.443039	FALSE	FALSE
AAT	C81-C96	Malignant neoplasm of lymphoid haematopoietic and related tissue	DILGOM07	4769	31	15	1.06	0.1964	[0.72, 1.56]	0.770951	0.593802	FALSE	FALSE
AAT	D00-D09	In situ neoplasms	Meta-analysis	12281	54	25	1.08275	0.14449	[0.82, 1.44]	0.582137	0.420545	FALSE	FALSE
AAT	D00-D09	In situ neoplasms	FINRISK97	7512	25	7	0.95	0.2132	[0.62, 1.44]	0.791704	0.469708	FALSE	FALSE
AAT	D00-D09	In situ neoplasms	DILGOM07	4769	29	18	1.21	0.1965	[0.82, 1.77]	0.341558	0.412461	FALSE	FALSE
AAT	D10-D36	Benign neoplasms	Meta-analysis	12281	938	900	1.08982	0.0350519	[1.02, 1.17]	0.0141365	0.0383117	FALSE	FALSE
AAT	D10-D36	Benign neoplasms	FINRISK97	7512	547	322	1.05	0.0456	[0.96, 1.14]	0.31413	0.346048	FALSE	FALSE
AAT	D10-D36	Benign neoplasms	DILGOM07	4769	391	578	1.15	0.0548	[1.03, 1.28]	0.0109738	0.0419187	FALSE	FALSE
AAT	D10-D36	Benign neoplasms	Training	615	50	<10	1.27	0.138761	[0.97, 1.67]	0.0849787	0.229942	FALSE	FALSE
AAT	D10-D36	Benign neoplasms	Immunoassayed	630	50	<10	1.37	0.148288	[1.02, 1.83]	0.0337567	0.247026	FALSE	FALSE
AAT	D12	Benign neoplasm of colon rectum anus and anal canal	Meta-analysis	12281	202	54	1.12094	0.072985	[0.97, 1.29]	0.117762	0.157262	FALSE	FALSE
AAT	D12	Benign neoplasm of colon rectum anus and anal canal	FINRISK97	7512	101	5	1.03	0.1009	[0.84, 1.25]	0.789737	0.469708	FALSE	FALSE
AAT	D12	Benign neoplasm of colon rectum anus and anal canal	DILGOM07	4769	101	49	1.23	0.1057	[1.00, 1.51]	0.0519662	0.130158	FALSE	FALSE
AAT	D17	Benign lipomatous neoplasm	Meta-analysis	12281	93	64	1.02183	0.113844	[0.82, 1.28]	0.849519	0.47971	FALSE	FALSE
AAT	D17	Benign lipomatous neoplasm	FINRISK97	7512	50	20	1	0.1525	[0.74, 1.34]	0.976786	0.504199	FALSE	FALSE
AAT	D17	Benign lipomatous neoplasm	DILGOM07	4769	43	44	1.05	0.1711	[0.75, 1.47]	0.77868	0.593802	FALSE	FALSE
AAT	D22	Melanocytic naevi	Meta-analysis	12281	53	25	1.08513	0.142137	[0.82, 1.43]	0.565446	0.413514	FALSE	FALSE
AAT	D22	Melanocytic naevi	FINRISK97	7512	28	2	0.96	0.2033	[0.64, 1.42]	0.82666	0.476704	FALSE	FALSE
AAT	D22	Melanocytic naevi	DILGOM07	4769	25	23	1.22	0.1988	[0.82, 1.80]	0.323344	0.399775	FALSE	FALSE
AAT	D23	Other benign neoplasms of skin	Meta-analysis	12281	110	74	0.986407	0.103019	[0.81, 1.21]	0.894312	0.494931	FALSE	FALSE
AAT	D23	Other benign neoplasms of skin	FINRISK97	7512	60	11	0.97	0.1347	[0.74, 1.26]	0.812458	0.473489	FALSE	FALSE
AAT	D23	Other benign neoplasms of skin	DILGOM07	4769	50	63	1.01	0.1599	[0.74, 1.38]	0.947607	0.644697	FALSE	FALSE
AAT	D25	Leiomyoma of uterus	Meta-analysis	12281	249	442	0.977331	0.0699168	[0.85, 1.12]	0.742947	0.468224	FALSE	FALSE
AAT	D25	Leiomyoma of uterus	FINRISK97	7512	182	199	0.98	0.0816	[0.83, 1.15]	0.799133	0.470274	FALSE	FALSE
AAT	D25	Leiomyoma of uterus	DILGOM07	4769	67	243	0.97	0.1356	[0.74, 1.26]	0.816374	0.603045	FALSE	FALSE
AAT	D37-D48	Neoplasms of uncertain or unknown behaviour	Meta-analysis	12281	345	127	1.17169	0.0552995	[1.05, 1.31]	0.00416599	0.013237	TRUE	FALSE
AAT	D37-D48	Neoplasms of uncertain or unknown behaviour	FINRISK97	7512	188	11	1.1	0.0756	[0.95, 1.27]	0.217972	0.315037	FALSE	FALSE
AAT	D37-D48	Neoplasms of uncertain or unknown behaviour	DILGOM07	4769	157	116	1.26	0.0811	[1.07, 1.48]	0.00456355	0.0209892	FALSE	FALSE
AAT	D37-D48	Neoplasms of uncertain or unknown behaviour	Training	615	23	<10	0.56	0.267381	[0.33, 0.95]	0.0301198	0.0989651	FALSE	FALSE
AAT	D37-D48	Neoplasms of uncertain or unknown behaviour	Immunoassayed	630	24	<10	0.72	0.195739	[0.49, 1.06]	0.0932925	0.327071	FALSE	FALSE
AAT	D37	Neoplasm of uncertain or unknown behaviour of oral cavity and digestive organs	Meta-analysis	12281	62	19	1.29687	0.126548	[1.01, 1.66]	0.0399573	0.077869	FALSE	FALSE
AAT	D37	Neoplasm of uncertain or unknown behaviour of oral cavity and digestive organs	FINRISK97	7512	24	1	1.12	0.2047	[0.75, 1.67]	0.592777	0.44437	FALSE	FALSE
AAT	D37	Neoplasm of uncertain or unknown behaviour of oral cavity and digestive organs	DILGOM07	4769	38	18	1.42	0.161	[1.04, 1.95]	0.0281207	0.082908	FALSE	FALSE
AAT	D48	Neoplasm of uncertain or unknown behaviour of other and unspecified sites	Meta-analysis	12281	118	56	0.919627	0.102336	[0.75, 1.12]	0.412927	0.355598	FALSE	FALSE
AAT	D48	Neoplasm of uncertain or unknown behaviour of other and unspecified sites	FINRISK97	7512	66	5	0.86	0.1373	[0.65, 1.12]	0.25706	0.32251	FALSE	FALSE
AAT	D48	Neoplasm of uncertain or unknown behaviour of other and unspecified sites	DILGOM07	4769	52	51	1	0.1535	[0.74, 1.35]	0.987172	0.652266	FALSE	FALSE
AAT	D50-D53	Nutritional anaemias	Meta-analysis	12281	86	42	1.6866	0.0983961	[1.39, 2.05]	1.0823e-07	1.74412e-06	TRUE	FALSE
AAT	D50-D53	Nutritional anaemias	FINRISK97	7512	37	20	1.5	0.1647	[1.09, 2.08]	0.013429	0.0693181	FALSE	FALSE
AAT	D50-D53	Nutritional anaemias	DILGOM07	4769	49	22	1.8	0.1227	[1.42, 2.29]	1.64494e-06	0.000123596	TRUE	FALSE
AAT	D50	Iron deficiency anaemia	Meta-analysis	12281	78	35	1.68014	0.102984	[1.37, 2.06]	4.69286e-07	6.65264e-06	TRUE	FALSE
AAT	D50	Iron deficiency anaemia	FINRISK97	7512	32	17	1.34	0.1817	[0.94, 1.92]	0.104346	0.212808	FALSE	FALSE
AAT	D50	Iron deficiency anaemia	DILGOM07	4769	46	18	1.87	0.125	[1.47, 2.39]	5.12884e-07	5.89731e-05	TRUE	FALSE
AAT	D60-D64	Aplastic and other anaemias	Meta-analysis	12281	103	20	1.43192	0.0933448	[1.19, 1.72]	0.000120002	0.000704339	TRUE	FALSE
AAT	D60-D64	Aplastic and other anaemias	FINRISK97	7512	50	7	1.32	0.1435	[0.99, 1.74]	0.0561872	0.169183	FALSE	FALSE
AAT	D60-D64	Aplastic and other anaemias	DILGOM07	4769	53	13	1.52	0.1229	[1.19, 1.93]	0.000684945	0.00583386	TRUE	FALSE
AAT	D64	Other anaemias	Meta-analysis	12281	84	15	1.48412	0.101506	[1.22, 1.81]	0.000100399	0.000660799	TRUE	FALSE
AAT	D64	Other anaemias	FINRISK97	7512	38	3	1.26	0.1649	[0.91, 1.74]	0.161895	0.261147	FALSE	FALSE
AAT	D64	Other anaemias	DILGOM07	4769	46	12	1.64	0.1288	[1.27, 2.11]	0.000129238	0.00212288	TRUE	FALSE
AAT	E00-E07	Disorders of thyroid gland	Meta-analysis	12281	217	154	1.05333	0.0736219	[0.91, 1.22]	0.480394	0.379963	FALSE	FALSE
AAT	E00-E07	Disorders of thyroid gland	FINRISK97	7512	106	50	0.93	0.1066	[0.76, 1.15]	0.509391	0.423732	FALSE	FALSE
AAT	E00-E07	Disorders of thyroid gland	DILGOM07	4769	111	104	1.18	0.1018	[0.96, 1.44]	0.110611	0.213755	FALSE	FALSE
AAT	E03	Other hypothyroidism	Meta-analysis	12281	91	31	1.21067	0.109204	[0.98, 1.50]	0.0800199	0.119892	FALSE	FALSE
AAT	E03	Other hypothyroidism	FINRISK97	7512	36	11	1.32	0.1705	[0.94, 1.84]	0.106114	0.213011	FALSE	FALSE
AAT	E03	Other hypothyroidism	DILGOM07	4769	55	20	1.14	0.1422	[0.86, 1.51]	0.359232	0.419499	FALSE	FALSE
AAT	E04	Other non toxic goitre	Meta-analysis	12281	81	79	0.889262	0.122181	[0.70, 1.13]	0.336771	0.315041	FALSE	FALSE
AAT	E04	Other non toxic goitre	FINRISK97	7512	45	28	0.73	0.165	[0.53, 1.01]	0.0578461	0.171181	FALSE	FALSE
AAT	E04	Other non toxic goitre	DILGOM07	4769	36	51	1.13	0.1818	[0.79, 1.62]	0.487172	0.484992	FALSE	FALSE
AAT	E10-E14	Diabetes mellitus	Meta-analysis	12281	434	151	1.23675	0.0509069	[1.12, 1.37]	2.99244e-05	0.00025067	TRUE	FALSE
AAT	E10-E14	Diabetes mellitus	FINRISK97	7512	239	84	1.22	0.067	[1.07, 1.39]	0.00322684	0.0225411	FALSE	FALSE
AAT	E10-E14	Diabetes mellitus	DILGOM07	4769	195	67	1.26	0.0783	[1.08, 1.47]	0.00343606	0.0183762	FALSE	FALSE
AAT	E10	Insulin dependent diabetes mellitus	Meta-analysis	12281	61	24	1.22878	0.132314	[0.95, 1.59]	0.119461	0.157764	FALSE	FALSE
AAT	E10	Insulin dependent diabetes mellitus	FINRISK97	7512	40	6	1.17	0.1531	[0.87, 1.58]	0.303761	0.340562	FALSE	FALSE
AAT	E10	Insulin dependent diabetes mellitus	DILGOM07	4769	21	18	1.42	0.263	[0.85, 2.38]	0.183347	0.282977	FALSE	FALSE
AAT	E11	Type 2 diabetes mellitus	Meta-analysis	12281	397	142	1.28824	0.0526799	[1.16, 1.43]	1.52545e-06	1.87416e-05	TRUE	FALSE
AAT	E11	Type 2 diabetes mellitus	FINRISK97	7512	215	81	1.31	0.0698	[1.14, 1.50]	0.000133454	0.00141825	TRUE	FALSE
AAT	E11	Type 2 diabetes mellitus	DILGOM07	4769	182	61	1.26	0.0803	[1.08, 1.47]	0.00420843	0.0201624	FALSE	FALSE
AAT	E20-E35	Disorders of other endocrine glands	Meta-analysis	12281	52	42	1.29484	0.145224	[0.97, 1.72]	0.0752053	0.115346	FALSE	FALSE
AAT	E20-E35	Disorders of other endocrine glands	FINRISK97	7512	21	10	1.13	0.2285	[0.73, 1.78]	0.579547	0.443039	FALSE	FALSE
AAT	E20-E35	Disorders of other endocrine glands	DILGOM07	4769	31	32	1.42	0.1881	[0.98, 2.05]	0.0631442	0.148174	FALSE	FALSE
AAT	E65-E68	Obesity and other hyperalimentation	Meta-analysis	12281	145	77	1.20889	0.0818491	[1.03, 1.42]	0.0204671	0.0483573	FALSE	FALSE
AAT	E65-E68	Obesity and other hyperalimentation	FINRISK97	7512	64	28	1.23	0.1186	[0.98, 1.56]	0.0768659	0.188572	FALSE	FALSE
AAT	E65-E68	Obesity and other hyperalimentation	DILGOM07	4769	81	49	1.19	0.1131	[0.95, 1.48]	0.127589	0.233043	FALSE	FALSE
AAT	E66	Obesity	Meta-analysis	12281	144	77	1.20908	0.0822631	[1.03, 1.42]	0.021002	0.048622	FALSE	FALSE
AAT	E66	Obesity	FINRISK97	7512	64	28	1.23	0.1186	[0.98, 1.56]	0.0768659	0.188572	FALSE	FALSE
AAT	E66	Obesity	DILGOM07	4769	80	49	1.19	0.1142	[0.95, 1.49]	0.132714	0.234767	FALSE	FALSE
AAT	E70-E90	Metabolic disorders	Meta-analysis	12281	367	137	1.10559	0.0549548	[0.99, 1.23]	0.0677527	0.107639	FALSE	FALSE
AAT	E70-E90	Metabolic disorders	FINRISK97	7512	156	43	1.1	0.0829	[0.94, 1.30]	0.245948	0.319691	FALSE	FALSE
AAT	E70-E90	Metabolic disorders	DILGOM07	4769	211	94	1.11	0.0734	[0.96, 1.29]	0.144031	0.250927	FALSE	FALSE
AAT	E78	Disorders of lipoprotein metabolism and other lipidaemias	Meta-analysis	12281	272	93	1.04382	0.0660681	[0.92, 1.19]	0.516262	0.394778	FALSE	FALSE
AAT	E78	Disorders of lipoprotein metabolism and other lipidaemias	FINRISK97	7512	95	22	1.12	0.1074	[0.91, 1.38]	0.296114	0.340562	FALSE	FALSE
AAT	E78	Disorders of lipoprotein metabolism and other lipidaemias	DILGOM07	4769	177	71	1	0.0838	[0.85, 1.18]	0.987059	0.652266	FALSE	FALSE
AAT	F00-F09	Organic including symptomatic mental disorders	Meta-analysis	12281	145	21	1.11049	0.084086	[0.94, 1.31]	0.212616	0.238959	FALSE	FALSE
AAT	F00-F09	Organic including symptomatic mental disorders	FINRISK97	7512	89	6	1.05	0.1081	[0.85, 1.30]	0.647737	0.448362	FALSE	FALSE
AAT	F00-F09	Organic including symptomatic mental disorders	DILGOM07	4769	56	15	1.21	0.1338	[0.93, 1.57]	0.157495	0.261463	FALSE	FALSE
AAT	F00	Dementia in Alzheimer's disease	Meta-analysis	12281	62	3	0.910171	0.136261	[0.70, 1.19]	0.489721	0.382333	FALSE	FALSE
AAT	F00	Dementia in Alzheimer's disease	FINRISK97	7512	35	1	0.89	0.1774	[0.63, 1.25]	0.491891	0.423658	FALSE	FALSE
AAT	F00	Dementia in Alzheimer's disease	DILGOM07	4769	27	2	0.94	0.2128	[0.62, 1.43]	0.784967	0.593802	FALSE	FALSE
AAT	F10-F19	Mental and behavioural disorders due to psychoactive substance use	Meta-analysis	12281	214	168	1.35076	0.0668389	[1.18, 1.54]	6.84839e-06	6.64254e-05	TRUE	FALSE
AAT	F10-F19	Mental and behavioural disorders due to psychoactive substance use	FINRISK97	7512	147	87	1.22	0.0821	[1.04, 1.43]	0.0154455	0.0754172	FALSE	FALSE
AAT	F10-F19	Mental and behavioural disorders due to psychoactive substance use	DILGOM07	4769	67	81	1.65	0.1151	[1.32, 2.07]	1.23542e-05	0.000405865	TRUE	FALSE
AAT	F10	Mental and behavioural disorders due to use of alcohol	Meta-analysis	12281	182	158	1.32145	0.0727019	[1.15, 1.52]	0.000126124	0.000704339	TRUE	FALSE
AAT	F10	Mental and behavioural disorders due to use of alcohol	FINRISK97	7512	128	86	1.19	0.0886	[1.00, 1.41]	0.0524695	0.166553	FALSE	FALSE
AAT	F10	Mental and behavioural disorders due to use of alcohol	DILGOM07	4769	54	72	1.64	0.1272	[1.27, 2.10]	0.000109154	0.00193091	TRUE	FALSE
AAT	F20-F29	Schizophrenia schizotypal and delusional disorders	Meta-analysis	12281	92	99	1.05731	0.111556	[0.85, 1.32]	0.617404	0.435944	FALSE	FALSE
AAT	F20-F29	Schizophrenia schizotypal and delusional disorders	FINRISK97	7512	62	52	0.95	0.1366	[0.72, 1.24]	0.690551	0.463921	FALSE	FALSE
AAT	F20-F29	Schizophrenia schizotypal and delusional disorders	DILGOM07	4769	30	47	1.31	0.1933	[0.90, 1.91]	0.164317	0.266109	FALSE	FALSE
AAT	F30-F39	Mood [affective] disorders	Meta-analysis	12281	364	267	1.12123	0.0542038	[1.01, 1.25]	0.034762	0.0696331	FALSE	FALSE
AAT	F30-F39	Mood [affective] disorders	FINRISK97	7512	211	109	1.02	0.0719	[0.88, 1.17]	0.806237	0.472914	FALSE	FALSE
AAT	F30-F39	Mood [affective] disorders	DILGOM07	4769	153	158	1.27	0.0825	[1.08, 1.49]	0.00380627	0.0188848	FALSE	FALSE
AAT	F31	Bipolar affective disorder	Meta-analysis	12281	49	55	1.46022	0.131972	[1.13, 1.89]	0.0041213	0.013237	TRUE	FALSE
AAT	F31	Bipolar affective disorder	FINRISK97	7512	22	37	1.23	0.1968	[0.84, 1.81]	0.292173	0.338366	FALSE	FALSE
AAT	F31	Bipolar affective disorder	DILGOM07	4769	27	18	1.68	0.1779	[1.18, 2.37]	0.00373386	0.0188848	FALSE	FALSE
AAT	F32	Depressive episode	Meta-analysis	12281	281	144	1.10534	0.0620019	[0.98, 1.25]	0.106228	0.144808	FALSE	FALSE
AAT	F32	Depressive episode	FINRISK97	7512	169	23	1.03	0.0799	[0.88, 1.21]	0.704343	0.465501	FALSE	FALSE
AAT	F32	Depressive episode	DILGOM07	4769	112	121	1.23	0.0983	[1.02, 1.50]	0.0331443	0.0907389	FALSE	FALSE
AAT	F33	Recurrent depressive disorder	Meta-analysis	12281	108	40	1.07634	0.100641	[0.88, 1.31]	0.464776	0.374031	FALSE	FALSE
AAT	F33	Recurrent depressive disorder	FINRISK97	7512	48	2	0.86	0.1567	[0.63, 1.16]	0.319957	0.346135	FALSE	FALSE
AAT	F33	Recurrent depressive disorder	DILGOM07	4769	60	38	1.26	0.1313	[0.98, 1.64]	0.0740553	0.166963	FALSE	FALSE
AAT	F40-F48	Neurotic, stress-related and somatoform disorders	Meta-analysis	12281	226	134	1.02013	0.0704559	[0.89, 1.17]	0.777279	0.474219	FALSE	FALSE
AAT	F40-F48	Neurotic, stress-related and somatoform disorders	FINRISK97	7512	127	40	0.91	0.0954	[0.76, 1.10]	0.339792	0.356907	FALSE	FALSE
AAT	F40-F48	Neurotic, stress-related and somatoform disorders	DILGOM07	4769	99	94	1.17	0.1045	[0.95, 1.44]	0.134452	0.236027	FALSE	FALSE
AAT	F41	Other anxiety disorders	Meta-analysis	12281	102	52	1.14607	0.10153	[0.94, 1.40]	0.179326	0.21742	FALSE	FALSE
AAT	F41	Other anxiety disorders	FINRISK97	7512	60	11	1.04	0.1351	[0.80, 1.35]	0.780242	0.469708	FALSE	FALSE
AAT	F41	Other anxiety disorders	DILGOM07	4769	42	41	1.3	0.1539	[0.96, 1.76]	0.0849311	0.178004	FALSE	FALSE
AAT	F43	Reaction to severe stress and adjustment disorders	Meta-analysis	12281	90	55	1.02877	0.11066	[0.83, 1.28]	0.79774	0.474241	FALSE	FALSE
AAT	F43	Reaction to severe stress and adjustment disorders	FINRISK97	7512	46	14	0.74	0.1634	[0.54, 1.03]	0.0707752	0.188037	FALSE	FALSE
AAT	F43	Reaction to severe stress and adjustment disorders	DILGOM07	4769	44	41	1.36	0.1504	[1.01, 1.82]	0.042012	0.109788	FALSE	FALSE
AAT	G20-G26	Extrapyramidal and movement disorders	Meta-analysis	12281	119	26	1.21161	0.0955588	[1.00, 1.46]	0.044567	0.0809948	FALSE	FALSE
AAT	G20-G26	Extrapyramidal and movement disorders	FINRISK97	7512	61	6	1.22	0.1252	[0.95, 1.56]	0.112358	0.218924	FALSE	FALSE
AAT	G20-G26	Extrapyramidal and movement disorders	DILGOM07	4769	58	20	1.2	0.1479	[0.90, 1.61]	0.211681	0.314062	FALSE	FALSE
AAT	G20	Parkinson's disease	Meta-analysis	12281	56	10	1.05281	0.145654	[0.79, 1.40]	0.72385	0.466809	FALSE	FALSE
AAT	G20	Parkinson's disease	FINRISK97	7512	29	1	1.13	0.1936	[0.77, 1.65]	0.54037	0.43197	FALSE	FALSE
AAT	G20	Parkinson's disease	DILGOM07	4769	27	9	0.96	0.2211	[0.62, 1.48]	0.862502	0.614075	FALSE	FALSE
AAT	G30-G32	Other degenerative diseases of the central nervous system	Meta-analysis	12281	92	4	0.978297	0.111526	[0.79, 1.22]	0.844025	0.47971	FALSE	FALSE
AAT	G30-G32	Other degenerative diseases of the central nervous system	FINRISK97	7512	44	1	0.94	0.156	[0.69, 1.28]	0.705911	0.465501	FALSE	FALSE
AAT	G30-G32	Other degenerative diseases of the central nervous system	DILGOM07	4769	48	3	1.02	0.1595	[0.75, 1.40]	0.882366	0.620533	FALSE	FALSE
AAT	G30	Alzheimer's disease	Meta-analysis	12281	81	2	0.893748	0.122035	[0.70, 1.14]	0.357317	0.325988	FALSE	FALSE
AAT	G30	Alzheimer's disease	FINRISK97	7512	38	1	0.86	0.1712	[0.61, 1.20]	0.376601	0.360683	FALSE	FALSE
AAT	G30	Alzheimer's disease	DILGOM07	4769	43	1	0.93	0.174	[0.66, 1.30]	0.658374	0.562839	FALSE	FALSE
AAT	G40-G47	Episodic and paroxysmal disorders	Meta-analysis	12281	859	478	1.04763	0.0361152	[0.98, 1.12]	0.19759	0.230466	FALSE	FALSE
AAT	G40-G47	Episodic and paroxysmal disorders	FINRISK97	7512	464	150	0.97	0.0488	[0.88, 1.07]	0.50413	0.423732	FALSE	FALSE
AAT	G40-G47	Episodic and paroxysmal disorders	DILGOM07	4769	395	328	1.15	0.0537	[1.04, 1.28]	0.00852962	0.0346035	FALSE	FALSE
AAT	G40-G47	Episodic and paroxysmal disorders	Training	615	38	<10	0.97	0.182302	[0.67, 1.40]	0.867306	0.949907	FALSE	FALSE
AAT	G40-G47	Episodic and paroxysmal disorders	Immunoassayed	630	39	<10	1	0.189318	[0.69, 1.46]	0.986475	0.819929	FALSE	FALSE
AAT	G40	Epilepsy	Meta-analysis	12281	120	52	1.16717	0.0953258	[0.97, 1.41]	0.104894	0.144808	FALSE	FALSE
AAT	G40	Epilepsy	FINRISK97	7512	76	15	0.98	0.1256	[0.77, 1.26]	0.88385	0.481991	FALSE	FALSE
AAT	G40	Epilepsy	DILGOM07	4769	44	37	1.48	0.1464	[1.11, 1.97]	0.00754097	0.0315304	FALSE	FALSE
AAT	G43	Migraine	Meta-analysis	12281	112	73	1.06455	0.100566	[0.87, 1.30]	0.53393	0.39837	FALSE	FALSE
AAT	G43	Migraine	FINRISK97	7512	50	19	0.92	0.1471	[0.69, 1.22]	0.551416	0.435225	FALSE	FALSE
AAT	G43	Migraine	DILGOM07	4769	62	54	1.21	0.1378	[0.92, 1.58]	0.174768	0.277178	FALSE	FALSE
AAT	G44	Other headache syndromes	Meta-analysis	12281	172	121	1.00936	0.0811182	[0.86, 1.18]	0.908517	0.498626	FALSE	FALSE
AAT	G44	Other headache syndromes	FINRISK97	7512	112	42	1.02	0.1007	[0.84, 1.24]	0.835575	0.476704	FALSE	FALSE
AAT	G44	Other headache syndromes	DILGOM07	4769	60	79	0.99	0.1369	[0.76, 1.30]	0.968982	0.648384	FALSE	FALSE
AAT	G45	Transient cerebral ischaemic attacks and related syndromes	Meta-analysis	12281	242	90	0.958156	0.0696609	[0.84, 1.10]	0.539472	0.398965	FALSE	FALSE
AAT	G45	Transient cerebral ischaemic attacks and related syndromes	FINRISK97	7512	140	26	0.9	0.0904	[0.76, 1.08]	0.260634	0.324738	FALSE	FALSE
AAT	G45	Transient cerebral ischaemic attacks and related syndromes	DILGOM07	4769	102	64	1.05	0.1093	[0.84, 1.29]	0.685896	0.573575	FALSE	FALSE
AAT	G47	Sleep disorders	Meta-analysis	12281	264	166	1.0523	0.0663574	[0.92, 1.20]	0.442376	0.366915	FALSE	FALSE
AAT	G47	Sleep disorders	FINRISK97	7512	114	47	0.94	0.1	[0.77, 1.14]	0.520683	0.423732	FALSE	FALSE
AAT	G47	Sleep disorders	DILGOM07	4769	150	119	1.15	0.0887	[0.97, 1.37]	0.118299	0.221176	FALSE	FALSE
AAT	G50-G59	Nerve nerve root and plexus disorders	Meta-analysis	12281	459	339	0.996084	0.0517502	[0.90, 1.10]	0.939556	0.506286	FALSE	FALSE
AAT	G50-G59	Nerve nerve root and plexus disorders	FINRISK97	7512	267	103	0.94	0.0678	[0.82, 1.08]	0.371631	0.360683	FALSE	FALSE
AAT	G50-G59	Nerve nerve root and plexus disorders	DILGOM07	4769	192	236	1.08	0.0801	[0.92, 1.26]	0.357378	0.419499	FALSE	FALSE
AAT	G56	Mononeuropathies of upper limb	Meta-analysis	12281	285	198	0.984549	0.0662368	[0.86, 1.12]	0.814139	0.476308	FALSE	FALSE
AAT	G56	Mononeuropathies of upper limb	FINRISK97	7512	150	67	0.85	0.0924	[0.71, 1.02]	0.0813302	0.193334	FALSE	FALSE
AAT	G56	Mononeuropathies of upper limb	DILGOM07	4769	135	131	1.15	0.095	[0.95, 1.38]	0.153093	0.258869	FALSE	FALSE
AAT	G57	Mononeuropathies of lower limb	Meta-analysis	12281	55	67	1.07919	0.140102	[0.82, 1.42]	0.586471	0.420545	FALSE	FALSE
AAT	G57	Mononeuropathies of lower limb	FINRISK97	7512	34	21	0.97	0.1786	[0.69, 1.38]	0.885392	0.481991	FALSE	FALSE
AAT	G57	Mononeuropathies of lower limb	DILGOM07	4769	21	46	1.28	0.2259	[0.82, 1.99]	0.281146	0.369452	FALSE	FALSE
AAT	G90-G99	Other disorders of the nervous system	Meta-analysis	12281	60	44	1.20573	0.135562	[0.92, 1.57]	0.167557	0.208642	FALSE	FALSE
AAT	G90-G99	Other disorders of the nervous system	FINRISK97	7512	33	14	1.41	0.173	[1.01, 1.98]	0.0452483	0.163495	FALSE	FALSE
AAT	G90-G99	Other disorders of the nervous system	DILGOM07	4769	27	30	0.94	0.2182	[0.61, 1.44]	0.764175	0.591699	FALSE	FALSE
AAT	H00-H06	Disorders of eyelid lachrymal system and orbit	Meta-analysis	12281	302	111	1.07791	0.0606686	[0.96, 1.21]	0.216213	0.23932	FALSE	FALSE
AAT	H00-H06	Disorders of eyelid lachrymal system and orbit	FINRISK97	7512	139	19	1.14	0.0861	[0.97, 1.35]	0.117846	0.218924	FALSE	FALSE
AAT	H00-H06	Disorders of eyelid lachrymal system and orbit	DILGOM07	4769	163	92	1.02	0.0855	[0.86, 1.20]	0.847335	0.611502	FALSE	FALSE
AAT	H02	Other disorders of eyelid	Meta-analysis	12281	136	40	1.0042	0.0939031	[0.84, 1.21]	0.964439	0.516673	FALSE	FALSE
AAT	H02	Other disorders of eyelid	FINRISK97	7512	63	7	1.05	0.1325	[0.81, 1.36]	0.737489	0.469708	FALSE	FALSE
AAT	H02	Other disorders of eyelid	DILGOM07	4769	73	33	0.96	0.1331	[0.74, 1.24]	0.7418	0.584209	FALSE	FALSE
AAT	H04	Disorders of lachrymal system	Meta-analysis	12281	104	38	1.09608	0.105446	[0.89, 1.35]	0.384292	0.341146	FALSE	FALSE
AAT	H04	Disorders of lachrymal system	FINRISK97	7512	42	9	1.16	0.1606	[0.85, 1.59]	0.351737	0.360683	FALSE	FALSE
AAT	H04	Disorders of lachrymal system	DILGOM07	4769	62	29	1.05	0.1398	[0.80, 1.39]	0.703127	0.577018	FALSE	FALSE
AAT	H10-H13	Disorders of conjunctiva	Meta-analysis	12281	97	57	1.14893	0.104497	[0.94, 1.41]	0.183978	0.221602	FALSE	FALSE
AAT	H10-H13	Disorders of conjunctiva	FINRISK97	7512	59	10	1.19	0.1277	[0.93, 1.53]	0.166679	0.263423	FALSE	FALSE
AAT	H10-H13	Disorders of conjunctiva	DILGOM07	4769	38	47	1.07	0.1818	[0.75, 1.53]	0.711682	0.577018	FALSE	FALSE
AAT	H10	Conjunctivitis	Meta-analysis	12281	66	29	1.22655	0.120742	[0.97, 1.55]	0.0907906	0.130716	FALSE	FALSE
AAT	H10	Conjunctivitis	FINRISK97	7512	38	4	1.23	0.1491	[0.91, 1.64]	0.17291	0.266996	FALSE	FALSE
AAT	H10	Conjunctivitis	DILGOM07	4769	28	25	1.22	0.2058	[0.81, 1.82]	0.339524	0.412461	FALSE	FALSE
AAT	H15-H22	Disorders of sclera cornea iris and ciliary body	Meta-analysis	12281	187	101	1.22574	0.0737483	[1.06, 1.42]	0.0057803	0.0177541	FALSE	FALSE
AAT	H15-H22	Disorders of sclera cornea iris and ciliary body	FINRISK97	7512	103	19	1.18	0.0974	[0.97, 1.43]	0.0917009	0.207088	FALSE	FALSE
AAT	H15-H22	Disorders of sclera cornea iris and ciliary body	DILGOM07	4769	84	82	1.29	0.1129	[1.03, 1.61]	0.0242507	0.0743578	FALSE	FALSE
AAT	H16	Keratitis	Meta-analysis	12281	75	36	1.16	0.115868	[0.92, 1.46]	0.200216	0.23206	FALSE	FALSE
AAT	H16	Keratitis	FINRISK97	7512	38	4	1.16	0.154	[0.86, 1.57]	0.328456	0.352987	FALSE	FALSE
AAT	H16	Keratitis	DILGOM07	4769	37	32	1.16	0.1759	[0.82, 1.63]	0.41085	0.451972	FALSE	FALSE
AAT	H20	Iridocyclitis	Meta-analysis	12281	70	33	1.54933	0.112879	[1.24, 1.93]	0.000105003	0.000667273	TRUE	FALSE
AAT	H20	Iridocyclitis	FINRISK97	7512	39	8	1.46	0.1511	[1.08, 1.96]	0.0125308	0.0670034	FALSE	FALSE
AAT	H20	Iridocyclitis	DILGOM07	4769	31	25	1.67	0.1698	[1.20, 2.33]	0.00246952	0.0149449	TRUE	FALSE
AAT	H25-H28	Disorders of lens	Meta-analysis	12281	667	202	1.10259	0.0411452	[1.02, 1.20]	0.0176202	0.0438715	FALSE	FALSE
AAT	H25-H28	Disorders of lens	FINRISK97	7512	347	77	1.07	0.0567	[0.96, 1.20]	0.233039	0.316115	FALSE	FALSE
AAT	H25-H28	Disorders of lens	DILGOM07	4769	320	125	1.14	0.0598	[1.02, 1.28]	0.0260229	0.0777193	FALSE	FALSE
AAT	H25-H28	Disorders of lens	Training	615	43	<10	1.09	0.159905	[0.79, 1.51]	0.589935	0.726281	FALSE	FALSE
AAT	H25-H28	Disorders of lens	Immunoassayed	630	43	<10	0.96	0.154276	[0.69, 1.33]	0.791314	0.774461	FALSE	FALSE
AAT	H25	Senile cataract	Meta-analysis	12281	604	146	1.11106	0.0434862	[1.02, 1.21]	0.015447	0.0400946	FALSE	FALSE
AAT	H25	Senile cataract	FINRISK97	7512	314	52	1.06	0.0601	[0.94, 1.19]	0.368272	0.360683	FALSE	FALSE
AAT	H25	Senile cataract	DILGOM07	4769	290	94	1.17	0.063	[1.03, 1.32]	0.0136709	0.046923	FALSE	FALSE
AAT	H25	Senile cataract	Training	615	42	<10	1.11	0.158921	[0.81, 1.53]	0.511387	0.691876	FALSE	FALSE
AAT	H25	Senile cataract	Immunoassayed	630	42	<10	0.94	0.175031	[0.68, 1.31]	0.723705	0.746578	FALSE	FALSE
AAT	H26	Other cataract	Meta-analysis	12281	149	76	1.08257	0.0858575	[0.91, 1.28]	0.35544	0.325889	FALSE	FALSE
AAT	H26	Other cataract	FINRISK97	7512	81	23	1.26	0.1106	[1.01, 1.56]	0.0375401	0.150714	FALSE	FALSE
AAT	H26	Other cataract	DILGOM07	4769	68	53	0.86	0.1362	[0.66, 1.12]	0.272484	0.362209	FALSE	FALSE
AAT	H30-H36	Disorders of choroid and retina	Meta-analysis	12281	302	94	0.97308	0.0631477	[0.86, 1.10]	0.665642	0.444458	FALSE	FALSE
AAT	H30-H36	Disorders of choroid and retina	FINRISK97	7512	135	23	1.01	0.091	[0.84, 1.20]	0.935995	0.497021	FALSE	FALSE
AAT	H30-H36	Disorders of choroid and retina	DILGOM07	4769	167	71	0.94	0.0877	[0.79, 1.11]	0.469282	0.481782	FALSE	FALSE
AAT	H33	Retinal detachments and breaks	Meta-analysis	12281	72	37	0.73	0.138358	[0.56, 0.96]	0.0229294	0.0503052	FALSE	FALSE
AAT	H33	Retinal detachments and breaks	FINRISK97	7512	30	9	0.73	0.2054	[0.49, 1.10]	0.129259	0.225678	FALSE	FALSE
AAT	H33	Retinal detachments and breaks	DILGOM07	4769	42	28	0.73	0.1872	[0.51, 1.05]	0.0934233	0.186819	FALSE	FALSE
AAT	H35	Other retinal disorders	Meta-analysis	12281	153	39	1.10967	0.086542	[0.94, 1.31]	0.229201	0.248466	FALSE	FALSE
AAT	H35	Other retinal disorders	FINRISK97	7512	59	7	1.23	0.129	[0.95, 1.58]	0.113446	0.218924	FALSE	FALSE
AAT	H35	Other retinal disorders	DILGOM07	4769	94	32	1.02	0.1167	[0.81, 1.28]	0.871079	0.618268	FALSE	FALSE
AAT	H36	Retinal disorders in diseases classified elsewhere	Meta-analysis	12281	55	11	1.156	0.139105	[0.88, 1.52]	0.297366	0.29463	FALSE	FALSE
AAT	H36	Retinal disorders in diseases classified elsewhere	FINRISK97	7512	32	3	1.16	0.1795	[0.82, 1.65]	0.409918	0.375925	FALSE	FALSE
AAT	H36	Retinal disorders in diseases classified elsewhere	DILGOM07	4769	23	8	1.15	0.2201	[0.75, 1.77]	0.520809	0.501454	FALSE	FALSE
AAT	H40-H42	Glaucoma	Meta-analysis	12281	262	127	0.929487	0.0664625	[0.82, 1.06]	0.271243	0.276172	FALSE	FALSE
AAT	H40-H42	Glaucoma	FINRISK97	7512	127	45	0.91	0.0933	[0.75, 1.09]	0.290005	0.338366	FALSE	FALSE
AAT	H40-H42	Glaucoma	DILGOM07	4769	135	82	0.95	0.0947	[0.79, 1.14]	0.562723	0.521133	FALSE	FALSE
AAT	H40	Glaucoma	Meta-analysis	12281	262	127	0.929487	0.0664625	[0.82, 1.06]	0.271243	0.276172	FALSE	FALSE
AAT	H40	Glaucoma	FINRISK97	7512	127	45	0.91	0.0933	[0.75, 1.09]	0.290005	0.338366	FALSE	FALSE
AAT	H40	Glaucoma	DILGOM07	4769	135	82	0.95	0.0947	[0.79, 1.14]	0.562723	0.521133	FALSE	FALSE
AAT	H43-H45	Disorders of vitreous body and globe	Meta-analysis	12281	123	32	0.772548	0.106218	[0.63, 0.95]	0.0151179	0.0398009	FALSE	FALSE
AAT	H43-H45	Disorders of vitreous body and globe	FINRISK97	7512	47	3	0.83	0.1599	[0.60, 1.13]	0.230898	0.316115	FALSE	FALSE
AAT	H43-H45	Disorders of vitreous body and globe	DILGOM07	4769	76	29	0.73	0.1421	[0.55, 0.96]	0.0247417	0.0748651	FALSE	FALSE
AAT	H43	Disorders of vitreous body	Meta-analysis	12281	118	29	0.788661	0.107867	[0.64, 0.97]	0.027734	0.0594309	FALSE	FALSE
AAT	H43	Disorders of vitreous body	FINRISK97	7512	43	3	0.86	0.1657	[0.62, 1.20]	0.380383	0.360683	FALSE	FALSE
AAT	H43	Disorders of vitreous body	DILGOM07	4769	75	26	0.74	0.1421	[0.56, 0.98]	0.0368547	0.0974178	FALSE	FALSE
AAT	H49-H52	Disorders of ocular muscles binocular movement accommodation and refraction	Meta-analysis	12281	93	65	1.05585	0.110285	[0.85, 1.31]	0.622139	0.435944	FALSE	FALSE
AAT	H49-H52	Disorders of ocular muscles binocular movement accommodation and refraction	FINRISK97	7512	52	15	1.12	0.1436	[0.85, 1.49]	0.418501	0.381858	FALSE	FALSE
AAT	H49-H52	Disorders of ocular muscles binocular movement accommodation and refraction	DILGOM07	4769	41	50	0.97	0.1722	[0.69, 1.36]	0.855114	0.612609	FALSE	FALSE
AAT	H53-H54	Visual disturbances and blindness	Meta-analysis	12281	112	36	1.03239	0.100773	[0.85, 1.26]	0.751788	0.468782	FALSE	FALSE
AAT	H53-H54	Visual disturbances and blindness	FINRISK97	7512	49	4	0.99	0.1485	[0.74, 1.33]	0.961222	0.501901	FALSE	FALSE
AAT	H53-H54	Visual disturbances and blindness	DILGOM07	4769	63	32	1.07	0.1372	[0.82, 1.40]	0.631141	0.551867	FALSE	FALSE
AAT	H53	Visual disturbances	Meta-analysis	12281	101	31	1.02516	0.105475	[0.83, 1.26]	0.813766	0.476308	FALSE	FALSE
AAT	H53	Visual disturbances	FINRISK97	7512	47	3	0.98	0.1511	[0.73, 1.32]	0.888408	0.481991	FALSE	FALSE
AAT	H53	Visual disturbances	DILGOM07	4769	54	28	1.07	0.1473	[0.80, 1.43]	0.650024	0.559422	FALSE	FALSE
AAT	H60-H62	Diseases of external ear	Meta-analysis	12281	70	28	1.0447	0.127986	[0.81, 1.34]	0.73259	0.467157	FALSE	FALSE
AAT	H60-H62	Diseases of external ear	FINRISK97	7512	34	7	1.07	0.181	[0.75, 1.52]	0.724777	0.469708	FALSE	FALSE
AAT	H60-H62	Diseases of external ear	DILGOM07	4769	36	21	1.02	0.181	[0.71, 1.45]	0.918011	0.632933	FALSE	FALSE
AAT	H60	Otitis externa	Meta-analysis	12281	46	14	1.03853	0.158674	[0.76, 1.42]	0.811696	0.476308	FALSE	FALSE
AAT	H60	Otitis externa	FINRISK97	7512	24	3	1.01	0.2206	[0.66, 1.56]	0.95827	0.501901	FALSE	FALSE
AAT	H60	Otitis externa	DILGOM07	4769	22	11	1.07	0.2284	[0.68, 1.67]	0.773879	0.593802	FALSE	FALSE
AAT	H65-H75	Diseases of middle ear and mastoid	Meta-analysis	12281	115	89	1.21331	0.0954665	[1.01, 1.46]	0.0428323	0.0797748	FALSE	FALSE
AAT	H65-H75	Diseases of middle ear and mastoid	FINRISK97	7512	71	28	1.21	0.1168	[0.97, 1.53]	0.0963622	0.207651	FALSE	FALSE
AAT	H65-H75	Diseases of middle ear and mastoid	DILGOM07	4769	44	61	1.22	0.1657	[0.88, 1.69]	0.227963	0.331796	FALSE	FALSE
AAT	H66	Suppurative and unspecified otitis media	Meta-analysis	12281	61	27	1.28512	0.124127	[1.01, 1.64]	0.0432879	0.0797748	FALSE	FALSE
AAT	H66	Suppurative and unspecified otitis media	FINRISK97	7512	39	12	1.26	0.1506	[0.94, 1.70]	0.121111	0.220984	FALSE	FALSE
AAT	H66	Suppurative and unspecified otitis media	DILGOM07	4769	22	15	1.34	0.2192	[0.87, 2.06]	0.180755	0.282772	FALSE	FALSE
AAT	H80-H83	Diseases of inner ear	Meta-analysis	12281	209	112	0.952834	0.0774879	[0.82, 1.11]	0.532947	0.39837	FALSE	FALSE
AAT	H80-H83	Diseases of inner ear	FINRISK97	7512	115	29	0.97	0.1021	[0.80, 1.19]	0.775458	0.469708	FALSE	FALSE
AAT	H80-H83	Diseases of inner ear	DILGOM07	4769	94	83	0.93	0.119	[0.73, 1.17]	0.528521	0.506425	FALSE	FALSE
AAT	H81	Disorders of vestibular function	Meta-analysis	12281	162	66	0.937229	0.0885862	[0.79, 1.11]	0.464286	0.374031	FALSE	FALSE
AAT	H81	Disorders of vestibular function	FINRISK97	7512	89	11	0.95	0.1165	[0.76, 1.20]	0.689739	0.463921	FALSE	FALSE
AAT	H81	Disorders of vestibular function	DILGOM07	4769	73	55	0.92	0.1364	[0.71, 1.21]	0.559151	0.521133	FALSE	FALSE
AAT	H90-H95	Other disorders of ear	Meta-analysis	12281	601	204	0.956203	0.0452124	[0.88, 1.04]	0.321906	0.307377	FALSE	FALSE
AAT	H90-H95	Other disorders of ear	FINRISK97	7512	305	13	0.91	0.0624	[0.80, 1.03]	0.118339	0.218924	FALSE	FALSE
AAT	H90-H95	Other disorders of ear	DILGOM07	4769	296	191	1.01	0.0656	[0.89, 1.15]	0.895125	0.627587	FALSE	FALSE
AAT	H90-H95	Other disorders of ear	Training	615	30	<10	0.72	0.247635	[0.45, 1.17]	0.184652	0.372905	FALSE	FALSE
AAT	H90-H95	Other disorders of ear	Immunoassayed	630	30	<10	0.79	0.198295	[0.53, 1.17]	0.23454	0.500328	FALSE	FALSE
AAT	H90	Conductive and sensorineural hearing loss	Meta-analysis	12281	488	155	0.983017	0.0499486	[0.89, 1.08]	0.731652	0.467157	FALSE	FALSE
AAT	H90	Conductive and sensorineural hearing loss	FINRISK97	7512	240	4	0.94	0.0699	[0.82, 1.08]	0.363824	0.360683	FALSE	FALSE
AAT	H90	Conductive and sensorineural hearing loss	DILGOM07	4769	248	151	1.03	0.0714	[0.89, 1.18]	0.714433	0.577018	FALSE	FALSE
AAT	H90	Conductive and sensorineural hearing loss	Training	615	23	<10	0.87	0.273952	[0.51, 1.49]	0.611211	0.726281	FALSE	FALSE
AAT	H90	Conductive and sensorineural hearing loss	Immunoassayed	630	23	<10	0.91	0.244099	[0.57, 1.46]	0.699228	0.746578	FALSE	FALSE
AAT	H91	Other hearing loss	Meta-analysis	12281	77	33	0.953088	0.125285	[0.75, 1.22]	0.70134	0.45833	FALSE	FALSE
AAT	H91	Other hearing loss	FINRISK97	7512	47	5	0.92	0.1545	[0.68, 1.25]	0.613164	0.446463	FALSE	FALSE
AAT	H91	Other hearing loss	DILGOM07	4769	30	28	1.02	0.2141	[0.67, 1.55]	0.919264	0.632933	FALSE	FALSE
AAT	H93	Other disorders of ear not elsewhere classified	Meta-analysis	12281	74	35	0.808761	0.130518	[0.63, 1.04]	0.103902	0.144808	FALSE	FALSE
AAT	H93	Other disorders of ear not elsewhere classified	FINRISK97	7512	37	4	0.75	0.1796	[0.53, 1.07]	0.11555	0.218924	FALSE	FALSE
AAT	H93	Other disorders of ear not elsewhere classified	DILGOM07	4769	37	31	0.88	0.19	[0.61, 1.28]	0.498018	0.486823	FALSE	FALSE
AAT	I10-I15	Hypertensive diseases	Meta-analysis	12281	984	382	1.13751	0.0334815	[1.07, 1.21]	0.000118965	0.000704339	TRUE	FALSE
AAT	I10-I15	Hypertensive diseases	FINRISK97	7512	410	157	1.12	0.0521	[1.01, 1.24]	0.0276865	0.116324	FALSE	FALSE
AAT	I10-I15	Hypertensive diseases	DILGOM07	4769	574	225	1.15	0.0437	[1.05, 1.25]	0.00173543	0.0120959	TRUE	FALSE
AAT	I10-I15	Hypertensive diseases	Training	615	59	<10	1.32	0.123172	[1.04, 1.68]	0.0241956	0.092216	FALSE	FALSE
AAT	I10-I15	Hypertensive diseases	Immunoassayed	630	59	<10	1.3	0.160893	[0.95, 1.78]	0.102959	0.32749	FALSE	FALSE
AAT	I10	Essential (primary) hypertension	Meta-analysis	12281	944	340	1.13911	0.0344193	[1.06, 1.22]	0.000154171	0.000835645	TRUE	FALSE
AAT	I10	Essential (primary) hypertension	FINRISK97	7512	391	132	1.11	0.0536	[1.00, 1.24]	0.0449108	0.163495	FALSE	FALSE
AAT	I10	Essential (primary) hypertension	DILGOM07	4769	553	208	1.16	0.0449	[1.06, 1.26]	0.00119686	0.00949094	TRUE	FALSE
AAT	I10	Essential (primary) hypertension	Training	615	56	<10	1.38	0.138053	[1.05, 1.81]	0.019646	0.0903714	FALSE	FALSE
AAT	I10	Essential (primary) hypertension	Immunoassayed	630	56	<10	1.41	0.168089	[1.01, 1.95]	0.0409443	0.247026	FALSE	FALSE
AAT	I11	Hypertensive heart disease	Meta-analysis	12281	87	40	1.38213	0.107975	[1.12, 1.71]	0.00272423	0.00947256	TRUE	FALSE
AAT	I11	Hypertensive heart disease	FINRISK97	7512	42	26	1.72	0.1416	[1.30, 2.27]	0.000129617	0.00141825	TRUE	FALSE
AAT	I11	Hypertensive heart disease	DILGOM07	4769	45	14	1.02	0.1669	[0.73, 1.41]	0.910237	0.632398	FALSE	FALSE
AAT	I20-I25	Ischaemic heart diseases	Meta-analysis	12281	925	502	1.20898	0.0338037	[1.13, 1.29]	1.97552e-08	4.98129e-07	TRUE	TRUE
AAT	I20-I25	Ischaemic heart diseases	FINRISK97	7512	568	268	1.22	0.0424	[1.13, 1.33]	1.90574e-06	0.000106361	TRUE	TRUE
AAT	I20-I25	Ischaemic heart diseases	DILGOM07	4769	357	234	1.19	0.056	[1.07, 1.33]	0.00202087	0.0129092	TRUE	TRUE
AAT	I20-I25	Ischaemic heart diseases	Training	615	31	<10	1.68	0.173364	[1.19, 2.35]	0.00276695	0.025456	FALSE	TRUE
AAT	I20-I25	Ischaemic heart diseases	Immunoassayed	630	32	<10	1.44	0.217912	[0.94, 2.21]	0.0942584	0.327071	FALSE	TRUE
AAT	I20	Angina pectoris	Meta-analysis	12281	513	327	1.1774	0.0454758	[1.08, 1.29]	0.000329294	0.00153578	TRUE	FALSE
AAT	I20	Angina pectoris	FINRISK97	7512	343	164	1.19	0.0548	[1.07, 1.32]	0.00151088	0.0129981	TRUE	FALSE
AAT	I20	Angina pectoris	DILGOM07	4769	170	163	1.15	0.0815	[0.98, 1.35]	0.0925934	0.186784	FALSE	FALSE
AAT	I21	Acute myocardial infarction	Meta-analysis	12281	247	167	1.28777	0.0632653	[1.14, 1.46]	6.39901e-05	0.000471707	TRUE	FALSE
AAT	I21	Acute myocardial infarction	FINRISK97	7512	156	98	1.31	0.0794	[1.12, 1.53]	0.000651353	0.00588379	TRUE	FALSE
AAT	I21	Acute myocardial infarction	DILGOM07	4769	91	69	1.25	0.1047	[1.02, 1.53]	0.0350219	0.0947511	FALSE	FALSE
AAT	I25	Chronic ischaemic heart disease	Meta-analysis	12281	677	267	1.23453	0.0397258	[1.14, 1.33]	1.13569e-07	1.74412e-06	TRUE	FALSE
AAT	I25	Chronic ischaemic heart disease	FINRISK97	7512	386	129	1.26	0.0521	[1.14, 1.40]	7.50357e-06	0.00019366	TRUE	FALSE
AAT	I25	Chronic ischaemic heart disease	DILGOM07	4769	291	138	1.2	0.0614	[1.06, 1.35]	0.00327403	0.0179266	FALSE	FALSE
AAT	I25	Chronic ischaemic heart disease	Training	615	27	<10	1.64	0.185054	[1.14, 2.35]	0.00751207	0.0501211	FALSE	FALSE
AAT	I25	Chronic ischaemic heart disease	Immunoassayed	630	28	<10	1.4	0.23023	[0.89, 2.21]	0.143889	0.392296	FALSE	FALSE
AAT	I26-I28	Pulmonary heart disease and diseases of pulmonary circulation	Meta-analysis	12281	76	31	1.27787	0.109981	[1.03, 1.59]	0.0257851	0.0559047	FALSE	FALSE
AAT	I26-I28	Pulmonary heart disease and diseases of pulmonary circulation	FINRISK97	7512	47	14	1.17	0.1469	[0.88, 1.56]	0.284287	0.338366	FALSE	FALSE
AAT	I26-I28	Pulmonary heart disease and diseases of pulmonary circulation	DILGOM07	4769	29	17	1.43	0.1659	[1.03, 1.98]	0.0313442	0.0889889	FALSE	FALSE
AAT	I26	Pulmonary embolism	Meta-analysis	12281	65	28	1.23582	0.119222	[0.98, 1.56]	0.0757335	0.115346	FALSE	FALSE
AAT	I26	Pulmonary embolism	FINRISK97	7512	40	12	1.1	0.1636	[0.80, 1.52]	0.560226	0.440054	FALSE	FALSE
AAT	I26	Pulmonary embolism	DILGOM07	4769	25	16	1.41	0.1741	[1.00, 1.98]	0.048816	0.124734	FALSE	FALSE
AAT	I30-I52	Other forms of heart disease	Meta-analysis	12281	1009	459	1.04898	0.0338928	[0.98, 1.12]	0.15829	0.198443	FALSE	FALSE
AAT	I30-I52	Other forms of heart disease	FINRISK97	7512	542	177	1.09	0.0455	[0.99, 1.19]	0.0648207	0.174787	FALSE	FALSE
AAT	I30-I52	Other forms of heart disease	DILGOM07	4769	467	282	1	0.0508	[0.90, 1.10]	0.958159	0.646541	FALSE	FALSE
AAT	I30-I52	Other forms of heart disease	Training	615	57	<10	1.14	0.139932	[0.87, 1.49]	0.349081	0.523061	FALSE	FALSE
AAT	I30-I52	Other forms of heart disease	Immunoassayed	630	57	<10	1.1	0.16447	[0.80, 1.51]	0.562253	0.746578	FALSE	FALSE
AAT	I34	Nonrheumatic mitral valve disorders	Meta-analysis	12281	107	42	0.954683	0.10677	[0.77, 1.18]	0.66403	0.444458	FALSE	FALSE
AAT	I34	Nonrheumatic mitral valve disorders	FINRISK97	7512	51	5	0.99	0.1503	[0.74, 1.34]	0.971145	0.504199	FALSE	FALSE
AAT	I34	Nonrheumatic mitral valve disorders	DILGOM07	4769	56	37	0.92	0.1517	[0.69, 1.25]	0.606533	0.542732	FALSE	FALSE
AAT	I35	Nonrheumatic aortic valve disorders	Meta-analysis	12281	155	46	0.973814	0.0868352	[0.82, 1.15]	0.759924	0.471534	FALSE	FALSE
AAT	I35	Nonrheumatic aortic valve disorders	FINRISK97	7512	67	16	0.94	0.1326	[0.72, 1.21]	0.619102	0.446463	FALSE	FALSE
AAT	I35	Nonrheumatic aortic valve disorders	DILGOM07	4769	88	30	1	0.1149	[0.80, 1.25]	0.983151	0.652266	FALSE	FALSE
AAT	I42	Cardiomyopathy	Meta-analysis	12281	62	28	1.16078	0.13216	[0.90, 1.50]	0.259272	0.271482	FALSE	FALSE
AAT	I42	Cardiomyopathy	FINRISK97	7512	30	10	1.35	0.1845	[0.94, 1.94]	0.104478	0.212808	FALSE	FALSE
AAT	I42	Cardiomyopathy	DILGOM07	4769	32	18	0.99	0.1894	[0.69, 1.44]	0.972719	0.648384	FALSE	FALSE
AAT	I44	Atrioventricular and left bundle branch block	Meta-analysis	12281	58	17	1.11267	0.13569	[0.85, 1.45]	0.431376	0.361354	FALSE	FALSE
AAT	I44	Atrioventricular and left bundle branch block	FINRISK97	7512	30	6	1.42	0.182	[1.00, 2.03]	0.0521693	0.166553	FALSE	FALSE
AAT	I44	Atrioventricular and left bundle branch block	DILGOM07	4769	28	11	0.82	0.2036	[0.55, 1.22]	0.329146	0.40262	FALSE	FALSE
AAT	I48	Atrial fibrillation and flutter	Meta-analysis	12281	474	216	0.953882	0.0499204	[0.86, 1.05]	0.344246	0.320408	FALSE	FALSE
AAT	I48	Atrial fibrillation and flutter	FINRISK97	7512	240	98	0.9	0.0709	[0.79, 1.04]	0.154435	0.253643	FALSE	FALSE
AAT	I48	Atrial fibrillation and flutter	DILGOM07	4769	234	118	1.01	0.0703	[0.88, 1.16]	0.926044	0.633806	FALSE	FALSE
AAT	I48	Atrial fibrillation and flutter	Training	615	32	<10	1	0.189318	[0.69, 1.45]	0.991198	0.991198	FALSE	FALSE
AAT	I48	Atrial fibrillation and flutter	Immunoassayed	630	32	<10	1.05	0.229844	[0.69, 1.58]	0.831892	0.79382	FALSE	FALSE
AAT	I49	Other cardiac arrhythmias	Meta-analysis	12281	232	141	0.946559	0.0720632	[0.82, 1.09]	0.445979	0.366915	FALSE	FALSE
AAT	I49	Other cardiac arrhythmias	FINRISK97	7512	118	44	1.12	0.0935	[0.93, 1.34]	0.237774	0.3182	FALSE	FALSE
AAT	I49	Other cardiac arrhythmias	DILGOM07	4769	114	97	0.74	0.1131	[0.59, 0.92]	0.00711988	0.030321	FALSE	FALSE
AAT	I50	Heart failure	Meta-analysis	12281	195	35	1.59868	0.0650205	[1.41, 1.82]	5.35895e-13	9.87595e-11	TRUE	TRUE
AAT	I50	Heart failure	FINRISK97	7512	115	12	1.51	0.0903	[1.26, 1.80]	5.08482e-06	0.000153107	TRUE	TRUE
AAT	I50	Heart failure	DILGOM07	4769	80	23	1.7	0.0937	[1.41, 2.04]	1.55941e-08	3.58612e-06	TRUE	TRUE
AAT	I60-I69	Cerebrovascular diseases	Meta-analysis	12281	407	174	1.15341	0.0514254	[1.04, 1.28]	0.00551527	0.0172272	FALSE	FALSE
AAT	I60-I69	Cerebrovascular diseases	FINRISK97	7512	240	81	1.07	0.0686	[0.94, 1.22]	0.318122	0.346135	FALSE	FALSE
AAT	I60-I69	Cerebrovascular diseases	DILGOM07	4769	167	93	1.27	0.0777	[1.09, 1.48]	0.00195708	0.0128589	TRUE	FALSE
AAT	I63	Cerebral infarction	Meta-analysis	12281	272	47	1.22173	0.0623488	[1.08, 1.38]	0.00131812	0.00506071	TRUE	FALSE
AAT	I63	Cerebral infarction	FINRISK97	7512	177	8	1.16	0.0779	[0.99, 1.35]	0.0599671	0.171181	FALSE	FALSE
AAT	I63	Cerebral infarction	DILGOM07	4769	95	39	1.34	0.104	[1.09, 1.64]	0.0046868	0.0211335	FALSE	FALSE
AAT	I67	Other cerebrovascular diseases	Meta-analysis	12281	52	33	0.793145	0.153028	[0.59, 1.07]	0.12992	0.168611	FALSE	FALSE
AAT	I67	Other cerebrovascular diseases	FINRISK97	7512	25	13	0.65	0.2187	[0.42, 0.99]	0.0472706	0.164232	FALSE	FALSE
AAT	I67	Other cerebrovascular diseases	DILGOM07	4769	27	20	0.96	0.2142	[0.63, 1.46]	0.852577	0.612609	FALSE	FALSE
AAT	I69	Sequelae of cerebrovascular disease	Meta-analysis	12281	134	45	1.04687	0.0947834	[0.87, 1.26]	0.628905	0.436056	FALSE	FALSE
AAT	I69	Sequelae of cerebrovascular disease	FINRISK97	7512	82	17	1.08	0.1183	[0.86, 1.37]	0.494797	0.423658	FALSE	FALSE
AAT	I69	Sequelae of cerebrovascular disease	DILGOM07	4769	52	28	0.99	0.1584	[0.73, 1.35]	0.958707	0.646541	FALSE	FALSE
AAT	I70-I79	Diseases of arteries, arterioles and capillarie	Meta-analysis	12281	264	104	1.3854	0.0582276	[1.24, 1.55]	2.16238e-08	4.98129e-07	TRUE	TRUE
AAT	I70-I79	Diseases of arteries, arterioles and capillarie	FINRISK97	7512	152	54	1.39	0.0792	[1.19, 1.62]	3.67499e-05	0.000474241	TRUE	TRUE
AAT	I70-I79	Diseases of arteries, arterioles and capillarie	DILGOM07	4769	112	50	1.38	0.0859	[1.16, 1.63]	0.000200841	0.00250033	TRUE	TRUE
AAT	I70-I79	Diseases of arteries, arterioles and capillarie	Training	615	23	<10	1.55	0.173427	[1.10, 2.19]	0.0115033	0.0661438	FALSE	TRUE
AAT	I70-I79	Diseases of arteries, arterioles and capillarie	Immunoassayed	630	23	<10	1.88	0.24284	[1.17, 3.03]	0.00933479	0.161348	FALSE	TRUE
AAT	I70	Atherosclerosis	Meta-analysis	12281	175	64	1.52438	0.0696082	[1.33, 1.75]	1.39055e-09	4.27105e-08	TRUE	TRUE
AAT	I70	Atherosclerosis	FINRISK97	7512	113	35	1.49	0.0927	[1.24, 1.79]	1.55737e-05	0.000285076	TRUE	TRUE
AAT	I70	Atherosclerosis	DILGOM07	4769	62	29	1.57	0.1054	[1.27, 1.93]	2.00405e-05	0.000475967	TRUE	TRUE
AAT	I80-I89	Diseases of veins lymphatic vessels and lymph nodes not elsewhere classified	Meta-analysis	12281	720	841	1.05113	0.0405734	[0.97, 1.14]	0.219051	0.23936	FALSE	FALSE
AAT	I80-I89	Diseases of veins lymphatic vessels and lymph nodes not elsewhere classified	FINRISK97	7512	429	395	1.02	0.0523	[0.92, 1.13]	0.726699	0.469708	FALSE	FALSE
AAT	I80-I89	Diseases of veins lymphatic vessels and lymph nodes not elsewhere classified	DILGOM07	4769	291	446	1.1	0.0643	[0.97, 1.25]	0.145287	0.251212	FALSE	FALSE
AAT	I80-I89	Diseases of veins lymphatic vessels and lymph nodes not elsewhere classified	Training	615	38	<10	1.25	0.172018	[0.89, 1.75]	0.194559	0.372905	FALSE	FALSE
AAT	I80-I89	Diseases of veins lymphatic vessels and lymph nodes not elsewhere classified	Immunoassayed	630	39	<10	1.36	0.181712	[0.95, 1.95]	0.0906175	0.327071	FALSE	FALSE
AAT	I80	Phlebitis and thrombophlebitis	Meta-analysis	12281	123	84	1.30102	0.0870554	[1.10, 1.54]	0.00250434	0.00887543	TRUE	FALSE
AAT	I80	Phlebitis and thrombophlebitis	FINRISK97	7512	74	39	1.25	0.1128	[1.00, 1.55]	0.0521111	0.166553	FALSE	FALSE
AAT	I80	Phlebitis and thrombophlebitis	DILGOM07	4769	49	45	1.38	0.1369	[1.05, 1.80]	0.019412	0.061152	FALSE	FALSE
AAT	I83	Varicose veins of lower extremities	Meta-analysis	12281	267	482	0.94679	0.0689875	[0.83, 1.08]	0.428025	0.360184	FALSE	FALSE
AAT	I83	Varicose veins of lower extremities	FINRISK97	7512	189	240	0.92	0.0812	[0.78, 1.07]	0.282414	0.338366	FALSE	FALSE
AAT	I83	Varicose veins of lower extremities	DILGOM07	4769	78	242	1.02	0.1308	[0.79, 1.32]	0.859829	0.614074	FALSE	FALSE
AAT	I84	Haemorrhoids	Meta-analysis	12281	245	254	1.03717	0.0695347	[0.91, 1.19]	0.59966	0.428336	FALSE	FALSE
AAT	I84	Haemorrhoids	FINRISK97	7512	137	102	0.97	0.0928	[0.81, 1.16]	0.739528	0.469708	FALSE	FALSE
AAT	I84	Haemorrhoids	DILGOM07	4769	108	152	1.13	0.105	[0.92, 1.39]	0.249827	0.341975	FALSE	FALSE
AAT	I87	Other disorders of veins	Meta-analysis	12281	112	27	0.91	0.10875	[0.74, 1.13]	0.385818	0.341146	FALSE	FALSE
AAT	I87	Other disorders of veins	FINRISK97	7512	37	2	0.91	0.1823	[0.63, 1.29]	0.586932	0.443039	FALSE	FALSE
AAT	I87	Other disorders of veins	DILGOM07	4769	75	25	0.91	0.1355	[0.70, 1.19]	0.492563	0.48615	FALSE	FALSE
AAT	J00-J06	Acute respiratory infections	Meta-analysis	12281	256	435	1.19652	0.0614362	[1.06, 1.35]	0.00349529	0.0117117	TRUE	FALSE
AAT	J00-J06	Acute respiratory infections	FINRISK97	7512	158	162	1.23	0.0748	[1.06, 1.42]	0.00640066	0.0422266	FALSE	FALSE
AAT	J00-J06	Acute respiratory infections	DILGOM07	4769	98	273	1.13	0.1077	[0.91, 1.39]	0.265786	0.355555	FALSE	FALSE
AAT	J01	Acute sinusitis	Meta-analysis	12281	125	145	1.22212	0.0852709	[1.03, 1.44]	0.0186561	0.0452383	FALSE	FALSE
AAT	J01	Acute sinusitis	FINRISK97	7512	80	44	1.29	0.0993	[1.06, 1.56]	0.011332	0.0646693	FALSE	FALSE
AAT	J01	Acute sinusitis	DILGOM07	4769	45	101	1.05	0.1664	[0.76, 1.45]	0.77646	0.593802	FALSE	FALSE
AAT	J06	Acute upper respiratory infections of multiple and unspecified sites	Meta-analysis	12281	99	156	1.09447	0.103365	[0.89, 1.34]	0.3825	0.341146	FALSE	FALSE
AAT	J06	Acute upper respiratory infections of multiple and unspecified sites	FINRISK97	7512	58	53	1.13	0.1318	[0.87, 1.46]	0.357471	0.360683	FALSE	FALSE
AAT	J06	Acute upper respiratory infections of multiple and unspecified sites	DILGOM07	4769	41	103	1.04	0.1666	[0.75, 1.45]	0.792015	0.594032	FALSE	FALSE
AAT	J10-J18	Influenza and pneumonia	Meta-analysis	12281	451	244	1.36766	0.0455553	[1.25, 1.50]	6.28659e-12	5.79274e-10	TRUE	TRUE
AAT	J10-J18	Influenza and pneumonia	FINRISK97	7512	249	91	1.39	0.061	[1.23, 1.57]	5.9741e-08	1.0793e-05	TRUE	TRUE
AAT	J10-J18	Influenza and pneumonia	DILGOM07	4769	202	153	1.34	0.0685	[1.17, 1.53]	2.06973e-05	0.000475967	TRUE	TRUE
AAT	J10-J18	Influenza and pneumonia	Training	615	21	<10	1.55	0.195622	[1.06, 2.27]	0.0250704	0.092216	FALSE	TRUE
AAT	J10-J18	Influenza and pneumonia	Immunoassayed	630	22	<10	1.65	0.234103	[1.04, 2.61]	0.0324253	0.247026	FALSE	TRUE
AAT	J15	Bacterial pneumonia not elsewhere classified	Meta-analysis	12281	205	68	1.2366	0.06897	[1.08, 1.42]	0.0020765	0.0076535	TRUE	FALSE
AAT	J15	Bacterial pneumonia not elsewhere classified	FINRISK97	7512	145	16	1.28	0.0811	[1.10, 1.51]	0.0020371	0.0160013	TRUE	FALSE
AAT	J15	Bacterial pneumonia not elsewhere classified	DILGOM07	4769	60	52	1.13	0.1311	[0.87, 1.46]	0.356094	0.419499	FALSE	FALSE
AAT	J18	Pneumonia, unspecified organism	Meta-analysis	12281	314	156	1.35278	0.054501	[1.22, 1.51]	2.95365e-08	6.04806e-07	TRUE	TRUE
AAT	J18	Pneumonia, unspecified organism	FINRISK97	7512	145	66	1.39	0.0791	[1.19, 1.62]	3.0016e-05	0.000468508	TRUE	TRUE
AAT	J18	Pneumonia, unspecified organism	DILGOM07	4769	169	90	1.32	0.0752	[1.14, 1.53]	0.00019163	0.00250033	TRUE	TRUE
AAT	J20-J22	Other acute lower respiratory infections	Meta-analysis	12281	91	58	1.57841	0.0953636	[1.31, 1.90]	1.70076e-06	1.95895e-05	TRUE	FALSE
AAT	J20-J22	Other acute lower respiratory infections	FINRISK97	7512	54	23	1.64	0.1262	[1.28, 2.09]	9.77255e-05	0.00117703	TRUE	FALSE
AAT	J20-J22	Other acute lower respiratory infections	DILGOM07	4769	37	35	1.5	0.1456	[1.13, 2.00]	0.00519728	0.0229846	FALSE	FALSE
AAT	J20	Acute bronchitis	Meta-analysis	12281	79	56	1.53204	0.106378	[1.24, 1.89]	6.06555e-05	0.000465755	TRUE	FALSE
AAT	J20	Acute bronchitis	FINRISK97	7512	46	23	1.75	0.1348	[1.34, 2.28]	3.37124e-05	0.000468508	TRUE	FALSE
AAT	J20	Acute bronchitis	DILGOM07	4769	33	33	1.23	0.1732	[0.87, 1.72]	0.237111	0.33659	FALSE	FALSE
AAT	J30-J39	Other diseases of upper respiratory tract	Meta-analysis	12281	586	657	1.03596	0.0442646	[0.95, 1.13]	0.424738	0.359057	FALSE	FALSE
AAT	J30-J39	Other diseases of upper respiratory tract	FINRISK97	7512	364	260	1	0.0558	[0.89, 1.11]	0.940871	0.497021	FALSE	FALSE
AAT	J30-J39	Other diseases of upper respiratory tract	DILGOM07	4769	222	397	1.1	0.0727	[0.95, 1.26]	0.208081	0.312756	FALSE	FALSE
AAT	J30-J39	Other diseases of upper respiratory tract	Training	615	29	<10	1.47	0.188066	[1.02, 2.11]	0.040506	0.124219	FALSE	FALSE
AAT	J30-J39	Other diseases of upper respiratory tract	Immunoassayed	630	30	<10	1.16	0.191979	[0.79, 1.70]	0.43946	0.746578	FALSE	FALSE
AAT	J30	Vasomotor and allergic rhinitis	Meta-analysis	12281	101	75	0.964498	0.104934	[0.79, 1.18]	0.730488	0.467157	FALSE	FALSE
AAT	J30	Vasomotor and allergic rhinitis	FINRISK97	7512	62	23	0.85	0.1362	[0.65, 1.11]	0.232406	0.316115	FALSE	FALSE
AAT	J30	Vasomotor and allergic rhinitis	DILGOM07	4769	39	52	1.16	0.1646	[0.84, 1.60]	0.363011	0.419499	FALSE	FALSE
AAT	J31	Chronic rhinitis nasopharyngitis and pharyngitis	Meta-analysis	12281	83	41	0.864475	0.12301	[0.68, 1.10]	0.236449	0.253342	FALSE	FALSE
AAT	J31	Chronic rhinitis nasopharyngitis and pharyngitis	FINRISK97	7512	43	9	0.86	0.1657	[0.62, 1.20]	0.376267	0.360683	FALSE	FALSE
AAT	J31	Chronic rhinitis nasopharyngitis and pharyngitis	DILGOM07	4769	40	32	0.87	0.1836	[0.61, 1.25]	0.465928	0.480483	FALSE	FALSE
AAT	J32	Chronic sinusitis	Meta-analysis	12281	114	109	1.0194	0.102512	[0.83, 1.25]	0.851306	0.47971	FALSE	FALSE
AAT	J32	Chronic sinusitis	FINRISK97	7512	75	43	1.01	0.124	[0.79, 1.29]	0.926389	0.497021	FALSE	FALSE
AAT	J32	Chronic sinusitis	DILGOM07	4769	39	66	1.04	0.1822	[0.73, 1.49]	0.813718	0.603045	FALSE	FALSE
AAT	J33	Nasal polyp	Meta-analysis	12281	68	44	1.08374	0.12861	[0.84, 1.39]	0.531781	0.39837	FALSE	FALSE
AAT	J33	Nasal polyp	FINRISK97	7512	47	17	1.11	0.1519	[0.82, 1.49]	0.500221	0.423732	FALSE	FALSE
AAT	J33	Nasal polyp	DILGOM07	4769	21	27	1.02	0.2417	[0.63, 1.64]	0.939034	0.64079	FALSE	FALSE
AAT	J34	Other disorders of nose and nasal sinuses	Meta-analysis	12281	148	143	0.976028	0.0909932	[0.82, 1.17]	0.789734	0.474241	FALSE	FALSE
AAT	J34	Other disorders of nose and nasal sinuses	FINRISK97	7512	92	50	0.99	0.1124	[0.80, 1.24]	0.936849	0.497021	FALSE	FALSE
AAT	J34	Other disorders of nose and nasal sinuses	DILGOM07	4769	56	93	0.95	0.155	[0.70, 1.28]	0.730161	0.577018	FALSE	FALSE
AAT	J35	Chronic diseases of tonsils and adenoids	Meta-analysis	12281	77	203	0.97695	0.119409	[0.77, 1.23]	0.845162	0.47971	FALSE	FALSE
AAT	J35	Chronic diseases of tonsils and adenoids	FINRISK97	7512	49	82	0.87	0.1517	[0.65, 1.17]	0.366701	0.360683	FALSE	FALSE
AAT	J35	Chronic diseases of tonsils and adenoids	DILGOM07	4769	28	121	1.18	0.1936	[0.81, 1.72]	0.400562	0.443775	FALSE	FALSE
AAT	J38	Diseases of vocal cords and larynx not elsewhere classified	Meta-analysis	12281	55	51	1.22072	0.144938	[0.92, 1.62]	0.168808	0.208788	FALSE	FALSE
AAT	J38	Diseases of vocal cords and larynx not elsewhere classified	FINRISK97	7512	29	20	1.25	0.1889	[0.87, 1.81]	0.233045	0.316115	FALSE	FALSE
AAT	J38	Diseases of vocal cords and larynx not elsewhere classified	DILGOM07	4769	26	31	1.18	0.226	[0.76, 1.84]	0.453694	0.474092	FALSE	FALSE
AAT	J40-J47	Chronic lower respiratory diseases	Meta-analysis	12281	603	365	1.31294	0.0408804	[1.21, 1.42]	2.73725e-11	1.68148e-09	TRUE	TRUE
AAT	J40-J47	Chronic lower respiratory diseases	FINRISK97	7512	392	171	1.27	0.0495	[1.16, 1.40]	9.33827e-07	8.43543e-05	TRUE	TRUE
AAT	J40-J47	Chronic lower respiratory diseases	DILGOM07	4769	211	194	1.41	0.0725	[1.22, 1.62]	2.1498e-06	0.000123596	TRUE	TRUE
AAT	J40-J47	Chronic lower respiratory diseases	Training	615	25	<10	1.96	0.172688	[1.40, 2.75]	9.744e-05	0.00448224	TRUE	TRUE
AAT	J40-J47	Chronic lower respiratory diseases	Immunoassayed	630	25	<10	2.21	0.220052	[1.44, 3.40]	0.000313768	0.0119763	TRUE	TRUE
AAT	J44	Other chronic obstructive pulmonary disease	Meta-analysis	12281	186	51	1.54021	0.0704025	[1.34, 1.77]	8.5159e-10	3.13877e-08	TRUE	TRUE
AAT	J44	Other chronic obstructive pulmonary disease	FINRISK97	7512	129	28	1.44	0.0838	[1.22, 1.69]	1.57794e-05	0.000285076	TRUE	TRUE
AAT	J44	Other chronic obstructive pulmonary disease	DILGOM07	4769	57	23	1.81	0.1298	[1.40, 2.33]	5.21143e-06	0.000199742	TRUE	TRUE
AAT	J45	Asthma	Meta-analysis	12281	446	299	1.18411	0.0486253	[1.08, 1.30]	0.000510145	0.00223843	TRUE	FALSE
AAT	J45	Asthma	FINRISK97	7512	281	134	1.11	0.06	[0.98, 1.24]	0.0937687	0.207651	FALSE	FALSE
AAT	J45	Asthma	DILGOM07	4769	165	165	1.34	0.083	[1.14, 1.58]	0.000412155	0.00394924	TRUE	FALSE
AAT	J90-J94	Other diseases of pleura	Meta-analysis	12281	81	49	1.287	0.0976983	[1.06, 1.56]	0.00980719	0.0286882	FALSE	FALSE
AAT	J90-J94	Other diseases of pleura	FINRISK97	7512	56	28	1.19	0.1159	[0.95, 1.50]	0.131162	0.225678	FALSE	FALSE
AAT	J90-J94	Other diseases of pleura	DILGOM07	4769	25	21	1.56	0.1816	[1.09, 2.23]	0.013979	0.0472752	FALSE	FALSE
AAT	K00-K14	Diseases of oral cavity salivary glands and jaws	Meta-analysis	12281	323	196	1.10748	0.0568742	[0.99, 1.24]	0.0726581	0.112522	FALSE	FALSE
AAT	K00-K14	Diseases of oral cavity salivary glands and jaws	FINRISK97	7512	178	33	1.09	0.0761	[0.94, 1.26]	0.266635	0.32994	FALSE	FALSE
AAT	K00-K14	Diseases of oral cavity salivary glands and jaws	DILGOM07	4769	145	163	1.13	0.0856	[0.96, 1.34]	0.154325	0.259048	FALSE	FALSE
AAT	K02	Dental caries	Meta-analysis	12281	50	19	1.60015	0.127406	[1.25, 2.05]	0.00022446	0.00111798	TRUE	FALSE
AAT	K02	Dental caries	FINRISK97	7512	28	3	1.29	0.1818	[0.90, 1.84]	0.16768	0.263423	FALSE	FALSE
AAT	K02	Dental caries	DILGOM07	4769	22	16	1.97	0.1786	[1.39, 2.80]	0.000141219	0.00216504	TRUE	FALSE
AAT	K04	Diseases of pulp and periapical tissues	Meta-analysis	12281	79	35	1.27297	0.105146	[1.04, 1.56]	0.0217117	0.0493978	FALSE	FALSE
AAT	K04	Diseases of pulp and periapical tissues	FINRISK97	7512	42	8	1.26	0.1399	[0.96, 1.66]	0.0976975	0.207651	FALSE	FALSE
AAT	K04	Diseases of pulp and periapical tissues	DILGOM07	4769	37	27	1.29	0.1594	[0.94, 1.76]	0.109454	0.21331	FALSE	FALSE
AAT	K07	Dentofacial anomalies [including malocclusion]	Meta-analysis	12281	84	41	0.778755	0.123605	[0.61, 0.99]	0.0430685	0.0797748	FALSE	FALSE
AAT	K07	Dentofacial anomalies [including malocclusion]	FINRISK97	7512	49	2	0.82	0.1543	[0.60, 1.10]	0.185547	0.279347	FALSE	FALSE
AAT	K07	Dentofacial anomalies [including malocclusion]	DILGOM07	4769	35	39	0.71	0.2065	[0.47, 1.06]	0.0963941	0.191098	FALSE	FALSE
AAT	K08	Other disorders of teeth and supporting structures	Meta-analysis	12281	50	19	1.31227	0.138958	[1.00, 1.72]	0.0504993	0.0857434	FALSE	FALSE
AAT	K08	Other disorders of teeth and supporting structures	FINRISK97	7512	25	3	1.06	0.2123	[0.70, 1.61]	0.787792	0.469708	FALSE	FALSE
AAT	K08	Other disorders of teeth and supporting structures	DILGOM07	4769	25	16	1.54	0.1838	[1.07, 2.21]	0.0190121	0.0607241	FALSE	FALSE
AAT	K11	Diseases of salivary glands	Meta-analysis	12281	51	27	1.01485	0.14747	[0.76, 1.35]	0.92039	0.500347	FALSE	FALSE
AAT	K11	Diseases of salivary glands	FINRISK97	7512	27	3	0.98	0.198	[0.67, 1.45]	0.933331	0.497021	FALSE	FALSE
AAT	K11	Diseases of salivary glands	DILGOM07	4769	24	24	1.06	0.221	[0.69, 1.64]	0.780433	0.593802	FALSE	FALSE
AAT	K20-K31	Diseases of oesophagus stomach and duodenum	Meta-analysis	12281	584	358	1.11781	0.0435587	[1.03, 1.22]	0.0105614	0.0301633	FALSE	FALSE
AAT	K20-K31	Diseases of oesophagus stomach and duodenum	FINRISK97	7512	339	99	1.11	0.0559	[1.00, 1.24]	0.0541691	0.166553	FALSE	FALSE
AAT	K20-K31	Diseases of oesophagus stomach and duodenum	DILGOM07	4769	245	259	1.13	0.0695	[0.98, 1.29]	0.0894257	0.182527	FALSE	FALSE
AAT	K20-K31	Diseases of oesophagus stomach and duodenum	Training	615	25	<10	0.72	0.262633	[0.43, 1.21]	0.211004	0.388247	FALSE	FALSE
AAT	K20-K31	Diseases of oesophagus stomach and duodenum	Immunoassayed	630	26	<10	0.68	0.193845	[0.47, 0.99]	0.0466416	0.247026	FALSE	FALSE
AAT	K21	Gastro oesophageal reflux disease	Meta-analysis	12281	259	120	1.13886	0.0652869	[1.00, 1.29]	0.0464102	0.0812905	FALSE	FALSE
AAT	K21	Gastro oesophageal reflux disease	FINRISK97	7512	143	4	1.21	0.0843	[1.03, 1.43]	0.0218079	0.101023	FALSE	FALSE
AAT	K21	Gastro oesophageal reflux disease	DILGOM07	4769	116	116	1.04	0.1032	[0.85, 1.27]	0.70836	0.577018	FALSE	FALSE
AAT	K22	Other diseases of oesophagus	Meta-analysis	12281	52	40	1.27456	0.141017	[0.97, 1.68]	0.0853688	0.12586	FALSE	FALSE
AAT	K22	Other diseases of oesophagus	FINRISK97	7512	29	15	1.33	0.1757	[0.94, 1.88]	0.102927	0.212808	FALSE	FALSE
AAT	K22	Other diseases of oesophagus	DILGOM07	4769	23	25	1.18	0.2364	[0.74, 1.87]	0.485427	0.484992	FALSE	FALSE
AAT	K29	Gastritis and duodenitis	Meta-analysis	12281	195	123	1.09534	0.074164	[0.95, 1.27]	0.219502	0.23936	FALSE	FALSE
AAT	K29	Gastritis and duodenitis	FINRISK97	7512	116	38	0.98	0.0971	[0.81, 1.18]	0.794495	0.469708	FALSE	FALSE
AAT	K29	Gastritis and duodenitis	DILGOM07	4769	79	85	1.28	0.1149	[1.02, 1.60]	0.0312435	0.0889889	FALSE	FALSE
AAT	K30	Dyspepsia	Meta-analysis	12281	69	23	0.794146	0.137908	[0.61, 1.04]	0.0946593	0.133393	FALSE	FALSE
AAT	K30	Dyspepsia	FINRISK97	7512	33	1	0.69	0.1966	[0.47, 1.02]	0.0616999	0.171181	FALSE	FALSE
AAT	K30	Dyspepsia	DILGOM07	4769	36	22	0.91	0.1935	[0.62, 1.33]	0.622507	0.549157	FALSE	FALSE
AAT	K35-K38	Diseases of appendix	Meta-analysis	12281	113	284	1.04885	0.102528	[0.86, 1.28]	0.641782	0.440542	FALSE	FALSE
AAT	K35-K38	Diseases of appendix	FINRISK97	7512	70	128	1.12	0.1256	[0.87, 1.43]	0.380105	0.360683	FALSE	FALSE
AAT	K35-K38	Diseases of appendix	DILGOM07	4769	43	156	0.92	0.1775	[0.65, 1.31]	0.651944	0.559422	FALSE	FALSE
AAT	K35	Acute appendicitis	Meta-analysis	12281	112	269	1.03553	0.103251	[0.85, 1.27]	0.73525	0.467236	FALSE	FALSE
AAT	K35	Acute appendicitis	FINRISK97	7512	69	119	1.1	0.1269	[0.86, 1.41]	0.454961	0.402916	FALSE	FALSE
AAT	K35	Acute appendicitis	DILGOM07	4769	43	150	0.92	0.1776	[0.65, 1.31]	0.649568	0.559422	FALSE	FALSE
AAT	K40-K46	Hernia	Meta-analysis	12281	543	545	1.06098	0.0455987	[0.97, 1.16]	0.194229	0.227989	FALSE	FALSE
AAT	K40-K46	Hernia	FINRISK97	7512	326	234	1.01	0.0592	[0.90, 1.13]	0.881027	0.481991	FALSE	FALSE
AAT	K40-K46	Hernia	DILGOM07	4769	217	311	1.14	0.0715	[0.99, 1.31]	0.0681545	0.158316	FALSE	FALSE
AAT	K40-K46	Hernia	Training	615	31	<10	1.32	0.177052	[0.93, 1.87]	0.116862	0.298647	FALSE	FALSE
AAT	K40-K46	Hernia	Immunoassayed	630	31	<10	1.32	0.221304	[0.85, 2.05]	0.209652	0.500142	FALSE	FALSE
AAT	K40	Inguinal hernia	Meta-analysis	12281	341	421	0.993547	0.0587572	[0.89, 1.11]	0.912269	0.498875	FALSE	FALSE
AAT	K40	Inguinal hernia	FINRISK97	7512	221	190	0.98	0.0725	[0.85, 1.12]	0.733141	0.469708	FALSE	FALSE
AAT	K40	Inguinal hernia	DILGOM07	4769	120	231	1.02	0.1003	[0.84, 1.25]	0.818164	0.603045	FALSE	FALSE
AAT	K42	Umbilical hernia	Meta-analysis	12281	76	44	0.923331	0.12942	[0.72, 1.19]	0.537667	0.398965	FALSE	FALSE
AAT	K42	Umbilical hernia	FINRISK97	7512	40	18	0.95	0.1724	[0.68, 1.34]	0.779597	0.469708	FALSE	FALSE
AAT	K42	Umbilical hernia	DILGOM07	4769	36	26	0.89	0.1959	[0.60, 1.30]	0.535198	0.508949	FALSE	FALSE
AAT	K43	Ventral hernia	Meta-analysis	12281	62	39	1.29889	0.13151	[1.00, 1.68]	0.046757	0.0812905	FALSE	FALSE
AAT	K43	Ventral hernia	FINRISK97	7512	33	12	1.21	0.1762	[0.86, 1.71]	0.274113	0.336886	FALSE	FALSE
AAT	K43	Ventral hernia	DILGOM07	4769	29	27	1.42	0.1976	[0.96, 2.09]	0.0781905	0.168048	FALSE	FALSE
AAT	K44	Diaphragmatic hernia	Meta-analysis	12281	88	40	1.22921	0.103285	[1.00, 1.51]	0.0457079	0.0809948	FALSE	FALSE
AAT	K44	Diaphragmatic hernia	FINRISK97	7512	45	1	1.03	0.1521	[0.76, 1.38]	0.867288	0.481991	FALSE	FALSE
AAT	K44	Diaphragmatic hernia	DILGOM07	4769	43	39	1.43	0.1407	[1.08, 1.88]	0.0117506	0.0428926	FALSE	FALSE
AAT	K50-K52	Non-infective enteritis and colitis	Meta-analysis	12281	135	80	1.27199	0.0880204	[1.07, 1.51]	0.00627175	0.0186422	FALSE	FALSE
AAT	K50-K52	Non-infective enteritis and colitis	FINRISK97	7512	71	26	1.21	0.1232	[0.95, 1.55]	0.11522	0.218924	FALSE	FALSE
AAT	K50-K52	Non-infective enteritis and colitis	DILGOM07	4769	64	54	1.34	0.1258	[1.04, 1.71]	0.021297	0.0661838	FALSE	FALSE
AAT	K51	Ulcerative colitis	Meta-analysis	12281	78	50	1.25	0.117294	[0.99, 1.57]	0.0571156	0.0948268	FALSE	FALSE
AAT	K51	Ulcerative colitis	FINRISK97	7512	37	14	1.25	0.1704	[0.90, 1.75]	0.185081	0.279347	FALSE	FALSE
AAT	K51	Ulcerative colitis	DILGOM07	4769	41	36	1.25	0.1617	[0.91, 1.72]	0.167309	0.269059	FALSE	FALSE
AAT	K55-K63	Other diseases of intestines	Meta-analysis	12281	596	330	1.16603	0.0428123	[1.07, 1.27]	0.000333342	0.00153578	TRUE	FALSE
AAT	K55-K63	Other diseases of intestines	FINRISK97	7512	323	109	1.13	0.0582	[1.00, 1.26]	0.0410293	0.161141	FALSE	FALSE
AAT	K55-K63	Other diseases of intestines	DILGOM07	4769	273	221	1.21	0.0632	[1.07, 1.37]	0.00271348	0.0160002	TRUE	FALSE
AAT	K55-K63	Other diseases of intestines	Training	615	33	<10	1.61	0.157563	[1.18, 2.20]	0.00250698	0.025456	FALSE	FALSE
AAT	K55-K63	Other diseases of intestines	Immunoassayed	630	33	<10	1.34	0.206712	[0.89, 2.00]	0.156825	0.399062	FALSE	FALSE
AAT	K57	Diverticular disease of intestine	Meta-analysis	12281	281	111	1.26661	0.0599413	[1.13, 1.42]	8.04845e-05	0.000570477	TRUE	FALSE
AAT	K57	Diverticular disease of intestine	FINRISK97	7512	132	29	1.17	0.0898	[0.98, 1.39]	0.0841461	0.19743	FALSE	FALSE
AAT	K57	Diverticular disease of intestine	DILGOM07	4769	149	82	1.35	0.0805	[1.16, 1.59]	0.000168536	0.00242235	TRUE	FALSE
AAT	K57	Diverticular disease of intestine	Training	615	21	<10	1.77	0.213999	[1.16, 2.69]	0.00762713	0.0501211	FALSE	FALSE
AAT	K57	Diverticular disease of intestine	Immunoassayed	630	21	<10	1.54	0.277044	[0.90, 2.64]	0.119107	0.349712	FALSE	FALSE
AAT	K58	Irritable bowel syndrome	Meta-analysis	12281	59	36	1.03743	0.141912	[0.79, 1.37]	0.795686	0.474241	FALSE	FALSE
AAT	K58	Irritable bowel syndrome	FINRISK97	7512	31	5	0.99	0.198	[0.67, 1.45]	0.944273	0.497363	FALSE	FALSE
AAT	K58	Irritable bowel syndrome	DILGOM07	4769	28	31	1.09	0.2035	[0.73, 1.63]	0.668853	0.569679	FALSE	FALSE
AAT	K59	Other functional intestinal disorders	Meta-analysis	12281	98	43	1.02894	0.103236	[0.84, 1.26]	0.782265	0.474219	FALSE	FALSE
AAT	K59	Other functional intestinal disorders	FINRISK97	7512	58	16	1.06	0.131	[0.82, 1.37]	0.640423	0.446463	FALSE	FALSE
AAT	K59	Other functional intestinal disorders	DILGOM07	4769	40	27	0.98	0.1677	[0.71, 1.37]	0.918277	0.632933	FALSE	FALSE
AAT	K62	Other diseases of anus and rectum	Meta-analysis	12281	82	43	1.0452	0.117088	[0.83, 1.31]	0.705771	0.459596	FALSE	FALSE
AAT	K62	Other diseases of anus and rectum	FINRISK97	7512	45	10	1.14	0.1472	[0.85, 1.51]	0.389603	0.3666	FALSE	FALSE
AAT	K62	Other diseases of anus and rectum	DILGOM07	4769	37	33	0.9	0.1932	[0.62, 1.32]	0.598146	0.540032	FALSE	FALSE
AAT	K70-K77	Diseases of liver	Meta-analysis	12281	76	48	1.81118	0.109971	[1.46, 2.25]	6.61695e-08	1.21943e-06	TRUE	TRUE
AAT	K70-K77	Diseases of liver	FINRISK97	7512	42	15	1.69	0.1466	[1.27, 2.26]	0.000329657	0.00330873	TRUE	TRUE
AAT	K70-K77	Diseases of liver	DILGOM07	4769	34	33	1.98	0.1663	[1.43, 2.75]	3.80113e-05	0.000794666	TRUE	TRUE
AAT	K80-K87	Diseases of gallbladder biliary tract and pancreas	Meta-analysis	12281	311	359	1.13732	0.060352	[1.01, 1.28]	0.0329968	0.0675661	FALSE	FALSE
AAT	K80-K87	Diseases of gallbladder biliary tract and pancreas	FINRISK97	7512	179	163	1.15	0.0792	[0.98, 1.34]	0.0782831	0.188572	FALSE	FALSE
AAT	K80-K87	Diseases of gallbladder biliary tract and pancreas	DILGOM07	4769	132	196	1.12	0.0932	[0.93, 1.34]	0.224612	0.329001	FALSE	FALSE
AAT	K80	Cholelithiasis	Meta-analysis	12281	247	294	1.17973	0.0676889	[1.03, 1.35]	0.0146102	0.0390218	FALSE	FALSE
AAT	K80	Cholelithiasis	FINRISK97	7512	146	130	1.2	0.0874	[1.01, 1.43]	0.035324	0.14504	FALSE	FALSE
AAT	K80	Cholelithiasis	DILGOM07	4769	101	164	1.15	0.107	[0.93, 1.42]	0.196338	0.299014	FALSE	FALSE
AAT	K90-K93	Other diseases of the digestive system	Meta-analysis	12281	128	80	1.07914	0.0918872	[0.90, 1.29]	0.407191	0.353966	FALSE	FALSE
AAT	K90-K93	Other diseases of the digestive system	FINRISK97	7512	86	29	1.14	0.1099	[0.92, 1.41]	0.234466	0.316115	FALSE	FALSE
AAT	K90-K93	Other diseases of the digestive system	DILGOM07	4769	42	51	0.95	0.1675	[0.68, 1.32]	0.745662	0.585004	FALSE	FALSE
AAT	L00-L08	Infections of the skin and subcutaneous tissue	Meta-analysis	12281	118	112	1.38929	0.0888413	[1.17, 1.65]	0.000214846	0.00109983	TRUE	FALSE
AAT	L00-L08	Infections of the skin and subcutaneous tissue	FINRISK97	7512	79	40	1.29	0.1126	[1.03, 1.61]	0.0242117	0.104147	FALSE	FALSE
AAT	L00-L08	Infections of the skin and subcutaneous tissue	DILGOM07	4769	39	72	1.57	0.1446	[1.18, 2.08]	0.00190329	0.0128589	TRUE	FALSE
AAT	L20-L30	Dermatitis and eczema	Meta-analysis	12281	337	190	1.10558	0.0573061	[0.99, 1.24]	0.0798617	0.119892	FALSE	FALSE
AAT	L20-L30	Dermatitis and eczema	FINRISK97	7512	187	51	1.01	0.0779	[0.87, 1.18]	0.88691	0.481991	FALSE	FALSE
AAT	L20-L30	Dermatitis and eczema	DILGOM07	4769	150	139	1.23	0.0846	[1.04, 1.45]	0.0136035	0.046923	FALSE	FALSE
AAT	L20	Atopic dermatitis	Meta-analysis	12281	86	63	0.926257	0.114673	[0.74, 1.16]	0.504123	0.388721	FALSE	FALSE
AAT	L20	Atopic dermatitis	FINRISK97	7512	50	14	0.84	0.1506	[0.63, 1.13]	0.247825	0.319691	FALSE	FALSE
AAT	L20	Atopic dermatitis	DILGOM07	4769	36	49	1.06	0.1769	[0.75, 1.49]	0.757132	0.59022	FALSE	FALSE
AAT	L30	Other dermatitis	Meta-analysis	12281	201	73	1.17584	0.0738767	[1.02, 1.36]	0.0283386	0.0600286	FALSE	FALSE
AAT	L30	Other dermatitis	FINRISK97	7512	104	5	1.08	0.1023	[0.88, 1.32]	0.444695	0.397724	FALSE	FALSE
AAT	L30	Other dermatitis	DILGOM07	4769	97	68	1.29	0.1068	[1.05, 1.59]	0.017201	0.0565091	FALSE	FALSE
AAT	L40-L45	Papulosquamous disorders	Meta-analysis	12281	125	66	1.25933	0.0921525	[1.05, 1.51]	0.0123448	0.0339554	FALSE	FALSE
AAT	L40-L45	Papulosquamous disorders	FINRISK97	7512	62	10	0.95	0.138	[0.72, 1.24]	0.690758	0.463921	FALSE	FALSE
AAT	L40-L45	Papulosquamous disorders	DILGOM07	4769	63	56	1.58	0.1238	[1.24, 2.02]	0.000206579	0.00250033	TRUE	FALSE
AAT	L40	Psoriasis	Meta-analysis	12281	81	39	1.2585	0.112268	[1.01, 1.57]	0.0405636	0.077869	FALSE	FALSE
AAT	L40	Psoriasis	FINRISK97	7512	39	6	1.12	0.1655	[0.81, 1.54]	0.50886	0.423732	FALSE	FALSE
AAT	L40	Psoriasis	DILGOM07	4769	42	33	1.39	0.1528	[1.03, 1.88]	0.0296508	0.0863124	FALSE	FALSE
AAT	L50-L54	Urticaria and erythema	Meta-analysis	12281	78	64	1.09419	0.117313	[0.87, 1.38]	0.442895	0.366915	FALSE	FALSE
AAT	L50-L54	Urticaria and erythema	FINRISK97	7512	47	16	1.23	0.1409	[0.94, 1.63]	0.137174	0.229466	FALSE	FALSE
AAT	L50-L54	Urticaria and erythema	DILGOM07	4769	31	48	0.84	0.2118	[0.55, 1.27]	0.401386	0.443775	FALSE	FALSE
AAT	L50	Urticaria	Meta-analysis	12281	59	51	1.07028	0.14074	[0.81, 1.41]	0.629397	0.436056	FALSE	FALSE
AAT	L50	Urticaria	FINRISK97	7512	38	12	1.08	0.1708	[0.77, 1.51]	0.641646	0.446463	FALSE	FALSE
AAT	L50	Urticaria	DILGOM07	4769	21	39	1.05	0.2484	[0.65, 1.71]	0.839961	0.611502	FALSE	FALSE
AAT	L55-L59	Radiation-related disorders of the skin and subcutaneous tissue	Meta-analysis	12281	95	23	0.967113	0.115095	[0.77, 1.21]	0.771401	0.472294	FALSE	FALSE
AAT	L55-L59	Radiation-related disorders of the skin and subcutaneous tissue	FINRISK97	7512	29	2	0.68	0.204	[0.46, 1.02]	0.0625358	0.171181	FALSE	FALSE
AAT	L55-L59	Radiation-related disorders of the skin and subcutaneous tissue	DILGOM07	4769	66	21	1.14	0.1394	[0.86, 1.49]	0.359928	0.419499	FALSE	FALSE
AAT	L57	Skin changes due to chronic exposure to nonionising radiation	Meta-analysis	12281	94	19	0.977185	0.1156	[0.78, 1.23]	0.841755	0.47971	FALSE	FALSE
AAT	L57	Skin changes due to chronic exposure to nonionising radiation	FINRISK97	7512	29	1	0.68	0.204	[0.46, 1.02]	0.0625358	0.171181	FALSE	FALSE
AAT	L57	Skin changes due to chronic exposure to nonionising radiation	DILGOM07	4769	65	18	1.16	0.1403	[0.88, 1.52]	0.3018	0.38773	FALSE	FALSE
AAT	L60-L75	Disorders of skin appendages	Meta-analysis	12281	106	70	1.05838	0.103977	[0.86, 1.30]	0.585274	0.420545	FALSE	FALSE
AAT	L60-L75	Disorders of skin appendages	FINRISK97	7512	52	11	1.21	0.1405	[0.92, 1.59]	0.176079	0.269585	FALSE	FALSE
AAT	L60-L75	Disorders of skin appendages	DILGOM07	4769	54	59	0.9	0.1546	[0.66, 1.21]	0.477067	0.484992	FALSE	FALSE
AAT	L72	Follicular cysts of skin and subcutaneous tissue	Meta-analysis	12281	46	30	0.999866	0.158758	[0.73, 1.36]	0.999324	0.52504	FALSE	FALSE
AAT	L72	Follicular cysts of skin and subcutaneous tissue	FINRISK97	7512	22	3	1.08	0.2281	[0.69, 1.69]	0.734962	0.469708	FALSE	FALSE
AAT	L72	Follicular cysts of skin and subcutaneous tissue	DILGOM07	4769	24	27	0.93	0.2211	[0.60, 1.43]	0.725916	0.577018	FALSE	FALSE
AAT	L80-L99	Other disorders of the skin and subcutaneous tissue	Meta-analysis	12281	192	92	1.12712	0.0754517	[0.97, 1.31]	0.112746	0.151663	FALSE	FALSE
AAT	L80-L99	Other disorders of the skin and subcutaneous tissue	FINRISK97	7512	88	25	0.9	0.1159	[0.72, 1.13]	0.364149	0.360683	FALSE	FALSE
AAT	L80-L99	Other disorders of the skin and subcutaneous tissue	DILGOM07	4769	104	67	1.33	0.0994	[1.10, 1.62]	0.00385963	0.0188848	FALSE	FALSE
AAT	M05-M14	Inflammatory polyarthropathies	Meta-analysis	12281	327	213	1.35781	0.0468083	[1.24, 1.49]	6.38163e-11	2.94016e-09	TRUE	TRUE
AAT	M05-M14	Inflammatory polyarthropathies	FINRISK97	7512	179	81	1.33	0.0606	[1.18, 1.50]	2.82324e-06	0.000106361	TRUE	TRUE
AAT	M05-M14	Inflammatory polyarthropathies	DILGOM07	4769	148	132	1.4	0.0737	[1.21, 1.62]	4.22589e-06	0.000194362	TRUE	TRUE
AAT	M05	Seropositive rheumatoid arthritis	Meta-analysis	12281	140	77	1.3587	0.0728872	[1.18, 1.57]	2.60543e-05	0.000228644	TRUE	FALSE
AAT	M05	Seropositive rheumatoid arthritis	FINRISK97	7512	81	20	1.53	0.0911	[1.28, 1.83]	2.94361e-06	0.000106361	TRUE	FALSE
AAT	M05	Seropositive rheumatoid arthritis	DILGOM07	4769	59	57	1.1	0.1215	[0.87, 1.40]	0.430243	0.459293	FALSE	FALSE
AAT	M06	Other rheumatoid arthritis	Meta-analysis	12281	66	87	1.34945	0.109153	[1.09, 1.67]	0.00603932	0.0182456	FALSE	FALSE
AAT	M06	Other rheumatoid arthritis	FINRISK97	7512	37	47	1.24	0.1398	[0.94, 1.63]	0.122318	0.220984	FALSE	FALSE
AAT	M06	Other rheumatoid arthritis	DILGOM07	4769	29	40	1.54	0.1747	[1.10, 2.17]	0.0130442	0.0461496	FALSE	FALSE
AAT	M10	Gout	Meta-analysis	12281	55	24	1.3473	0.130654	[1.04, 1.74]	0.0225129	0.0499865	FALSE	FALSE
AAT	M10	Gout	FINRISK97	7512	27	9	1.75	0.1909	[1.21, 2.55]	0.00324398	0.0225411	FALSE	FALSE
AAT	M10	Gout	DILGOM07	4769	28	15	1.07	0.1792	[0.75, 1.52]	0.705524	0.577018	FALSE	FALSE
AAT	M13	Other arthritis	Meta-analysis	12281	76	43	1.1523	0.114011	[0.92, 1.44]	0.21374	0.238959	FALSE	FALSE
AAT	M13	Other arthritis	FINRISK97	7512	37	4	0.97	0.1745	[0.69, 1.36]	0.847251	0.476846	FALSE	FALSE
AAT	M13	Other arthritis	DILGOM07	4769	39	39	1.31	0.1506	[0.98, 1.76]	0.0728099	0.16578	FALSE	FALSE
AAT	M15-M19	Arthrosis	Meta-analysis	12281	899	499	0.961573	0.0368653	[0.89, 1.03]	0.287813	0.288265	FALSE	FALSE
AAT	M15-M19	Arthrosis	FINRISK97	7512	443	176	1.02	0.0507	[0.93, 1.13]	0.630039	0.446463	FALSE	FALSE
AAT	M15-M19	Arthrosis	DILGOM07	4769	456	323	0.9	0.0537	[0.81, 1.00]	0.0614737	0.147259	FALSE	FALSE
AAT	M15-M19	Arthrosis	Training	615	40	<10	1.14	0.163467	[0.82, 1.59]	0.42281	0.589371	FALSE	FALSE
AAT	M15-M19	Arthrosis	Immunoassayed	630	40	<10	1.08	0.183859	[0.75, 1.57]	0.675517	0.746578	FALSE	FALSE
AAT	M15	Polyarthrosis	Meta-analysis	12281	51	15	0.774628	0.164183	[0.56, 1.07]	0.119849	0.157764	FALSE	FALSE
AAT	M15	Polyarthrosis	FINRISK97	7512	22	1	0.94	0.2381	[0.59, 1.50]	0.788738	0.469708	FALSE	FALSE
AAT	M15	Polyarthrosis	DILGOM07	4769	29	14	0.65	0.2267	[0.42, 1.01]	0.0556875	0.137702	FALSE	FALSE
AAT	M16	Coxarthrosis [arthrosis of hip]	Meta-analysis	12281	264	86	1.14138	0.0650914	[1.00, 1.30]	0.0421911	0.0797748	FALSE	FALSE
AAT	M16	Coxarthrosis [arthrosis of hip]	FINRISK97	7512	133	12	1.24	0.0875	[1.04, 1.47]	0.0148699	0.0746235	FALSE	FALSE
AAT	M16	Coxarthrosis [arthrosis of hip]	DILGOM07	4769	131	74	1.03	0.0974	[0.85, 1.24]	0.784169	0.593802	FALSE	FALSE
AAT	M17	Gonarthrosis [arthrosis of knee]	Meta-analysis	12281	544	221	0.902599	0.0492205	[0.82, 0.99]	0.0373422	0.0739974	FALSE	FALSE
AAT	M17	Gonarthrosis [arthrosis of knee]	FINRISK97	7512	278	27	0.98	0.0653	[0.86, 1.11]	0.750669	0.469708	FALSE	FALSE
AAT	M17	Gonarthrosis [arthrosis of knee]	DILGOM07	4769	266	194	0.81	0.0749	[0.70, 0.94]	0.004507	0.0209892	FALSE	FALSE
AAT	M19	Other arthrosis	Meta-analysis	12281	143	250	1.09431	0.0891619	[0.92, 1.30]	0.312129	0.301162	FALSE	FALSE
AAT	M19	Other arthrosis	FINRISK97	7512	50	148	0.95	0.1512	[0.71, 1.28]	0.728282	0.469708	FALSE	FALSE
AAT	M19	Other arthrosis	DILGOM07	4769	93	102	1.18	0.1104	[0.95, 1.47]	0.130991	0.233515	FALSE	FALSE
AAT	M20-M25	Other joint disorders	Meta-analysis	12281	734	807	0.941858	0.04062	[0.87, 1.02]	0.140306	0.178323	FALSE	FALSE
AAT	M20-M25	Other joint disorders	FINRISK97	7512	441	290	0.93	0.0524	[0.84, 1.03]	0.16095	0.261147	FALSE	FALSE
AAT	M20-M25	Other joint disorders	DILGOM07	4769	293	517	0.96	0.0643	[0.85, 1.09]	0.539157	0.510238	FALSE	FALSE
AAT	M20-M25	Other joint disorders	Training	615	32	<10	1.35	0.155575	[1.00, 1.84]	0.0537306	0.154475	FALSE	FALSE
AAT	M20-M25	Other joint disorders	Immunoassayed	630	32	<10	1.21	0.204523	[0.81, 1.80]	0.351324	0.70578	FALSE	FALSE
AAT	M20	Acquired deformities of fingers and toes	Meta-analysis	12281	215	253	0.989502	0.0760074	[0.85, 1.15]	0.889572	0.49379	FALSE	FALSE
AAT	M20	Acquired deformities of fingers and toes	FINRISK97	7512	113	101	0.93	0.1048	[0.76, 1.14]	0.479037	0.416079	FALSE	FALSE
AAT	M20	Acquired deformities of fingers and toes	DILGOM07	4769	102	152	1.06	0.1104	[0.86, 1.32]	0.586391	0.534992	FALSE	FALSE
AAT	M23	Internal derangement of knee	Meta-analysis	12281	284	309	0.866363	0.0675406	[0.76, 0.99]	0.0336768	0.0682006	FALSE	FALSE
AAT	M23	Internal derangement of knee	FINRISK97	7512	171	97	0.84	0.0862	[0.71, 0.99]	0.042563	0.162841	FALSE	FALSE
AAT	M23	Internal derangement of knee	DILGOM07	4769	113	212	0.91	0.1087	[0.73, 1.13]	0.381903	0.434777	FALSE	FALSE
AAT	M25	Other joint disorders not elsewhere classified	Meta-analysis	12281	215	146	1.06311	0.0716475	[0.92, 1.22]	0.392991	0.343241	FALSE	FALSE
AAT	M25	Other joint disorders not elsewhere classified	FINRISK97	7512	150	22	1.06	0.0864	[0.89, 1.25]	0.510304	0.423732	FALSE	FALSE
AAT	M25	Other joint disorders not elsewhere classified	DILGOM07	4769	65	124	1.07	0.1282	[0.83, 1.37]	0.623265	0.549157	FALSE	FALSE
AAT	M30-M36	Systemic connective tissue disorders	Meta-analysis	12281	90	42	1.24122	0.108003	[1.00, 1.53]	0.0454089	0.0809948	FALSE	FALSE
AAT	M30-M36	Systemic connective tissue disorders	FINRISK97	7512	48	9	1.08	0.1503	[0.81, 1.46]	0.588549	0.443039	FALSE	FALSE
AAT	M30-M36	Systemic connective tissue disorders	DILGOM07	4769	42	33	1.44	0.1553	[1.06, 1.95]	0.0189627	0.0607241	FALSE	FALSE
AAT	M35	Other systemic involvement of connective tissue	Meta-analysis	12281	64	28	1.23936	0.127928	[0.96, 1.59]	0.093451	0.133393	FALSE	FALSE
AAT	M35	Other systemic involvement of connective tissue	FINRISK97	7512	35	6	1.12	0.1731	[0.80, 1.57]	0.515628	0.423732	FALSE	FALSE
AAT	M35	Other systemic involvement of connective tissue	DILGOM07	4769	29	22	1.4	0.1899	[0.96, 2.03]	0.0763366	0.167929	FALSE	FALSE
AAT	M40-M43	Deforming dorsopathies	Meta-analysis	12281	68	43	0.970337	0.130072	[0.75, 1.25]	0.816927	0.476426	FALSE	FALSE
AAT	M40-M43	Deforming dorsopathies	FINRISK97	7512	35	13	0.95	0.1865	[0.66, 1.36]	0.763082	0.469708	FALSE	FALSE
AAT	M40-M43	Deforming dorsopathies	DILGOM07	4769	33	30	0.99	0.1815	[0.69, 1.42]	0.96398	0.648195	FALSE	FALSE
AAT	M43	Other deforming dorsopathies	Meta-analysis	12281	55	33	0.972303	0.143646	[0.73, 1.29]	0.844975	0.47971	FALSE	FALSE
AAT	M43	Other deforming dorsopathies	FINRISK97	7512	27	11	1.02	0.207	[0.68, 1.53]	0.933044	0.497021	FALSE	FALSE
AAT	M43	Other deforming dorsopathies	DILGOM07	4769	28	22	0.93	0.1995	[0.63, 1.38]	0.717611	0.577018	FALSE	FALSE
AAT	M45-M49	Spondylopathies	Meta-analysis	12281	403	274	1.04111	0.0538433	[0.94, 1.16]	0.454358	0.370501	FALSE	FALSE
AAT	M45-M49	Spondylopathies	FINRISK97	7512	209	97	0.97	0.0735	[0.84, 1.12]	0.679333	0.461393	FALSE	FALSE
AAT	M45-M49	Spondylopathies	DILGOM07	4769	194	177	1.13	0.0791	[0.97, 1.32]	0.127685	0.233043	FALSE	FALSE
AAT	M45-M49	Spondylopathies	Training	615	23	<10	1	0.2692	[0.59, 1.71]	0.98566	0.991198	FALSE	FALSE
AAT	M45-M49	Spondylopathies	Immunoassayed	630	23	<10	0.96	0.251731	[0.60, 1.55]	0.871176	0.81103	FALSE	FALSE
AAT	M47	Spondylosis	Meta-analysis	12281	170	131	1.00212	0.0845643	[0.85, 1.18]	0.980035	0.520984	FALSE	FALSE
AAT	M47	Spondylosis	FINRISK97	7512	83	47	0.87	0.1204	[0.69, 1.10]	0.246664	0.319691	FALSE	FALSE
AAT	M47	Spondylosis	DILGOM07	4769	87	84	1.15	0.1188	[0.91, 1.45]	0.249602	0.341975	FALSE	FALSE
AAT	M48	Other spondylopathies	Meta-analysis	12281	232	113	0.955003	0.0714229	[0.83, 1.10]	0.519168	0.395359	FALSE	FALSE
AAT	M48	Other spondylopathies	FINRISK97	7512	123	39	0.82	0.0986	[0.68, 1.00]	0.0470916	0.164232	FALSE	FALSE
AAT	M48	Other spondylopathies	DILGOM07	4769	109	74	1.13	0.1036	[0.92, 1.38]	0.243171	0.338917	FALSE	FALSE
AAT	M50-M54	Other dorsopathies	Meta-analysis	12281	943	734	1.00327	0.0350937	[0.94, 1.07]	0.925968	0.501899	FALSE	FALSE
AAT	M50-M54	Other dorsopathies	FINRISK97	7512	553	283	0.97	0.0463	[0.88, 1.06]	0.472696	0.412556	FALSE	FALSE
AAT	M50-M54	Other dorsopathies	DILGOM07	4769	390	451	1.05	0.0538	[0.95, 1.17]	0.352072	0.419499	FALSE	FALSE
AAT	M50-M54	Other dorsopathies	Training	615	36	<10	1.27	0.164589	[0.92, 1.77]	0.146445	0.342921	FALSE	FALSE
AAT	M50-M54	Other dorsopathies	Immunoassayed	630	36	<10	1.07	0.179811	[0.75, 1.52]	0.706711	0.746578	FALSE	FALSE
AAT	M50	Cervical disk disorders	Meta-analysis	12281	90	55	1.12802	0.112567	[0.90, 1.41]	0.284561	0.287503	FALSE	FALSE
AAT	M50	Cervical disk disorders	FINRISK97	7512	41	11	1.24	0.1568	[0.91, 1.68]	0.172591	0.266996	FALSE	FALSE
AAT	M50	Cervical disk disorders	DILGOM07	4769	49	44	1.02	0.1617	[0.74, 1.39]	0.924597	0.633806	FALSE	FALSE
AAT	M51	Other intervertebral disk disorders	Meta-analysis	12281	473	418	1.02241	0.0495081	[0.93, 1.13]	0.654465	0.441797	FALSE	FALSE
AAT	M51	Other intervertebral disk disorders	FINRISK97	7512	284	165	0.99	0.0647	[0.87, 1.12]	0.862286	0.481991	FALSE	FALSE
AAT	M51	Other intervertebral disk disorders	DILGOM07	4769	189	253	1.07	0.0769	[0.92, 1.24]	0.388986	0.43636	FALSE	FALSE
AAT	M51	Other intervertebral disk disorders	Training	615	21	<10	1.06	0.243931	[0.66, 1.68]	0.811203	0.91013	FALSE	FALSE
AAT	M51	Other intervertebral disk disorders	Immunoassayed	630	21	<10	0.9	0.227768	[0.57, 1.42]	0.643666	0.746578	FALSE	FALSE
AAT	M53	Other dorsopathies not elsewhere classified	Meta-analysis	12281	115	85	1.03332	0.10015	[0.85, 1.26]	0.74345	0.468224	FALSE	FALSE
AAT	M53	Other dorsopathies not elsewhere classified	FINRISK97	7512	59	24	0.87	0.1429	[0.66, 1.16]	0.34554	0.358773	FALSE	FALSE
AAT	M53	Other dorsopathies not elsewhere classified	DILGOM07	4769	56	61	1.22	0.1404	[0.93, 1.61]	0.158038	0.261463	FALSE	FALSE
AAT	M54	Dorsalgia	Meta-analysis	12281	522	349	0.995074	0.0470807	[0.91, 1.09]	0.91646	0.499685	FALSE	FALSE
AAT	M54	Dorsalgia	FINRISK97	7512	304	120	0.97	0.0621	[0.86, 1.09]	0.573226	0.443039	FALSE	FALSE
AAT	M54	Dorsalgia	DILGOM07	4769	218	229	1.03	0.0722	[0.89, 1.18]	0.728925	0.577018	FALSE	FALSE
AAT	M54	Dorsalgia	Training	615	22	<10	1.32	0.212591	[0.87, 1.99]	0.191571	0.372905	FALSE	FALSE
AAT	M54	Dorsalgia	Immunoassayed	630	22	<10	1.09	0.230895	[0.70, 1.71]	0.708974	0.746578	FALSE	FALSE
AAT	M65-M68	Disorders of synovium and tendon	Meta-analysis	12281	170	154	1.0221	0.078748	[0.88, 1.19]	0.781328	0.474219	FALSE	FALSE
AAT	M65-M68	Disorders of synovium and tendon	FINRISK97	7512	75	52	0.94	0.125	[0.74, 1.20]	0.619882	0.446463	FALSE	FALSE
AAT	M65-M68	Disorders of synovium and tendon	DILGOM07	4769	95	102	1.08	0.1014	[0.89, 1.32]	0.440026	0.46418	FALSE	FALSE
AAT	M65	Synovitis and tenosynovitis	Meta-analysis	12281	77	57	1.10365	0.113975	[0.88, 1.38]	0.38689	0.341146	FALSE	FALSE
AAT	M65	Synovitis and tenosynovitis	FINRISK97	7512	35	19	1.07	0.1733	[0.76, 1.50]	0.704701	0.465501	FALSE	FALSE
AAT	M65	Synovitis and tenosynovitis	DILGOM07	4769	42	38	1.13	0.1513	[0.84, 1.52]	0.414676	0.451972	FALSE	FALSE
AAT	M67	Other disorders of synovium and tendon	Meta-analysis	12281	85	82	1.04281	0.118924	[0.83, 1.32]	0.724446	0.466809	FALSE	FALSE
AAT	M67	Other disorders of synovium and tendon	FINRISK97	7512	38	25	0.92	0.1796	[0.65, 1.31]	0.640408	0.446463	FALSE	FALSE
AAT	M67	Other disorders of synovium and tendon	DILGOM07	4769	47	57	1.15	0.1587	[0.85, 1.57]	0.36674	0.42169	FALSE	FALSE
AAT	M70-M79	Other soft tissue disorders	Meta-analysis	12281	897	579	1.00056	0.0367193	[0.93, 1.08]	0.987814	0.523112	FALSE	FALSE
AAT	M70-M79	Other soft tissue disorders	FINRISK97	7512	483	141	0.93	0.05	[0.84, 1.02]	0.13435	0.228982	FALSE	FALSE
AAT	M70-M79	Other soft tissue disorders	DILGOM07	4769	414	438	1.09	0.0541	[0.98, 1.21]	0.103111	0.202668	FALSE	FALSE
AAT	M70-M79	Other soft tissue disorders	Training	615	61	<10	1.13	0.132602	[0.87, 1.48]	0.356691	0.523061	FALSE	FALSE
AAT	M70-M79	Other soft tissue disorders	Immunoassayed	630	61	<10	0.92	0.145175	[0.70, 1.22]	0.56573	0.746578	FALSE	FALSE
AAT	M70	Soft tissue disorders related to use overuse and pressure	Meta-analysis	12281	65	27	1.29956	0.121113	[1.02, 1.65]	0.0305035	0.0631916	FALSE	FALSE
AAT	M70	Soft tissue disorders related to use overuse and pressure	FINRISK97	7512	36	1	1.08	0.1751	[0.77, 1.52]	0.665856	0.45703	FALSE	FALSE
AAT	M70	Soft tissue disorders related to use overuse and pressure	DILGOM07	4769	29	26	1.54	0.1677	[1.11, 2.14]	0.0102928	0.0401186	FALSE	FALSE
AAT	M72	Fibroblastic disorders	Meta-analysis	12281	77	72	0.85994	0.129192	[0.67, 1.11]	0.242819	0.257177	FALSE	FALSE
AAT	M72	Fibroblastic disorders	FINRISK97	7512	46	27	0.73	0.168	[0.52, 1.01]	0.0598781	0.171181	FALSE	FALSE
AAT	M72	Fibroblastic disorders	DILGOM07	4769	31	45	1.09	0.2021	[0.73, 1.62]	0.671329	0.569679	FALSE	FALSE
AAT	M75	Shoulder lesions	Meta-analysis	12281	407	259	1.00188	0.0549061	[0.90, 1.12]	0.97274	0.519609	FALSE	FALSE
AAT	M75	Shoulder lesions	FINRISK97	7512	211	50	0.97	0.075	[0.84, 1.12]	0.667848	0.45703	FALSE	FALSE
AAT	M75	Shoulder lesions	DILGOM07	4769	196	209	1.04	0.0806	[0.89, 1.22]	0.611515	0.54507	FALSE	FALSE
AAT	M75	Shoulder lesions	Training	615	21	<10	1.12	0.246565	[0.70, 1.78]	0.645781	0.742648	FALSE	FALSE
AAT	M75	Shoulder lesions	Immunoassayed	630	21	<10	1	0.243896	[0.62, 1.62]	0.988141	0.819929	FALSE	FALSE
AAT	M76	Enthesopathies of lower limb excluding foot	Meta-analysis	12281	51	44	0.951607	0.15216	[0.71, 1.28]	0.744427	0.468224	FALSE	FALSE
AAT	M76	Enthesopathies of lower limb excluding foot	FINRISK97	7512	21	11	0.94	0.2356	[0.59, 1.49]	0.794774	0.469708	FALSE	FALSE
AAT	M76	Enthesopathies of lower limb excluding foot	DILGOM07	4769	30	33	0.96	0.1993	[0.65, 1.42]	0.846313	0.611502	FALSE	FALSE
AAT	M77	Other enthesopathies	Meta-analysis	12281	91	91	0.862394	0.11816	[0.68, 1.09]	0.210242	0.238959	FALSE	FALSE
AAT	M77	Other enthesopathies	FINRISK97	7512	52	32	0.85	0.1548	[0.63, 1.15]	0.284792	0.338366	FALSE	FALSE
AAT	M77	Other enthesopathies	DILGOM07	4769	39	59	0.88	0.1829	[0.61, 1.26]	0.485036	0.484992	FALSE	FALSE
AAT	M79	Other soft tissue disorders not elsewhere classified	Meta-analysis	12281	259	133	1.07621	0.0659989	[0.95, 1.22]	0.265811	0.275202	FALSE	FALSE
AAT	M79	Other soft tissue disorders not elsewhere classified	FINRISK97	7512	146	26	0.96	0.0899	[0.80, 1.14]	0.616816	0.446463	FALSE	FALSE
AAT	M79	Other soft tissue disorders not elsewhere classified	DILGOM07	4769	113	107	1.23	0.0972	[1.02, 1.49]	0.032773	0.0907389	FALSE	FALSE
AAT	M79	Other soft tissue disorders not elsewhere classified	Training	615	25	<10	1.34	0.203739	[0.90, 1.98]	0.150861	0.342921	FALSE	FALSE
AAT	M79	Other soft tissue disorders not elsewhere classified	Immunoassayed	630	25	<10	0.88	0.204892	[0.58, 1.33]	0.532689	0.746578	FALSE	FALSE
AAT	M80-M85	Disorders of bone density and structure	Meta-analysis	12281	77	31	1.16541	0.119885	[0.92, 1.47]	0.201664	0.232278	FALSE	FALSE
AAT	M80-M85	Disorders of bone density and structure	FINRISK97	7512	31	6	0.84	0.1895	[0.58, 1.22]	0.362922	0.360683	FALSE	FALSE
AAT	M80-M85	Disorders of bone density and structure	DILGOM07	4769	46	25	1.45	0.1548	[1.07, 1.96]	0.0167985	0.0559868	FALSE	FALSE
AAT	N10-N16	Renal tubulo-interstitial diseases	Meta-analysis	12281	140	91	1.27467	0.0813098	[1.09, 1.49]	0.00283799	0.00968536	TRUE	FALSE
AAT	N10-N16	Renal tubulo-interstitial diseases	FINRISK97	7512	71	37	1.33	0.1141	[1.07, 1.67]	0.0114545	0.0646693	FALSE	FALSE
AAT	N10-N16	Renal tubulo-interstitial diseases	DILGOM07	4769	69	54	1.22	0.1159	[0.98, 1.54]	0.0809159	0.172296	FALSE	FALSE
AAT	N10	Acute tubulo interstitial nephritis	Meta-analysis	12281	113	69	1.26	0.0919238	[1.05, 1.51]	0.0119314	0.0333156	FALSE	FALSE
AAT	N10	Acute tubulo interstitial nephritis	FINRISK97	7512	58	29	1.26	0.1301	[0.98, 1.63]	0.0733817	0.188572	FALSE	FALSE
AAT	N10	Acute tubulo interstitial nephritis	DILGOM07	4769	55	40	1.26	0.1299	[0.98, 1.62]	0.0770956	0.167929	FALSE	FALSE
AAT	N20-N23	Urolithiasis	Meta-analysis	12281	83	110	0.92048	0.12309	[0.72, 1.17]	0.50084	0.387812	FALSE	FALSE
AAT	N20-N23	Urolithiasis	FINRISK97	7512	49	57	1.04	0.1575	[0.77, 1.42]	0.792994	0.469708	FALSE	FALSE
AAT	N20-N23	Urolithiasis	DILGOM07	4769	34	53	0.76	0.1973	[0.52, 1.12]	0.163883	0.266109	FALSE	FALSE
AAT	N20	Calculus of kidney and ureter	Meta-analysis	12281	75	105	0.960205	0.129015	[0.75, 1.24]	0.752946	0.468782	FALSE	FALSE
AAT	N20	Calculus of kidney and ureter	FINRISK97	7512	45	55	1.09	0.1637	[0.79, 1.50]	0.607157	0.446463	FALSE	FALSE
AAT	N20	Calculus of kidney and ureter	DILGOM07	4769	30	50	0.78	0.2096	[0.52, 1.18]	0.235223	0.33659	FALSE	FALSE
AAT	N30-N39	Other diseases of the urinary system	Meta-analysis	12281	359	243	1.11412	0.0549312	[1.00, 1.24]	0.0491485	0.0846497	FALSE	FALSE
AAT	N30-N39	Other diseases of the urinary system	FINRISK97	7512	206	75	1.06	0.071	[0.92, 1.21]	0.440803	0.396204	FALSE	FALSE
AAT	N30-N39	Other diseases of the urinary system	DILGOM07	4769	153	168	1.2	0.0867	[1.02, 1.43]	0.0324209	0.0907389	FALSE	FALSE
AAT	N30	Cystitis	Meta-analysis	12281	82	35	1.17849	0.115211	[0.94, 1.48]	0.154008	0.194397	FALSE	FALSE
AAT	N30	Cystitis	FINRISK97	7512	44	8	1.21	0.147	[0.91, 1.61]	0.196471	0.288578	FALSE	FALSE
AAT	N30	Cystitis	DILGOM07	4769	38	27	1.13	0.1855	[0.79, 1.63]	0.500313	0.486823	FALSE	FALSE
AAT	N39	Other disorders of urinary system	Meta-analysis	12281	250	179	1.11234	0.0660298	[0.98, 1.27]	0.106864	0.144808	FALSE	FALSE
AAT	N39	Other disorders of urinary system	FINRISK97	7512	147	55	1.04	0.0853	[0.88, 1.23]	0.62489	0.446463	FALSE	FALSE
AAT	N39	Other disorders of urinary system	DILGOM07	4769	103	124	1.23	0.1043	[1.01, 1.51]	0.0444729	0.114913	FALSE	FALSE
AAT	N40-N51	Diseases of male genital organs	Meta-analysis	12281	534	302	1.00823	0.044456	[0.92, 1.10]	0.853795	0.47971	FALSE	FALSE
AAT	N40-N51	Diseases of male genital organs	FINRISK97	7512	313	111	0.93	0.0603	[0.83, 1.05]	0.241086	0.319691	FALSE	FALSE
AAT	N40-N51	Diseases of male genital organs	DILGOM07	4769	221	191	1.11	0.0658	[0.97, 1.26]	0.116402	0.219413	FALSE	FALSE
AAT	N40-N51	Diseases of male genital organs	Training	615	26	<10	1.11	0.198487	[0.76, 1.62]	0.599043	0.726281	FALSE	FALSE
AAT	N40-N51	Diseases of male genital organs	Immunoassayed	630	26	<10	1.14	0.232467	[0.72, 1.81]	0.572997	0.746578	FALSE	FALSE
AAT	N40	Hyperplasia of prostate	Meta-analysis	12281	415	178	0.972473	0.0509849	[0.88, 1.07]	0.584046	0.420545	FALSE	FALSE
AAT	N40	Hyperplasia of prostate	FINRISK97	7512	240	63	0.92	0.0689	[0.81, 1.06]	0.25659	0.32251	FALSE	FALSE
AAT	N40	Hyperplasia of prostate	DILGOM07	4769	175	115	1.04	0.0758	[0.90, 1.21]	0.598819	0.540032	FALSE	FALSE
AAT	N40	Hyperplasia of prostate	Training	615	24	<10	1.13	0.213176	[0.75, 1.70]	0.56643	0.726281	FALSE	FALSE
AAT	N40	Hyperplasia of prostate	Immunoassayed	630	24	<10	1.16	0.257096	[0.70, 1.93]	0.563741	0.746578	FALSE	FALSE
AAT	N60-N64	Disorders of breast	Meta-analysis	12281	98	117	1.02299	0.108831	[0.83, 1.27]	0.834572	0.47971	FALSE	FALSE
AAT	N60-N64	Disorders of breast	FINRISK97	7512	55	39	0.88	0.1467	[0.66, 1.17]	0.377365	0.360683	FALSE	FALSE
AAT	N60-N64	Disorders of breast	DILGOM07	4769	43	78	1.23	0.1623	[0.89, 1.69]	0.20683	0.312756	FALSE	FALSE
AAT	N70-N77	Inflammatory diseases of female pelvic organs	Meta-analysis	12281	85	187	0.893288	0.111564	[0.72, 1.11]	0.31178	0.301162	FALSE	FALSE
AAT	N70-N77	Inflammatory diseases of female pelvic organs	FINRISK97	7512	54	79	0.89	0.1363	[0.68, 1.16]	0.396256	0.370927	FALSE	FALSE
AAT	N70-N77	Inflammatory diseases of female pelvic organs	DILGOM07	4769	31	108	0.9	0.1942	[0.62, 1.32]	0.603458	0.54209	FALSE	FALSE
AAT	N80-N98	Noninflammatory disorders of female genital tract	Meta-analysis	12281	909	1154	0.973315	0.0361068	[0.91, 1.04]	0.453806	0.370501	FALSE	FALSE
AAT	N80-N98	Noninflammatory disorders of female genital tract	FINRISK97	7512	591	500	0.97	0.0442	[0.89, 1.05]	0.430557	0.389615	FALSE	FALSE
AAT	N80-N98	Noninflammatory disorders of female genital tract	DILGOM07	4769	318	654	0.98	0.0626	[0.86, 1.10]	0.696784	0.577018	FALSE	FALSE
AAT	N80-N98	Noninflammatory disorders of female genital tract	Training	615	28	<10	1	0.219787	[0.65, 1.55]	0.990644	0.991198	FALSE	FALSE
AAT	N80-N98	Noninflammatory disorders of female genital tract	Immunoassayed	630	28	<10	1.1	0.201598	[0.75, 1.61]	0.636374	0.746578	FALSE	FALSE
AAT	N81	Female genital prolapse	Meta-analysis	12281	181	164	0.999407	0.0861535	[0.84, 1.18]	0.994503	0.52504	FALSE	FALSE
AAT	N81	Female genital prolapse	FINRISK97	7512	101	69	1.08	0.1093	[0.87, 1.34]	0.46957	0.411817	FALSE	FALSE
AAT	N81	Female genital prolapse	DILGOM07	4769	80	95	0.88	0.14	[0.67, 1.16]	0.358147	0.419499	FALSE	FALSE
AAT	N83	Noninflammatory disorders of ovary Fallopian tube and broad ligament	Meta-analysis	12281	171	199	0.883328	0.0840351	[0.75, 1.04]	0.139869	0.178323	FALSE	FALSE
AAT	N83	Noninflammatory disorders of ovary Fallopian tube and broad ligament	FINRISK97	7512	110	84	0.87	0.1033	[0.71, 1.06]	0.167303	0.263423	FALSE	FALSE
AAT	N83	Noninflammatory disorders of ovary Fallopian tube and broad ligament	DILGOM07	4769	61	115	0.91	0.1445	[0.69, 1.21]	0.535581	0.508949	FALSE	FALSE
AAT	N84	Polyp of female genital tract	Meta-analysis	12281	155	146	0.887882	0.0901563	[0.74, 1.06]	0.187168	0.22398	FALSE	FALSE
AAT	N84	Polyp of female genital tract	FINRISK97	7512	109	45	0.86	0.107	[0.69, 1.06]	0.146119	0.242187	FALSE	FALSE
AAT	N84	Polyp of female genital tract	DILGOM07	4769	46	101	0.96	0.1674	[0.69, 1.33]	0.787864	0.594032	FALSE	FALSE
AAT	N85	Other noninflammatory disorders of uterus except cervix	Meta-analysis	12281	56	83	0.904709	0.145634	[0.68, 1.20]	0.491689	0.382333	FALSE	FALSE
AAT	N85	Other noninflammatory disorders of uterus except cervix	FINRISK97	7512	35	29	0.89	0.1839	[0.62, 1.28]	0.525489	0.423825	FALSE	FALSE
AAT	N85	Other noninflammatory disorders of uterus except cervix	DILGOM07	4769	21	54	0.93	0.2385	[0.58, 1.48]	0.759997	0.590451	FALSE	FALSE
AAT	N87	Dysplasia of cervix uteri	Meta-analysis	12281	57	40	0.922045	0.135023	[0.71, 1.20]	0.547777	0.402188	FALSE	FALSE
AAT	N87	Dysplasia of cervix uteri	FINRISK97	7512	29	9	0.69	0.1875	[0.48, 1.00]	0.0518838	0.166553	FALSE	FALSE
AAT	N87	Dysplasia of cervix uteri	DILGOM07	4769	28	31	1.26	0.1946	[0.86, 1.84]	0.241132	0.338124	FALSE	FALSE
AAT	N92	Excessive frequent and irregular menstruation	Meta-analysis	12281	237	425	0.913912	0.072378	[0.79, 1.05]	0.213585	0.238959	FALSE	FALSE
AAT	N92	Excessive frequent and irregular menstruation	FINRISK97	7512	159	184	0.93	0.0875	[0.78, 1.10]	0.401141	0.371649	FALSE	FALSE
AAT	N92	Excessive frequent and irregular menstruation	DILGOM07	4769	78	241	0.88	0.1288	[0.68, 1.13]	0.322059	0.399775	FALSE	FALSE
AAT	N95	Menopausal and other perimenopausal disorders	Meta-analysis	12281	144	116	1.03327	0.0926794	[0.86, 1.24]	0.723951	0.466809	FALSE	FALSE
AAT	N95	Menopausal and other perimenopausal disorders	FINRISK97	7512	90	42	1.03	0.1131	[0.83, 1.29]	0.777381	0.469708	FALSE	FALSE
AAT	N95	Menopausal and other perimenopausal disorders	DILGOM07	4769	54	74	1.04	0.1617	[0.76, 1.43]	0.797888	0.594032	FALSE	FALSE
AAT	O00-O08	Pregnancy with abortive outcome	Meta-analysis	12281	206	595	0.990492	0.0685941	[0.87, 1.13]	0.889237	0.49379	FALSE	FALSE
AAT	O00-O08	Pregnancy with abortive outcome	FINRISK97	7512	147	314	1.03	0.0814	[0.88, 1.21]	0.706262	0.465501	FALSE	FALSE
AAT	O00-O08	Pregnancy with abortive outcome	DILGOM07	4769	59	281	0.9	0.1274	[0.70, 1.16]	0.428642	0.459293	FALSE	FALSE
AAT	O02	Other abnormal products of conception	Meta-analysis	12281	89	138	1.04872	0.102655	[0.86, 1.28]	0.643044	0.440542	FALSE	FALSE
AAT	O02	Other abnormal products of conception	FINRISK97	7512	67	62	1.14	0.1168	[0.91, 1.44]	0.249505	0.319691	FALSE	FALSE
AAT	O02	Other abnormal products of conception	DILGOM07	4769	22	76	0.79	0.2152	[0.52, 1.20]	0.265933	0.355555	FALSE	FALSE
AAT	O04	Medical abortion	Meta-analysis	12281	79	292	1	0.110544	[0.81, 1.24]	1	0.52504	FALSE	FALSE
AAT	O04	Medical abortion	FINRISK97	7512	53	158	1	0.1361	[0.77, 1.31]	0.993785	0.511512	FALSE	FALSE
AAT	O04	Medical abortion	DILGOM07	4769	26	134	1	0.1895	[0.69, 1.45]	0.999717	0.654989	FALSE	FALSE
AAT	O10-O16	Oedema proteinuria and hypertensive disorders in pregnancy childbirth and the puerperium	Meta-analysis	12281	73	139	1.03071	0.114334	[0.82, 1.29]	0.791356	0.474241	FALSE	FALSE
AAT	O10-O16	Oedema proteinuria and hypertensive disorders in pregnancy childbirth and the puerperium	FINRISK97	7512	47	60	1.13	0.1404	[0.86, 1.49]	0.380823	0.360683	FALSE	FALSE
AAT	O10-O16	Oedema proteinuria and hypertensive disorders in pregnancy childbirth and the puerperium	DILGOM07	4769	26	79	0.86	0.197	[0.59, 1.27]	0.455607	0.474092	FALSE	FALSE
AAT	O20-O29	Other maternal disorders predominantly related to pregnancy	Meta-analysis	12281	150	230	1.01541	0.0817836	[0.87, 1.19]	0.851673	0.47971	FALSE	FALSE
AAT	O20-O29	Other maternal disorders predominantly related to pregnancy	FINRISK97	7512	96	95	1.17	0.0998	[0.96, 1.42]	0.118754	0.218924	FALSE	FALSE
AAT	O20-O29	Other maternal disorders predominantly related to pregnancy	DILGOM07	4769	54	135	0.76	0.1427	[0.58, 1.01]	0.05663	0.138543	FALSE	FALSE
AAT	O24	Diabetes mellitus in pregnancy	Meta-analysis	12281	77	99	0.963253	0.116597	[0.77, 1.21]	0.748134	0.468782	FALSE	FALSE
AAT	O24	Diabetes mellitus in pregnancy	FINRISK97	7512	51	41	1.03	0.1404	[0.78, 1.35]	0.84671	0.476846	FALSE	FALSE
AAT	O24	Diabetes mellitus in pregnancy	DILGOM07	4769	26	58	0.83	0.2093	[0.55, 1.26]	0.383817	0.434795	FALSE	FALSE
AAT	O30-O48	Maternal care related to the foetus and amniotic cavity and possible delivery problems	Meta-analysis	12281	279	622	0.958417	0.0584202	[0.85, 1.07]	0.46722	0.374363	FALSE	FALSE
AAT	O30-O48	Maternal care related to the foetus and amniotic cavity and possible delivery problems	FINRISK97	7512	182	291	0.98	0.0726	[0.85, 1.13]	0.824647	0.476704	FALSE	FALSE
AAT	O30-O48	Maternal care related to the foetus and amniotic cavity and possible delivery problems	DILGOM07	4769	97	331	0.92	0.0984	[0.76, 1.12]	0.396409	0.442528	FALSE	FALSE
AAT	O42	Premature rupture of membranes	Meta-analysis	12281	44	69	0.957411	0.147467	[0.72, 1.28]	0.767892	0.472294	FALSE	FALSE
AAT	O42	Premature rupture of membranes	FINRISK97	7512	23	27	0.89	0.2085	[0.59, 1.34]	0.584851	0.443039	FALSE	FALSE
AAT	O42	Premature rupture of membranes	DILGOM07	4769	21	42	1.03	0.2086	[0.69, 1.55]	0.875358	0.619393	FALSE	FALSE
AAT	O47	False labour	Meta-analysis	12281	103	217	0.906715	0.0960744	[0.75, 1.09]	0.308069	0.30039	FALSE	FALSE
AAT	O47	False labour	FINRISK97	7512	67	101	0.9	0.1181	[0.72, 1.14]	0.378916	0.360683	FALSE	FALSE
AAT	O47	False labour	DILGOM07	4769	36	116	0.92	0.1652	[0.67, 1.27]	0.614206	0.545354	FALSE	FALSE
AAT	O60-O75	Complications of labour and delivery	Meta-analysis	12281	190	431	0.979756	0.0692413	[0.86, 1.12]	0.767709	0.472294	FALSE	FALSE
AAT	O60-O75	Complications of labour and delivery	FINRISK97	7512	131	192	0.97	0.0845	[0.82, 1.15]	0.731125	0.469708	FALSE	FALSE
AAT	O60-O75	Complications of labour and delivery	DILGOM07	4769	59	239	1	0.1208	[0.79, 1.27]	0.989888	0.652266	FALSE	FALSE
AAT	O68	Labour and delivery complicated by foetal stress [distress]	Meta-analysis	12281	61	104	1.10212	0.118047	[0.87, 1.39]	0.410088	0.35481	FALSE	FALSE
AAT	O68	Labour and delivery complicated by foetal stress [distress]	FINRISK97	7512	37	47	1.02	0.1567	[0.75, 1.39]	0.881043	0.481991	FALSE	FALSE
AAT	O68	Labour and delivery complicated by foetal stress [distress]	DILGOM07	4769	24	57	1.22	0.1795	[0.86, 1.74]	0.265394	0.355555	FALSE	FALSE
AAT	O80-O84	Delivery	Meta-analysis	12281	531	1311	0.959885	0.042455	[0.88, 1.04]	0.334865	0.314856	FALSE	FALSE
AAT	O80-O84	Delivery	FINRISK97	7512	360	672	0.98	0.0518	[0.88, 1.08]	0.626375	0.446463	FALSE	FALSE
AAT	O80-O84	Delivery	DILGOM07	4769	171	639	0.92	0.0741	[0.80, 1.07]	0.280719	0.369452	FALSE	FALSE
AAT	O80	Single spontaneous delivery	Meta-analysis	12281	435	1247	0.979669	0.0466696	[0.89, 1.07]	0.659842	0.443801	FALSE	FALSE
AAT	O80	Single spontaneous delivery	FINRISK97	7512	291	654	1	0.0571	[0.89, 1.12]	0.975776	0.504199	FALSE	FALSE
AAT	O80	Single spontaneous delivery	DILGOM07	4769	144	593	0.94	0.081	[0.81, 1.11]	0.48208	0.484992	FALSE	FALSE
AAT	O82	Single delivery by Caesarean section	Meta-analysis	12281	84	61	0.811833	0.109207	[0.66, 1.01]	0.0562798	0.0942886	FALSE	FALSE
AAT	O82	Single delivery by Caesarean section	FINRISK97	7512	62	15	0.83	0.1262	[0.65, 1.06]	0.13083	0.225678	FALSE	FALSE
AAT	O82	Single delivery by Caesarean section	DILGOM07	4769	22	46	0.76	0.2179	[0.50, 1.17]	0.21036	0.314062	FALSE	FALSE
AAT	O95-O99	Other obstetric conditions not elsewhere classified	Meta-analysis	12281	57	55	1.03616	0.121705	[0.82, 1.32]	0.770402	0.472294	FALSE	FALSE
AAT	O95-O99	Other obstetric conditions not elsewhere classified	FINRISK97	7512	36	16	1.1	0.1492	[0.82, 1.47]	0.524574	0.423825	FALSE	FALSE
AAT	O95-O99	Other obstetric conditions not elsewhere classified	DILGOM07	4769	21	39	0.92	0.2104	[0.61, 1.38]	0.678969	0.571942	FALSE	FALSE
AAT	O99	Other maternal diseases classifiable elsewhere but complicating pregnancy childbirth and the puerperium	Meta-analysis	12281	55	49	1.00296	0.1239	[0.79, 1.28]	0.980968	0.520984	FALSE	FALSE
AAT	O99	Other maternal diseases classifiable elsewhere but complicating pregnancy childbirth and the puerperium	FINRISK97	7512	34	13	1.05	0.1533	[0.78, 1.42]	0.747971	0.469708	FALSE	FALSE
AAT	O99	Other maternal diseases classifiable elsewhere but complicating pregnancy childbirth and the puerperium	DILGOM07	4769	21	36	0.92	0.2104	[0.61, 1.38]	0.678969	0.571942	FALSE	FALSE
AAT	R00-R09	Symptoms and signs involving the circulatory and respiratory systems	Meta-analysis	12281	1203	770	1.00785	0.0314241	[0.95, 1.07]	0.803429	0.476087	FALSE	FALSE
AAT	R00-R09	Symptoms and signs involving the circulatory and respiratory systems	FINRISK97	7512	707	247	1	0.0404	[0.93, 1.09]	0.909754	0.490625	FALSE	FALSE
AAT	R00-R09	Symptoms and signs involving the circulatory and respiratory systems	DILGOM07	4769	496	523	1.02	0.05	[0.92, 1.12]	0.721515	0.577018	FALSE	FALSE
AAT	R00-R09	Symptoms and signs involving the circulatory and respiratory systems	Training	615	48	<10	1.08	0.153349	[0.80, 1.46]	0.61576	0.726281	FALSE	FALSE
AAT	R00-R09	Symptoms and signs involving the circulatory and respiratory systems	Immunoassayed	630	48	<10	0.99	0.12896	[0.73, 1.34]	0.937881	0.813598	FALSE	FALSE
AAT	R00	Abnormalities of heart beat	Meta-analysis	12281	91	34	0.891293	0.118101	[0.71, 1.12]	0.329838	0.311721	FALSE	FALSE
AAT	R00	Abnormalities of heart beat	FINRISK97	7512	52	3	1.03	0.1463	[0.77, 1.37]	0.836445	0.476704	FALSE	FALSE
AAT	R00	Abnormalities of heart beat	DILGOM07	4769	39	31	0.68	0.2001	[0.46, 1.00]	0.052071	0.130158	FALSE	FALSE
AAT	R04	Haemorrhage from respiratory passages	Meta-analysis	12281	111	77	1.15448	0.0963627	[0.96, 1.39]	0.136029	0.175305	FALSE	FALSE
AAT	R04	Haemorrhage from respiratory passages	FINRISK97	7512	72	35	1.1	0.1222	[0.87, 1.40]	0.431316	0.389615	FALSE	FALSE
AAT	R04	Haemorrhage from respiratory passages	DILGOM07	4769	39	42	1.25	0.1567	[0.92, 1.70]	0.149861	0.255282	FALSE	FALSE
AAT	R05	Cough	Meta-analysis	12281	136	91	0.956312	0.0949668	[0.79, 1.15]	0.638082	0.440417	FALSE	FALSE
AAT	R05	Cough	FINRISK97	7512	83	22	1.02	0.1162	[0.82, 1.29]	0.833947	0.476704	FALSE	FALSE
AAT	R05	Cough	DILGOM07	4769	53	69	0.84	0.1648	[0.61, 1.16]	0.294262	0.380171	FALSE	FALSE
AAT	R06	Abnormalities of breathing	Meta-analysis	12281	468	311	1.04104	0.0494715	[0.94, 1.15]	0.416223	0.356769	FALSE	FALSE
AAT	R06	Abnormalities of breathing	FINRISK97	7512	286	92	0.94	0.0641	[0.83, 1.06]	0.30538	0.340562	FALSE	FALSE
AAT	R06	Abnormalities of breathing	DILGOM07	4769	182	219	1.21	0.0778	[1.04, 1.41]	0.0129993	0.0461496	FALSE	FALSE
AAT	R07	Pain in throat and chest	Meta-analysis	12281	500	317	0.966668	0.0492104	[0.88, 1.06]	0.490896	0.382333	FALSE	FALSE
AAT	R07	Pain in throat and chest	FINRISK97	7512	283	110	1.03	0.0637	[0.91, 1.17]	0.632511	0.446463	FALSE	FALSE
AAT	R07	Pain in throat and chest	DILGOM07	4769	217	207	0.88	0.0775	[0.76, 1.03]	0.112773	0.214331	FALSE	FALSE
AAT	R07	Pain in throat and chest	Training	615	26	<10	0.99	0.313306	[0.64, 1.54]	0.97441	0.991198	FALSE	FALSE
AAT	R07	Pain in throat and chest	Immunoassayed	630	26	<10	0.92	0.200688	[0.61, 1.37]	0.677792	0.746578	FALSE	FALSE
AAT	R10-R19	Symptoms and signs involving the digestive system and abdomen	Meta-analysis	12281	1007	791	1.11214	0.033033	[1.04, 1.19]	0.0012934	0.00506071	TRUE	FALSE
AAT	R10-R19	Symptoms and signs involving the digestive system and abdomen	FINRISK97	7512	636	253	1.07	0.0414	[0.99, 1.16]	0.0888738	0.203244	FALSE	FALSE
AAT	R10-R19	Symptoms and signs involving the digestive system and abdomen	DILGOM07	4769	371	538	1.19	0.0548	[1.07, 1.32]	0.00171445	0.0120959	TRUE	FALSE
AAT	R10-R19	Symptoms and signs involving the digestive system and abdomen	Training	615	54	<10	1.34	0.131519	[1.04, 1.73]	0.0260611	0.092216	FALSE	FALSE
AAT	R10-R19	Symptoms and signs involving the digestive system and abdomen	Immunoassayed	630	55	<10	1.09	0.147404	[0.82, 1.44]	0.558793	0.746578	FALSE	FALSE
AAT	R10	Abdominal and pelvic pain	Meta-analysis	12281	840	707	1.11038	0.0359709	[1.03, 1.19]	0.00360531	0.0118646	TRUE	FALSE
AAT	R10	Abdominal and pelvic pain	FINRISK97	7512	551	222	1.08	0.0445	[0.99, 1.18]	0.071944	0.188372	FALSE	FALSE
AAT	R10	Abdominal and pelvic pain	DILGOM07	4769	289	485	1.17	0.0611	[1.04, 1.32]	0.0111192	0.0419187	FALSE	FALSE
AAT	R10	Abdominal and pelvic pain	Training	615	44	<10	1.39	0.13806	[1.06, 1.83]	0.0170691	0.0872422	FALSE	FALSE
AAT	R10	Abdominal and pelvic pain	Immunoassayed	630	45	<10	1.09	0.162026	[0.80, 1.48]	0.594812	0.746578	FALSE	FALSE
AAT	R11	Nausea and vomiting	Meta-analysis	12281	59	23	1.6125	0.118341	[1.28, 2.03]	5.40545e-05	0.000433115	TRUE	FALSE
AAT	R11	Nausea and vomiting	FINRISK97	7512	33	10	1.53	0.1564	[1.13, 2.08]	0.00654446	0.0422266	FALSE	FALSE
AAT	R11	Nausea and vomiting	DILGOM07	4769	26	13	1.73	0.181	[1.22, 2.47]	0.00232986	0.0144808	TRUE	FALSE
AAT	R13	Dysphagia	Meta-analysis	12281	61	27	0.891449	0.143262	[0.67, 1.18]	0.422508	0.358818	FALSE	FALSE
AAT	R13	Dysphagia	FINRISK97	7512	31	3	0.9	0.1889	[0.62, 1.30]	0.579199	0.443039	FALSE	FALSE
AAT	R13	Dysphagia	DILGOM07	4769	30	24	0.88	0.2198	[0.57, 1.36]	0.564265	0.521133	FALSE	FALSE
AAT	R20-R23	Symptoms and signs involving the skin and subcutaneous tissue	Meta-analysis	12281	148	57	1.17	0.0854475	[0.99, 1.38]	0.0661466	0.106001	FALSE	FALSE
AAT	R20-R23	Symptoms and signs involving the skin and subcutaneous tissue	FINRISK97	7512	69	10	1.17	0.1217	[0.92, 1.49]	0.190292	0.28356	FALSE	FALSE
AAT	R20-R23	Symptoms and signs involving the skin and subcutaneous tissue	DILGOM07	4769	79	47	1.17	0.12	[0.92, 1.48]	0.19497	0.29891	FALSE	FALSE
AAT	R20	Disturbances of skin sensation	Meta-analysis	12281	61	24	1.26697	0.130672	[0.98, 1.64]	0.0701651	0.109582	FALSE	FALSE
AAT	R20	Disturbances of skin sensation	FINRISK97	7512	36	4	1.23	0.1658	[0.89, 1.71]	0.207927	0.302943	FALSE	FALSE
AAT	R20	Disturbances of skin sensation	DILGOM07	4769	25	20	1.33	0.2123	[0.88, 2.02]	0.177323	0.279304	FALSE	FALSE
AAT	R22	Localised swelling mass and lump of skin and subcutaneous tissue	Meta-analysis	12281	62	23	1.01619	0.140653	[0.77, 1.34]	0.909106	0.498626	FALSE	FALSE
AAT	R22	Localised swelling mass and lump of skin and subcutaneous tissue	FINRISK97	7512	27	5	1.08	0.2024	[0.73, 1.60]	0.70857	0.465501	FALSE	FALSE
AAT	R22	Localised swelling mass and lump of skin and subcutaneous tissue	DILGOM07	4769	35	18	0.96	0.1956	[0.65, 1.41]	0.835101	0.611502	FALSE	FALSE
AAT	R25-R29	Symptoms and signs involving the nervous and musculoskeletal systems	Meta-analysis	12281	139	104	1.10006	0.0892854	[0.92, 1.31]	0.285493	0.287503	FALSE	FALSE
AAT	R25-R29	Symptoms and signs involving the nervous and musculoskeletal systems	FINRISK97	7512	77	35	1.05	0.1183	[0.84, 1.33]	0.656417	0.452636	FALSE	FALSE
AAT	R25-R29	Symptoms and signs involving the nervous and musculoskeletal systems	DILGOM07	4769	62	69	1.17	0.1361	[0.89, 1.52]	0.261293	0.355554	FALSE	FALSE
AAT	R29	Other symptoms and signs involving the nervous and musculoskeletal systems	Meta-analysis	12281	74	87	1.07212	0.123007	[0.84, 1.36]	0.571324	0.416161	FALSE	FALSE
AAT	R29	Other symptoms and signs involving the nervous and musculoskeletal systems	FINRISK97	7512	52	33	1.08	0.143	[0.81, 1.43]	0.602426	0.446463	FALSE	FALSE
AAT	R29	Other symptoms and signs involving the nervous and musculoskeletal systems	DILGOM07	4769	22	54	1.05	0.2412	[0.65, 1.68]	0.84825	0.611502	FALSE	FALSE
AAT	R30-R39	Symptoms and signs involving the urinary system	Meta-analysis	12281	293	124	1.27	0.0567659	[1.14, 1.42]	2.54721e-05	0.000228644	TRUE	FALSE
AAT	R30-R39	Symptoms and signs involving the urinary system	FINRISK97	7512	147	20	1.27	0.0784	[1.09, 1.48]	0.00254942	0.0191912	FALSE	FALSE
AAT	R30-R39	Symptoms and signs involving the urinary system	DILGOM07	4769	146	104	1.27	0.0823	[1.08, 1.49]	0.00362699	0.0188848	FALSE	FALSE
AAT	R31	Unspecified haematuria	Meta-analysis	12281	119	53	1.31729	0.0883717	[1.11, 1.57]	0.00181832	0.00683871	TRUE	FALSE
AAT	R31	Unspecified haematuria	FINRISK97	7512	56	7	1.38	0.1264	[1.08, 1.77]	0.0111529	0.0646693	FALSE	FALSE
AAT	R31	Unspecified haematuria	DILGOM07	4769	63	46	1.26	0.1236	[0.99, 1.61]	0.0575551	0.139323	FALSE	FALSE
AAT	R33	Retention of urine	Meta-analysis	12281	97	26	1.50629	0.0887626	[1.27, 1.79]	3.92879e-06	4.0224e-05	TRUE	FALSE
AAT	R33	Retention of urine	FINRISK97	7512	44	7	1.32	0.1389	[1.01, 1.74]	0.0432649	0.162841	FALSE	FALSE
AAT	R33	Retention of urine	DILGOM07	4769	53	19	1.65	0.1154	[1.32, 2.07]	1.44172e-05	0.000414434	TRUE	FALSE
AAT	R35	Polyuria	Meta-analysis	12281	54	25	1.00826	0.143298	[0.76, 1.34]	0.954239	0.512699	FALSE	FALSE
AAT	R35	Polyuria	FINRISK97	7512	27	4	1.11	0.1872	[0.77, 1.60]	0.576661	0.443039	FALSE	FALSE
AAT	R35	Polyuria	DILGOM07	4769	27	21	0.88	0.2227	[0.57, 1.36]	0.560909	0.521133	FALSE	FALSE
AAT	R40-R46	Symptoms and signs involving cognition perception emotional state and behaviour	Meta-analysis	12281	495	240	1.08366	0.0471888	[0.99, 1.19]	0.0886499	0.128639	FALSE	FALSE
AAT	R40-R46	Symptoms and signs involving cognition perception emotional state and behaviour	FINRISK97	7512	308	75	1.01	0.0604	[0.90, 1.14]	0.873838	0.481991	FALSE	FALSE
AAT	R40-R46	Symptoms and signs involving cognition perception emotional state and behaviour	DILGOM07	4769	187	165	1.21	0.0756	[1.04, 1.40]	0.0115569	0.0428659	FALSE	FALSE
AAT	R41	Other symptoms and signs involving cognitive functions and awareness	Meta-analysis	12281	145	30	1.17666	0.0832575	[1.00, 1.39]	0.050714	0.0857434	FALSE	FALSE
AAT	R41	Other symptoms and signs involving cognitive functions and awareness	FINRISK97	7512	74	0	1.12	0.1122	[0.90, 1.40]	0.303511	0.340562	FALSE	FALSE
AAT	R41	Other symptoms and signs involving cognitive functions and awareness	DILGOM07	4769	71	30	1.25	0.1242	[0.98, 1.59]	0.0774048	0.167929	FALSE	FALSE
AAT	R42	Dizziness and giddiness	Meta-analysis	12281	340	204	1.04237	0.0578867	[0.93, 1.17]	0.473433	0.376843	FALSE	FALSE
AAT	R42	Dizziness and giddiness	FINRISK97	7512	227	72	0.98	0.0717	[0.85, 1.13]	0.753668	0.469708	FALSE	FALSE
AAT	R42	Dizziness and giddiness	DILGOM07	4769	113	132	1.17	0.0981	[0.96, 1.42]	0.112111	0.214331	FALSE	FALSE
AAT	R47-R49	Symptoms and signs involving speech and voice	Meta-analysis	12281	91	39	1.28432	0.105191	[1.05, 1.58]	0.0173692	0.0438486	FALSE	FALSE
AAT	R47-R49	Symptoms and signs involving speech and voice	FINRISK97	7512	54	0	1.3	0.1345	[1.00, 1.69]	0.0540817	0.166553	FALSE	FALSE
AAT	R47-R49	Symptoms and signs involving speech and voice	DILGOM07	4769	37	39	1.26	0.1688	[0.91, 1.76]	0.168778	0.269536	FALSE	FALSE
AAT	R49	Voice disturbances	Meta-analysis	12281	79	34	1.29395	0.112574	[1.04, 1.61]	0.0220687	0.0495979	FALSE	FALSE
AAT	R49	Voice disturbances	FINRISK97	7512	47	0	1.29	0.1449	[0.97, 1.72]	0.0772646	0.188572	FALSE	FALSE
AAT	R49	Voice disturbances	DILGOM07	4769	32	34	1.3	0.1788	[0.91, 1.84]	0.147865	0.253761	FALSE	FALSE
AAT	R50-R69	General symptoms and signs	Meta-analysis	12281	715	404	1.08269	0.03877	[1.00, 1.17]	0.0404504	0.077869	FALSE	FALSE
AAT	R50-R69	General symptoms and signs	FINRISK97	7512	388	105	1.11	0.0522	[1.00, 1.22]	0.0543918	0.166553	FALSE	FALSE
AAT	R50-R69	General symptoms and signs	DILGOM07	4769	327	299	1.05	0.0579	[0.94, 1.17]	0.414696	0.451972	FALSE	FALSE
AAT	R50-R69	General symptoms and signs	Training	615	40	<10	0.83	0.184856	[0.59, 1.19]	0.313469	0.514985	FALSE	FALSE
AAT	R50-R69	General symptoms and signs	Immunoassayed	630	41	<10	1.22	0.167781	[0.88, 1.71]	0.235946	0.500328	FALSE	FALSE
AAT	R50	Fever of unknown origin	Meta-analysis	12281	135	85	1.33185	0.0838942	[1.13, 1.57]	0.000635948	0.0026636	TRUE	FALSE
AAT	R50	Fever of unknown origin	FINRISK97	7512	79	23	1.53	0.1022	[1.25, 1.87]	3.20306e-05	0.000468508	TRUE	FALSE
AAT	R50	Fever of unknown origin	DILGOM07	4769	56	62	1	0.1469	[0.75, 1.33]	0.995741	0.654249	FALSE	FALSE
AAT	R51	Headache	Meta-analysis	12281	192	85	0.982226	0.075734	[0.85, 1.14]	0.812815	0.476308	FALSE	FALSE
AAT	R51	Headache	FINRISK97	7512	112	3	0.97	0.0987	[0.80, 1.18]	0.757846	0.469708	FALSE	FALSE
AAT	R51	Headache	DILGOM07	4769	80	82	1	0.1181	[0.80, 1.27]	0.970359	0.648384	FALSE	FALSE
AAT	R53	Malaise and fatigue	Meta-analysis	12281	66	24	1.09231	0.12598	[0.85, 1.40]	0.483399	0.380705	FALSE	FALSE
AAT	R53	Malaise and fatigue	FINRISK97	7512	32	9	1.01	0.1843	[0.70, 1.45]	0.959357	0.501901	FALSE	FALSE
AAT	R53	Malaise and fatigue	DILGOM07	4769	34	15	1.17	0.1726	[0.83, 1.64]	0.361401	0.419499	FALSE	FALSE
AAT	R55	Syncope and collapse	Meta-analysis	12281	142	89	0.965157	0.0918051	[0.81, 1.16]	0.699277	0.45833	FALSE	FALSE
AAT	R55	Syncope and collapse	FINRISK97	7512	68	29	0.94	0.1311	[0.72, 1.21]	0.609584	0.446463	FALSE	FALSE
AAT	R55	Syncope and collapse	DILGOM07	4769	74	60	0.99	0.1286	[0.77, 1.28]	0.950366	0.644697	FALSE	FALSE
AAT	R56	Convulsions not elsewhere classified	Meta-analysis	12281	79	56	1.15371	0.115048	[0.92, 1.45]	0.213948	0.238959	FALSE	FALSE
AAT	R56	Convulsions not elsewhere classified	FINRISK97	7512	50	22	0.9	0.1569	[0.66, 1.23]	0.514419	0.423732	FALSE	FALSE
AAT	R56	Convulsions not elsewhere classified	DILGOM07	4769	29	34	1.54	0.1692	[1.11, 2.15]	0.0102764	0.0401186	FALSE	FALSE
AAT	R70-R79	Abnormal findings on examination of blood without diagnosis	Meta-analysis	12281	110	48	1.20202	0.0917427	[1.00, 1.44]	0.0448973	0.0809948	FALSE	FALSE
AAT	R70-R79	Abnormal findings on examination of blood without diagnosis	FINRISK97	7512	53	10	0.87	0.1497	[0.65, 1.16]	0.334133	0.354413	FALSE	FALSE
AAT	R70-R79	Abnormal findings on examination of blood without diagnosis	DILGOM07	4769	57	38	1.46	0.1161	[1.16, 1.84]	0.00108328	0.00889707	TRUE	FALSE
AAT	R74	Abnormal serum enzyme levels	Meta-analysis	12281	68	22	1.07845	0.123622	[0.85, 1.37]	0.541222	0.398965	FALSE	FALSE
AAT	R74	Abnormal serum enzyme levels	FINRISK97	7512	28	2	0.9	0.2029	[0.60, 1.33]	0.586225	0.443039	FALSE	FALSE
AAT	R74	Abnormal serum enzyme levels	DILGOM07	4769	40	20	1.2	0.1559	[0.89, 1.63]	0.236441	0.33659	FALSE	FALSE
AAT	R83-R89	Abnormal findings on examination of other body fluids substances and tissues without diagnosis	Meta-analysis	12281	156	109	1.01228	0.0843436	[0.86, 1.19]	0.884985	0.49379	FALSE	FALSE
AAT	R83-R89	Abnormal findings on examination of other body fluids substances and tissues without diagnosis	FINRISK97	7512	100	6	0.93	0.1062	[0.75, 1.14]	0.492527	0.423658	FALSE	FALSE
AAT	R83-R89	Abnormal findings on examination of other body fluids substances and tissues without diagnosis	DILGOM07	4769	56	103	1.17	0.1388	[0.89, 1.54]	0.248659	0.341975	FALSE	FALSE
AAT	R87	Abnormal findings in specimens from female genital organs	Meta-analysis	12281	145	104	0.992411	0.0871947	[0.84, 1.18]	0.930384	0.502814	FALSE	FALSE
AAT	R87	Abnormal findings in specimens from female genital organs	FINRISK97	7512	90	6	0.9	0.1112	[0.72, 1.12]	0.341793	0.356933	FALSE	FALSE
AAT	R87	Abnormal findings in specimens from female genital organs	DILGOM07	4769	55	98	1.16	0.1405	[0.88, 1.53]	0.291014	0.378098	FALSE	FALSE
AAT	R90-R94	Abnormal findings on diagnostic imaging and in function studies without diagnosis	Meta-analysis	12281	153	56	1.32897	0.0768167	[1.14, 1.54]	0.00021363	0.00109983	TRUE	FALSE
AAT	R90-R94	Abnormal findings on diagnostic imaging and in function studies without diagnosis	FINRISK97	7512	83	18	1.19	0.1049	[0.97, 1.46]	0.0974359	0.207651	FALSE	FALSE
AAT	R90-R94	Abnormal findings on diagnostic imaging and in function studies without diagnosis	DILGOM07	4769	70	38	1.51	0.1128	[1.21, 1.88]	0.000270945	0.00311541	TRUE	FALSE
AAT	R91	Abnormal findings on diagnostic imaging of lung	Meta-analysis	12281	119	27	1.36046	0.0874853	[1.15, 1.61]	0.000433888	0.00195026	TRUE	FALSE
AAT	R91	Abnormal findings on diagnostic imaging of lung	FINRISK97	7512	66	10	1.19	0.1182	[0.95, 1.50]	0.136204	0.229466	FALSE	FALSE
AAT	R91	Abnormal findings on diagnostic imaging of lung	DILGOM07	4769	53	17	1.6	0.1301	[1.24, 2.06]	0.000316975	0.00344679	TRUE	FALSE
AAT	S00-S09	Injuries to the head	Meta-analysis	12281	416	322	1.09052	0.0518744	[0.99, 1.21]	0.0948213	0.133393	FALSE	FALSE
AAT	S00-S09	Injuries to the head	FINRISK97	7512	253	110	1.11	0.0661	[0.97, 1.26]	0.125508	0.222302	FALSE	FALSE
AAT	S00-S09	Injuries to the head	DILGOM07	4769	163	212	1.06	0.0837	[0.90, 1.25]	0.462435	0.479029	FALSE	FALSE
AAT	S01	Open wound of head	Meta-analysis	12281	143	88	1.07958	0.0895741	[0.91, 1.29]	0.392618	0.343241	FALSE	FALSE
AAT	S01	Open wound of head	FINRISK97	7512	92	25	1.02	0.1127	[0.82, 1.27]	0.868728	0.481991	FALSE	FALSE
AAT	S01	Open wound of head	DILGOM07	4769	51	63	1.19	0.1476	[0.89, 1.59]	0.239164	0.337421	FALSE	FALSE
AAT	S02	Fracture of skull and facial bones	Meta-analysis	12281	70	62	0.975478	0.129706	[0.76, 1.26]	0.848203	0.47971	FALSE	FALSE
AAT	S02	Fracture of skull and facial bones	FINRISK97	7512	45	28	1.05	0.1565	[0.77, 1.43]	0.747305	0.469708	FALSE	FALSE
AAT	S02	Fracture of skull and facial bones	DILGOM07	4769	25	34	0.83	0.2318	[0.53, 1.31]	0.420579	0.455618	FALSE	FALSE
AAT	S06	Intracranial injury	Meta-analysis	12281	166	127	1.16226	0.0801973	[0.99, 1.36]	0.060801	0.098289	FALSE	FALSE
AAT	S06	Intracranial injury	FINRISK97	7512	91	52	1.18	0.1071	[0.96, 1.46]	0.114222	0.218924	FALSE	FALSE
AAT	S06	Intracranial injury	DILGOM07	4769	75	75	1.14	0.121	[0.90, 1.44]	0.290212	0.378098	FALSE	FALSE
AAT	S10-S19	Injuries to the neck	Meta-analysis	12281	62	43	1.13317	0.133427	[0.87, 1.47]	0.34876	0.322978	FALSE	FALSE
AAT	S10-S19	Injuries to the neck	FINRISK97	7512	38	12	1.19	0.1672	[0.86, 1.65]	0.30356	0.340562	FALSE	FALSE
AAT	S10-S19	Injuries to the neck	DILGOM07	4769	24	31	1.04	0.2214	[0.68, 1.61]	0.847388	0.611502	FALSE	FALSE
AAT	S20-S29	Injuries to the thorax	Meta-analysis	12281	124	87	1.1328	0.0922422	[0.95, 1.36]	0.176443	0.215341	FALSE	FALSE
AAT	S20-S29	Injuries to the thorax	FINRISK97	7512	79	38	1.09	0.1161	[0.87, 1.37]	0.46257	0.407657	FALSE	FALSE
AAT	S20-S29	Injuries to the thorax	DILGOM07	4769	45	49	1.21	0.1519	[0.90, 1.63]	0.214437	0.316111	FALSE	FALSE
AAT	S22	Fracture of ribs sternum and thoracic spine	Meta-analysis	12281	78	46	1.21689	0.114751	[0.97, 1.52]	0.0871514	0.127469	FALSE	FALSE
AAT	S22	Fracture of ribs sternum and thoracic spine	FINRISK97	7512	48	23	1.15	0.1494	[0.86, 1.54]	0.352657	0.360683	FALSE	FALSE
AAT	S22	Fracture of ribs sternum and thoracic spine	DILGOM07	4769	30	23	1.32	0.1792	[0.93, 1.87]	0.124027	0.230017	FALSE	FALSE
AAT	S30-S39	Injuries to the abdomen lower back lumbar spine and pelvis	Meta-analysis	12281	86	87	1.10775	0.109652	[0.89, 1.37]	0.350691	0.323143	FALSE	FALSE
AAT	S30-S39	Injuries to the abdomen lower back lumbar spine and pelvis	FINRISK97	7512	58	33	1.09	0.1312	[0.84, 1.41]	0.518406	0.423732	FALSE	FALSE
AAT	S30-S39	Injuries to the abdomen lower back lumbar spine and pelvis	DILGOM07	4769	28	54	1.15	0.1997	[0.78, 1.70]	0.48966	0.485368	FALSE	FALSE
AAT	S40-S49	Injuries to the shoulder and upper arm	Meta-analysis	12281	309	215	1.03114	0.0620728	[0.91, 1.16]	0.621291	0.435944	FALSE	FALSE
AAT	S40-S49	Injuries to the shoulder and upper arm	FINRISK97	7512	182	62	1.02	0.0785	[0.88, 1.19]	0.794278	0.469708	FALSE	FALSE
AAT	S40-S49	Injuries to the shoulder and upper arm	DILGOM07	4769	127	153	1.05	0.1014	[0.86, 1.28]	0.642254	0.558116	FALSE	FALSE
AAT	S42	Fracture of shoulder and upper arm	Meta-analysis	12281	88	73	1.14298	0.112695	[0.92, 1.43]	0.235692	0.253342	FALSE	FALSE
AAT	S42	Fracture of shoulder and upper arm	FINRISK97	7512	49	21	1.04	0.1466	[0.78, 1.39]	0.777107	0.469708	FALSE	FALSE
AAT	S42	Fracture of shoulder and upper arm	DILGOM07	4769	39	52	1.31	0.1762	[0.92, 1.84]	0.129996	0.233515	FALSE	FALSE
AAT	S43	Dislocation sprain and strain of joints and ligaments of shoulder girdle	Meta-analysis	12281	87	89	1.11113	0.118281	[0.88, 1.40]	0.372991	0.336952	FALSE	FALSE
AAT	S43	Dislocation sprain and strain of joints and ligaments of shoulder girdle	FINRISK97	7512	52	34	1.1	0.1495	[0.82, 1.47]	0.529249	0.42496	FALSE	FALSE
AAT	S43	Dislocation sprain and strain of joints and ligaments of shoulder girdle	DILGOM07	4769	35	55	1.13	0.1934	[0.77, 1.65]	0.521152	0.501454	FALSE	FALSE
AAT	S46	Injury of muscle and tendon at shoulder and upper arm level	Meta-analysis	12281	130	50	0.956623	0.0975424	[0.79, 1.16]	0.649372	0.440852	FALSE	FALSE
AAT	S46	Injury of muscle and tendon at shoulder and upper arm level	FINRISK97	7512	74	3	1.01	0.1223	[0.79, 1.28]	0.938648	0.497021	FALSE	FALSE
AAT	S46	Injury of muscle and tendon at shoulder and upper arm level	DILGOM07	4769	56	47	0.87	0.1617	[0.63, 1.19]	0.3857	0.434795	FALSE	FALSE
AAT	S50-S59	Injuries to the elbow and forearm	Meta-analysis	12281	238	157	0.926787	0.071966	[0.80, 1.07]	0.290744	0.289627	FALSE	FALSE
AAT	S50-S59	Injuries to the elbow and forearm	FINRISK97	7512	132	38	0.91	0.0949	[0.75, 1.09]	0.312876	0.346048	FALSE	FALSE
AAT	S50-S59	Injuries to the elbow and forearm	DILGOM07	4769	106	119	0.95	0.1104	[0.76, 1.18]	0.626251	0.549682	FALSE	FALSE
AAT	S52	Fracture of forearm	Meta-analysis	12281	192	120	0.921588	0.0795864	[0.79, 1.08]	0.30488	0.298862	FALSE	FALSE
AAT	S52	Fracture of forearm	FINRISK97	7512	103	23	0.9	0.1062	[0.73, 1.11]	0.335456	0.354413	FALSE	FALSE
AAT	S52	Fracture of forearm	DILGOM07	4769	89	97	0.95	0.1202	[0.75, 1.21]	0.683786	0.573575	FALSE	FALSE
AAT	S60-S69	Injuries to the wrist and hand	Meta-analysis	12281	294	255	0.938423	0.064775	[0.83, 1.07]	0.326516	0.310172	FALSE	FALSE
AAT	S60-S69	Injuries to the wrist and hand	FINRISK97	7512	175	67	1.09	0.0803	[0.93, 1.28]	0.285152	0.338366	FALSE	FALSE
AAT	S60-S69	Injuries to the wrist and hand	DILGOM07	4769	119	188	0.71	0.1096	[0.57, 0.88]	0.00173575	0.0120959	TRUE	FALSE
AAT	S61	Open wound of wrist and hand	Meta-analysis	12281	104	91	1.02821	0.104817	[0.84, 1.26]	0.790706	0.474241	FALSE	FALSE
AAT	S61	Open wound of wrist and hand	FINRISK97	7512	64	31	1.14	0.1276	[0.88, 1.46]	0.319276	0.346135	FALSE	FALSE
AAT	S61	Open wound of wrist and hand	DILGOM07	4769	40	60	0.83	0.1838	[0.58, 1.19]	0.30524	0.389972	FALSE	FALSE
AAT	S62	Fracture at wrist and hand level	Meta-analysis	12281	98	70	0.987034	0.111758	[0.79, 1.23]	0.907037	0.498626	FALSE	FALSE
AAT	S62	Fracture at wrist and hand level	FINRISK97	7512	56	13	1.1	0.1445	[0.83, 1.46]	0.519319	0.423732	FALSE	FALSE
AAT	S62	Fracture at wrist and hand level	DILGOM07	4769	42	57	0.84	0.1763	[0.59, 1.18]	0.307041	0.390105	FALSE	FALSE
AAT	S63	Dislocation sprain and strain of joints and ligaments at wrist and hand level	Meta-analysis	12281	55	48	0.685638	0.162626	[0.50, 0.94]	0.0203036	0.0483573	FALSE	FALSE
AAT	S63	Dislocation sprain and strain of joints and ligaments at wrist and hand level	FINRISK97	7512	31	12	0.9	0.2028	[0.60, 1.34]	0.596625	0.445407	FALSE	FALSE
AAT	S63	Dislocation sprain and strain of joints and ligaments at wrist and hand level	DILGOM07	4769	24	36	0.42	0.2722	[0.25, 0.72]	0.00160217	0.0120959	TRUE	FALSE
AAT	S70-S79	Injuries to the hip and thigh	Meta-analysis	12281	107	76	1.1146	0.0978544	[0.92, 1.35]	0.267539	0.275444	FALSE	FALSE
AAT	S70-S79	Injuries to the hip and thigh	FINRISK97	7512	59	25	1.08	0.1257	[0.84, 1.38]	0.549543	0.435225	FALSE	FALSE
AAT	S70-S79	Injuries to the hip and thigh	DILGOM07	4769	48	51	1.17	0.1559	[0.86, 1.59]	0.310171	0.391917	FALSE	FALSE
AAT	S72	Fracture of femur	Meta-analysis	12281	57	48	1.30266	0.122225	[1.03, 1.66]	0.0305176	0.0631916	FALSE	FALSE
AAT	S72	Fracture of femur	FINRISK97	7512	33	18	1.22	0.1518	[0.91, 1.64]	0.191485	0.28356	FALSE	FALSE
AAT	S72	Fracture of femur	DILGOM07	4769	24	30	1.47	0.2061	[0.98, 2.20]	0.0624891	0.148148	FALSE	FALSE
AAT	S80-S89	Injuries to the knee and lower leg	Meta-analysis	12281	518	570	1.0218	0.0476143	[0.93, 1.12]	0.650673	0.440852	FALSE	FALSE
AAT	S80-S89	Injuries to the knee and lower leg	FINRISK97	7512	309	205	1.01	0.0613	[0.90, 1.14]	0.845429	0.476846	FALSE	FALSE
AAT	S80-S89	Injuries to the knee and lower leg	DILGOM07	4769	209	365	1.04	0.0756	[0.90, 1.21]	0.588578	0.534992	FALSE	FALSE
AAT	S80-S89	Injuries to the knee and lower leg	Training	615	30	<10	1.2	0.189896	[0.83, 1.74]	0.336998	0.523061	FALSE	FALSE
AAT	S80-S89	Injuries to the knee and lower leg	Immunoassayed	630	30	<10	1.48	0.201564	[1.00, 2.20]	0.0517746	0.247026	FALSE	FALSE
AAT	S82	Fracture of lower leg including ankle	Meta-analysis	12281	210	248	1.1378	0.0709992	[0.99, 1.31]	0.0690122	0.108702	FALSE	FALSE
AAT	S82	Fracture of lower leg including ankle	FINRISK97	7512	137	107	1.02	0.0909	[0.85, 1.21]	0.85901	0.481962	FALSE	FALSE
AAT	S82	Fracture of lower leg including ankle	DILGOM07	4769	73	141	1.35	0.1137	[1.08, 1.68]	0.00857691	0.0346035	FALSE	FALSE
AAT	S83	Dislocation sprain and strain of joints and ligaments of knee	Meta-analysis	12281	228	275	0.964264	0.0746004	[0.83, 1.12]	0.625689	0.436056	FALSE	FALSE
AAT	S83	Dislocation sprain and strain of joints and ligaments of knee	FINRISK97	7512	128	84	1.02	0.0973	[0.85, 1.24]	0.812458	0.473489	FALSE	FALSE
AAT	S83	Dislocation sprain and strain of joints and ligaments of knee	DILGOM07	4769	100	191	0.89	0.1162	[0.71, 1.12]	0.31584	0.396899	FALSE	FALSE
AAT	S90-S99	Injuries to the ankle and foot	Meta-analysis	12281	151	171	1.04418	0.086643	[0.88, 1.24]	0.617784	0.435944	FALSE	FALSE
AAT	S90-S99	Injuries to the ankle and foot	FINRISK97	7512	96	60	1.09	0.1065	[0.89, 1.35]	0.403391	0.371827	FALSE	FALSE
AAT	S90-S99	Injuries to the ankle and foot	DILGOM07	4769	55	111	0.96	0.149	[0.72, 1.29]	0.797	0.594032	FALSE	FALSE
AAT	S93	Dislocation sprain and strain of joints and ligaments at ankle and foot level	Meta-analysis	12281	72	115	1.06	0.126878	[0.83, 1.36]	0.646053	0.440852	FALSE	FALSE
AAT	S93	Dislocation sprain and strain of joints and ligaments at ankle and foot level	FINRISK97	7512	46	43	1.06	0.1594	[0.78, 1.45]	0.70051	0.465501	FALSE	FALSE
AAT	S93	Dislocation sprain and strain of joints and ligaments at ankle and foot level	DILGOM07	4769	26	72	1.06	0.2096	[0.70, 1.59]	0.798186	0.594032	FALSE	FALSE
AAT	T15-T19	Effects of foreign body entering through natural orifice	Meta-analysis	12281	79	46	0.861097	0.128512	[0.67, 1.11]	0.24455	0.25753	FALSE	FALSE
AAT	T15-T19	Effects of foreign body entering through natural orifice	FINRISK97	7512	52	13	0.83	0.1603	[0.60, 1.13]	0.23293	0.316115	FALSE	FALSE
AAT	T15-T19	Effects of foreign body entering through natural orifice	DILGOM07	4769	27	33	0.92	0.215	[0.61, 1.41]	0.715338	0.577018	FALSE	FALSE
AAT	T80-T88	Complications of surgical and medical care not elsewhere classified	Meta-analysis	12281	305	186	1.25533	0.0579303	[1.12, 1.41]	8.65858e-05	0.000590992	TRUE	FALSE
AAT	T80-T88	Complications of surgical and medical care not elsewhere classified	FINRISK97	7512	146	65	1.24	0.0831	[1.05, 1.46]	0.00923053	0.0575042	FALSE	FALSE
AAT	T80-T88	Complications of surgical and medical care not elsewhere classified	DILGOM07	4769	159	121	1.27	0.0808	[1.08, 1.49]	0.00298096	0.017138	FALSE	FALSE
AAT	T81	Complications of procedures not elsewhere classified	Meta-analysis	12281	233	159	1.24144	0.0665499	[1.09, 1.41]	0.00115489	0.00462683	TRUE	FALSE
AAT	T81	Complications of procedures not elsewhere classified	FINRISK97	7512	112	56	1.17	0.0965	[0.97, 1.41]	0.104835	0.212808	FALSE	FALSE
AAT	T81	Complications of procedures not elsewhere classified	DILGOM07	4769	121	103	1.31	0.0919	[1.09, 1.57]	0.0032698	0.0179266	FALSE	FALSE
AAT	T84	Complications of internal orthopaedic prosthetic devices implants and grafts	Meta-analysis	12281	59	21	1.28652	0.133254	[0.99, 1.67]	0.058664	0.0965279	FALSE	FALSE
AAT	T84	Complications of internal orthopaedic prosthetic devices implants and grafts	FINRISK97	7512	24	4	1.38	0.1888	[0.95, 2.00]	0.0863768	0.200066	FALSE	FALSE
AAT	T84	Complications of internal orthopaedic prosthetic devices implants and grafts	DILGOM07	4769	35	17	1.2	0.1881	[0.83, 1.73]	0.342572	0.412461	FALSE	FALSE
AAT	T90-T98	Sequelae of injuries of poisoning and of other consequences of external causes	Meta-analysis	12281	65	142	1.3412	0.121988	[1.06, 1.70]	0.0161057	0.0412237	FALSE	FALSE
AAT	T90-T98	Sequelae of injuries of poisoning and of other consequences of external causes	FINRISK97	7512	42	81	1.41	0.1508	[1.05, 1.90]	0.022512	0.101677	FALSE	FALSE
AAT	T90-T98	Sequelae of injuries of poisoning and of other consequences of external causes	DILGOM07	4769	23	61	1.22	0.2075	[0.82, 1.84]	0.32889	0.40262	FALSE	FALSE
AAT	Z00-Z13	Persons encountering health services for examination and investigation	Meta-analysis	12281	1964	963	1.08142	0.0239396	[1.03, 1.13]	0.00107701	0.00441067	TRUE	FALSE
AAT	Z00-Z13	Persons encountering health services for examination and investigation	FINRISK97	7512	1036	106	1.04	0.0329	[0.97, 1.10]	0.291455	0.338366	FALSE	FALSE
AAT	Z00-Z13	Persons encountering health services for examination and investigation	DILGOM07	4769	928	857	1.13	0.0349	[1.06, 1.21]	0.000335113	0.00344679	TRUE	FALSE
AAT	Z00-Z13	Persons encountering health services for examination and investigation	Training	615	64	<10	1.56	0.120705	[1.23, 1.97]	0.000229525	0.00527908	TRUE	FALSE
AAT	Z00-Z13	Persons encountering health services for examination and investigation	Immunoassayed	630	64	<10	1.41	0.137844	[1.08, 1.85]	0.0126815	0.161348	FALSE	FALSE
AAT	Z00	General examination and investigation of persons without complaint or reported diagnosis	Meta-analysis	12281	298	285	1.08588	0.0600771	[0.97, 1.22]	0.170232	0.209146	FALSE	FALSE
AAT	Z00	General examination and investigation of persons without complaint or reported diagnosis	FINRISK97	7512	150	103	1.1	0.0823	[0.94, 1.29]	0.248337	0.319691	FALSE	FALSE
AAT	Z00	General examination and investigation of persons without complaint or reported diagnosis	DILGOM07	4769	148	182	1.07	0.0879	[0.90, 1.27]	0.422004	0.455618	FALSE	FALSE
AAT	Z01	Other special examinations and investigations of persons without complaint or reported diagnosis	Meta-analysis	12281	966	397	1.06143	0.0341425	[0.99, 1.13]	0.0807704	0.120041	FALSE	FALSE
AAT	Z01	Other special examinations and investigations of persons without complaint or reported diagnosis	FINRISK97	7512	536	2	1.04	0.0454	[0.95, 1.14]	0.399552	0.371649	FALSE	FALSE
AAT	Z01	Other special examinations and investigations of persons without complaint or reported diagnosis	DILGOM07	4769	430	395	1.09	0.0518	[0.99, 1.21]	0.0888478	0.182527	FALSE	FALSE
AAT	Z03	Medical observation and evaluation for suspected diseases and conditions	Meta-analysis	12281	480	167	1.15212	0.046734	[1.05, 1.26]	0.00244523	0.00883584	TRUE	FALSE
AAT	Z03	Medical observation and evaluation for suspected diseases and conditions	FINRISK97	7512	247	0	1.05	0.0667	[0.92, 1.20]	0.450673	0.401085	FALSE	FALSE
AAT	Z03	Medical observation and evaluation for suspected diseases and conditions	DILGOM07	4769	233	167	1.26	0.0655	[1.11, 1.43]	0.000435624	0.00400715	TRUE	FALSE
AAT	Z04	Examination and observation for other reasons	Meta-analysis	12281	192	79	1.06356	0.0764182	[0.92, 1.24]	0.420004	0.358343	FALSE	FALSE
AAT	Z04	Examination and observation for other reasons	FINRISK97	7512	65	1	0.94	0.1332	[0.72, 1.22]	0.637788	0.446463	FALSE	FALSE
AAT	Z04	Examination and observation for other reasons	DILGOM07	4769	127	78	1.13	0.0933	[0.94, 1.36]	0.1821	0.282951	FALSE	FALSE
AAT	Z09	Follow up examination after treatment for conditions other than malignant neoplasms	Meta-analysis	12281	171	117	1.10479	0.0807004	[0.94, 1.29]	0.216869	0.23932	FALSE	FALSE
AAT	Z09	Follow up examination after treatment for conditions other than malignant neoplasms	FINRISK97	7512	95	0	1.14	0.107	[0.92, 1.40]	0.233624	0.316115	FALSE	FALSE
AAT	Z09	Follow up examination after treatment for conditions other than malignant neoplasms	DILGOM07	4769	76	117	1.06	0.1229	[0.83, 1.35]	0.643141	0.558116	FALSE	FALSE
AAT	Z11	Special screening examination for infectious and parasitic diseases	Meta-analysis	12281	88	68	1.15933	0.113076	[0.93, 1.45]	0.19105	0.227151	FALSE	FALSE
AAT	Z11	Special screening examination for infectious and parasitic diseases	FINRISK97	7512	39	0	0.99	0.1712	[0.71, 1.39]	0.972651	0.504199	FALSE	FALSE
AAT	Z11	Special screening examination for infectious and parasitic diseases	DILGOM07	4769	49	68	1.31	0.1506	[0.98, 1.76]	0.0721688	0.16578	FALSE	FALSE
AAT	Z30-Z39	Persons encountering health services in circumstances related to reproduction	Meta-analysis	12281	663	946	0.992702	0.0389068	[0.92, 1.07]	0.850665	0.47971	FALSE	FALSE
AAT	Z30-Z39	Persons encountering health services in circumstances related to reproduction	FINRISK97	7512	448	371	1.01	0.0479	[0.92, 1.11]	0.833658	0.476704	FALSE	FALSE
AAT	Z30-Z39	Persons encountering health services in circumstances related to reproduction	DILGOM07	4769	215	575	0.96	0.0667	[0.85, 1.10]	0.574391	0.527205	FALSE	FALSE
AAT	Z30-Z39	Persons encountering health services in circumstances related to reproduction	Training	615	33	<10	0.81	0.185521	[0.57, 1.16]	0.256026	0.436192	FALSE	FALSE
AAT	Z30-Z39	Persons encountering health services in circumstances related to reproduction	Immunoassayed	630	33	<10	1.02	0.153892	[0.77, 1.35]	0.897612	0.813598	FALSE	FALSE
AAT	Z30	Contraceptive management	Meta-analysis	12281	260	656	0.985184	0.0654448	[0.87, 1.12]	0.819584	0.476467	FALSE	FALSE
AAT	Z30	Contraceptive management	FINRISK97	7512	202	328	1.01	0.0739	[0.87, 1.17]	0.899819	0.48672	FALSE	FALSE
AAT	Z30	Contraceptive management	DILGOM07	4769	58	328	0.9	0.1409	[0.68, 1.18]	0.433643	0.459554	FALSE	FALSE
AAT	Z32	Pregnancy examination and test	Meta-analysis	12281	49	27	0.872728	0.136219	[0.67, 1.14]	0.317622	0.304866	FALSE	FALSE
AAT	Z32	Pregnancy examination and test	FINRISK97	7512	24	0	0.82	0.1917	[0.56, 1.20]	0.302971	0.340562	FALSE	FALSE
AAT	Z32	Pregnancy examination and test	DILGOM07	4769	25	27	0.93	0.1936	[0.64, 1.36]	0.705895	0.577018	FALSE	FALSE
AAT	Z34	Supervision of normal pregnancy	Meta-analysis	12281	216	196	0.952097	0.0663306	[0.84, 1.08]	0.45927	0.372856	FALSE	FALSE
AAT	Z34	Supervision of normal pregnancy	FINRISK97	7512	141	36	0.97	0.0824	[0.83, 1.14]	0.738449	0.469708	FALSE	FALSE
AAT	Z34	Supervision of normal pregnancy	DILGOM07	4769	75	160	0.92	0.1118	[0.74, 1.15]	0.481338	0.484992	FALSE	FALSE
AAT	Z35	Supervision of high risk pregnancy	Meta-analysis	12281	154	92	0.880556	0.0785925	[0.75, 1.03]	0.105554	0.144808	FALSE	FALSE
AAT	Z35	Supervision of high risk pregnancy	FINRISK97	7512	101	7	0.86	0.0975	[0.71, 1.04]	0.124039	0.221875	FALSE	FALSE
AAT	Z35	Supervision of high risk pregnancy	DILGOM07	4769	53	85	0.92	0.1328	[0.71, 1.20]	0.543004	0.511773	FALSE	FALSE
AAT	Z36	Antenatal screening	Meta-analysis	12281	258	124	1.03803	0.0588031	[0.93, 1.16]	0.525627	0.39837	FALSE	FALSE
AAT	Z36	Antenatal screening	FINRISK97	7512	138	0	1.1	0.0801	[0.94, 1.28]	0.252819	0.321657	FALSE	FALSE
AAT	Z36	Antenatal screening	DILGOM07	4769	120	124	0.97	0.0866	[0.82, 1.15]	0.747897	0.585004	FALSE	FALSE
AAT	Z36	Antenatal screening	Training	615	22	<10	0.73	0.222133	[0.47, 1.13]	0.156551	0.342921	FALSE	FALSE
AAT	Z36	Antenatal screening	Immunoassayed	630	22	<10	0.88	0.179104	[0.63, 1.24]	0.475389	0.746578	FALSE	FALSE
AAT	Z37	Outcome of delivery	Meta-analysis	12281	62	41	0.940947	0.11836	[0.75, 1.19]	0.607066	0.431952	FALSE	FALSE
AAT	Z37	Outcome of delivery	FINRISK97	7512	31	4	1.07	0.1498	[0.80, 1.44]	0.642522	0.446463	FALSE	FALSE
AAT	Z37	Outcome of delivery	DILGOM07	4769	31	37	0.76	0.1931	[0.52, 1.11]	0.161312	0.264974	FALSE	FALSE
AAT	Z40-Z54	Persons encountering health services for specific procedures and health care	Meta-analysis	12281	257	88	1.24063	0.0621742	[1.10, 1.40]	0.000524401	0.00224747	TRUE	FALSE
AAT	Z40-Z54	Persons encountering health services for specific procedures and health care	FINRISK97	7512	115	7	1.06	0.096	[0.88, 1.28]	0.551669	0.435225	FALSE	FALSE
AAT	Z40-Z54	Persons encountering health services for specific procedures and health care	DILGOM07	4769	142	81	1.39	0.0816	[1.19, 1.63]	5.20728e-05	0.000997916	TRUE	FALSE
AAT	Z40-Z54	Persons encountering health services for specific procedures and health care	Training	615	25	<10	1.78	0.188382	[1.23, 2.59]	0.00220697	0.025456	FALSE	FALSE
AAT	Z40-Z54	Persons encountering health services for specific procedures and health care	Immunoassayed	630	25	<10	1.24	0.242928	[0.77, 1.97]	0.37589	0.717374	FALSE	FALSE
AAT	Z70-Z76	Persons encountering health services in other circumstances	Meta-analysis	12281	209	73	1.08565	0.0735732	[0.94, 1.25]	0.264026	0.274899	FALSE	FALSE
AAT	Z70-Z76	Persons encountering health services in other circumstances	FINRISK97	7512	69	12	1.24	0.124	[0.98, 1.59]	0.0779215	0.188572	FALSE	FALSE
AAT	Z70-Z76	Persons encountering health services in other circumstances	DILGOM07	4769	140	61	1.01	0.0914	[0.85, 1.21]	0.880259	0.620533	FALSE	FALSE
AAT	Z71	Persons encountering health services for other counselling and medical advice not elsewhere classified	Meta-analysis	12281	126	40	1.12818	0.092611	[0.94, 1.35]	0.192806	0.227769	FALSE	FALSE
AAT	Z71	Persons encountering health services for other counselling and medical advice not elsewhere classified	FINRISK97	7512	29	4	1.23	0.1946	[0.84, 1.80]	0.290932	0.338366	FALSE	FALSE
AAT	Z71	Persons encountering health services for other counselling and medical advice not elsewhere classified	DILGOM07	4769	97	36	1.1	0.1053	[0.89, 1.35]	0.372333	0.42599	FALSE	FALSE
AAT	Z80-Z99	Persons with potential health hazards related to family and personal history and certain conditions influencing health status	Meta-analysis	12281	535	103	1.0482	0.0454264	[0.96, 1.15]	0.300087	0.295736	FALSE	FALSE
AAT	Z80-Z99	Persons with potential health hazards related to family and personal history and certain conditions influencing health status	FINRISK97	7512	292	9	1.03	0.0618	[0.91, 1.16]	0.6321	0.446463	FALSE	FALSE
AAT	Z80-Z99	Persons with potential health hazards related to family and personal history and certain conditions influencing health status	DILGOM07	4769	243	94	1.07	0.067	[0.94, 1.22]	0.320084	0.399775	FALSE	FALSE
AAT	Z80-Z99	Persons with potential health hazards related to family and personal history and certain conditions influencing health status	Training	615	24	<10	1.27	0.201309	[0.86, 1.89]	0.235103	0.415952	FALSE	FALSE
AAT	Z80-Z99	Persons with potential health hazards related to family and personal history and certain conditions influencing health status	Immunoassayed	630	24	<10	1.02	0.209121	[0.65, 1.60]	0.924557	0.813598	FALSE	FALSE
AAT	Z95	Presence of cardiac and vascular implants and grafts	Meta-analysis	12281	187	36	1.06161	0.0781079	[0.91, 1.24]	0.444026	0.366915	FALSE	FALSE
AAT	Z95	Presence of cardiac and vascular implants and grafts	FINRISK97	7512	87	4	1.14	0.1074	[0.92, 1.41]	0.226641	0.316115	FALSE	FALSE
AAT	Z95	Presence of cardiac and vascular implants and grafts	DILGOM07	4769	100	32	0.98	0.1138	[0.78, 1.22]	0.842809	0.611502	FALSE	FALSE
AAT	Z96	Presence of other functional implants	Meta-analysis	12281	197	35	1.07279	0.0767268	[0.92, 1.25]	0.359819	0.326653	FALSE	FALSE
AAT	Z96	Presence of other functional implants	FINRISK97	7512	122	4	0.98	0.0989	[0.81, 1.19]	0.840487	0.476846	FALSE	FALSE
AAT	Z96	Presence of other functional implants	DILGOM07	4769	75	31	1.23	0.1216	[0.97, 1.56]	0.0896894	0.182527	FALSE	FALSE
AAT	Z97	Presence of other devices	Meta-analysis	12281	69	7	0.853194	0.135142	[0.65, 1.11]	0.240066	0.255731	FALSE	FALSE
AAT	Z97	Presence of other devices	FINRISK97	7512	39	0	0.75	0.1754	[0.53, 1.05]	0.0957118	0.207651	FALSE	FALSE
AAT	Z97	Presence of other devices	DILGOM07	4769	30	7	1.03	0.212	[0.68, 1.56]	0.898231	0.62785	FALSE	FALSE
HP	A00-A09	Intestinal infectious diseases	Meta-analysis	12216	189	214	1.3489	0.0781568	[1.16, 1.57]	0.000128467	0.00142777	TRUE	FALSE
HP	A00-A09	Intestinal infectious diseases	FINRISK97	7452	111	87	1.34	0.1051	[1.09, 1.64]	0.00565223	0.0585178	FALSE	FALSE
HP	A00-A09	Intestinal infectious diseases	DILGOM07	4764	78	127	1.36	0.1169	[1.08, 1.71]	0.00795881	0.0377008	FALSE	FALSE
HP	A09	Infectious gastroenteritis and colitis, unspecified	Meta-analysis	12216	145	136	1.42874	0.0880721	[1.20, 1.70]	5.09692e-05	0.000723817	TRUE	FALSE
HP	A09	Infectious gastroenteritis and colitis, unspecified	FINRISK97	7452	81	51	1.41	0.1212	[1.11, 1.79]	0.00473531	0.0508406	FALSE	FALSE
HP	A09	Infectious gastroenteritis and colitis, unspecified	DILGOM07	4764	64	85	1.45	0.1282	[1.13, 1.87]	0.00352599	0.0221481	FALSE	FALSE
HP	A30-A49	Other bacterial diseases	Meta-analysis	12216	321	141	1.10483	0.0648864	[0.97, 1.25]	0.124456	0.246616	FALSE	FALSE
HP	A30-A49	Other bacterial diseases	FINRISK97	7452	160	47	1.11	0.0933	[0.93, 1.34]	0.2474	0.51204	FALSE	FALSE
HP	A30-A49	Other bacterial diseases	DILGOM07	4764	161	94	1.1	0.0903	[0.93, 1.32]	0.271454	0.310151	FALSE	FALSE
HP	A30-A49	Other bacterial diseases	Training	614	23	<10	1.08	0.266049	[0.63, 1.86]	0.772372	0.672528	FALSE	FALSE
HP	A30-A49	Other bacterial diseases	Immunoassayed	626	22	<10	0.86	0.252976	[0.52, 1.42]	0.551045	0.248098	FALSE	FALSE
HP	A41	Other septicaemia	Meta-analysis	12216	63	18	1.28727	0.142748	[0.97, 1.70]	0.0768913	0.177071	FALSE	FALSE
HP	A41	Other septicaemia	FINRISK97	7452	36	7	1.22	0.19	[0.84, 1.78]	0.287896	0.538431	FALSE	FALSE
HP	A41	Other septicaemia	DILGOM07	4764	27	11	1.38	0.2163	[0.90, 2.11]	0.136197	0.228134	FALSE	FALSE
HP	A46	Erysipelas	Meta-analysis	12216	204	103	1.00584	0.0838455	[0.85, 1.19]	0.944664	0.72082	FALSE	FALSE
HP	A46	Erysipelas	FINRISK97	7452	116	37	1.06	0.1117	[0.85, 1.32]	0.59762	0.721577	FALSE	FALSE
HP	A46	Erysipelas	DILGOM07	4764	88	66	0.94	0.1269	[0.73, 1.20]	0.606234	0.43365	FALSE	FALSE
HP	A50-A64	Infections with a predominantly sexual mode of transmission	Meta-analysis	12216	81	52	1.06736	0.125736	[0.83, 1.37]	0.604128	0.580552	FALSE	FALSE
HP	A50-A64	Infections with a predominantly sexual mode of transmission	FINRISK97	7452	40	4	0.93	0.1893	[0.64, 1.34]	0.685412	0.75668	FALSE	FALSE
HP	A50-A64	Infections with a predominantly sexual mode of transmission	DILGOM07	4764	41	48	1.19	0.1682	[0.86, 1.66]	0.29061	0.314053	FALSE	FALSE
HP	A63	Other predominantly sexually transmitted diseases not elsewhere classified	Meta-analysis	12216	51	26	0.93608	0.165896	[0.68, 1.30]	0.690505	0.615196	FALSE	FALSE
HP	A63	Other predominantly sexually transmitted diseases not elsewhere classified	FINRISK97	7452	26	0	0.74	0.2428	[0.46, 1.19]	0.209542	0.489316	FALSE	FALSE
HP	A63	Other predominantly sexually transmitted diseases not elsewhere classified	DILGOM07	4764	25	26	1.15	0.2272	[0.73, 1.79]	0.54522	0.41512	FALSE	FALSE
HP	B00-B09	Viral infections characterised by skin and mucous membrane lesions	Meta-analysis	12216	102	74	1.22028	0.1097	[0.98, 1.51]	0.0695603	0.169979	FALSE	FALSE
HP	B00-B09	Viral infections characterised by skin and mucous membrane lesions	FINRISK97	7452	45	26	1.35	0.1577	[0.99, 1.84]	0.0567383	0.225309	FALSE	FALSE
HP	B00-B09	Viral infections characterised by skin and mucous membrane lesions	DILGOM07	4764	57	48	1.11	0.1527	[0.82, 1.49]	0.502807	0.3979	FALSE	FALSE
HP	C15-C26	Malignant neoplasms of digestive organs	Meta-analysis	12216	144	32	1.39388	0.0949922	[1.16, 1.68]	0.000472379	0.00402498	TRUE	FALSE
HP	C15-C26	Malignant neoplasms of digestive organs	FINRISK97	7452	82	11	1.54	0.1256	[1.21, 1.98]	0.000540419	0.01119	TRUE	FALSE
HP	C15-C26	Malignant neoplasms of digestive organs	DILGOM07	4764	62	21	1.22	0.1452	[0.92, 1.62]	0.171802	0.2558	FALSE	FALSE
HP	C18	Malignant neoplasm of colon	Meta-analysis	12216	53	10	1.55174	0.147106	[1.16, 2.07]	0.00281902	0.0141293	TRUE	FALSE
HP	C18	Malignant neoplasm of colon	FINRISK97	7452	28	4	1.74	0.2068	[1.16, 2.62]	0.00716553	0.0649119	FALSE	FALSE
HP	C18	Malignant neoplasm of colon	DILGOM07	4764	25	6	1.38	0.2093	[0.91, 2.08]	0.12559	0.217622	FALSE	FALSE
HP	C30-C39	Malignant neoplasm of respiratory and intrathoracic organs	Meta-analysis	12216	74	11	1.49339	0.12329	[1.17, 1.90]	0.00114234	0.00789204	TRUE	FALSE
HP	C30-C39	Malignant neoplasm of respiratory and intrathoracic organs	FINRISK97	7452	51	6	1.56	0.1513	[1.16, 2.10]	0.00335828	0.0439141	FALSE	FALSE
HP	C30-C39	Malignant neoplasm of respiratory and intrathoracic organs	DILGOM07	4764	23	5	1.37	0.2127	[0.90, 2.07]	0.141952	0.229242	FALSE	FALSE
HP	C43-C44	Melanoma and other malignant neoplasms of skin	Meta-analysis	12216	168	61	1.09769	0.0900509	[0.92, 1.31]	0.300643	0.396935	FALSE	FALSE
HP	C43-C44	Melanoma and other malignant neoplasms of skin	FINRISK97	7452	65	14	1.03	0.1475	[0.78, 1.38]	0.815829	0.799883	FALSE	FALSE
HP	C43-C44	Melanoma and other malignant neoplasms of skin	DILGOM07	4764	103	47	1.14	0.1137	[0.92, 1.43]	0.234588	0.30143	FALSE	FALSE
HP	C44	Other malignant neoplasms of skin	Meta-analysis	12216	134	41	1.08159	0.100685	[0.89, 1.32]	0.435975	0.476256	FALSE	FALSE
HP	C44	Other malignant neoplasms of skin	FINRISK97	7452	46	9	0.99	0.175	[0.70, 1.39]	0.950618	0.812891	FALSE	FALSE
HP	C44	Other malignant neoplasms of skin	DILGOM07	4764	88	32	1.13	0.1231	[0.89, 1.43]	0.332791	0.332799	FALSE	FALSE
HP	C50-C50	Malignant neoplasm of breast	Meta-analysis	12216	160	92	1.16485	0.0983896	[0.96, 1.41]	0.120923	0.241487	FALSE	FALSE
HP	C50-C50	Malignant neoplasm of breast	FINRISK97	7452	81	29	1.2	0.1384	[0.92, 1.58]	0.181978	0.447056	FALSE	FALSE
HP	C50-C50	Malignant neoplasm of breast	DILGOM07	4764	79	63	1.13	0.1399	[0.86, 1.48]	0.386281	0.357983	FALSE	FALSE
HP	C50	Malignant neoplasm of breast	Meta-analysis	12216	160	92	1.16485	0.0983896	[0.96, 1.41]	0.120923	0.241487	FALSE	FALSE
HP	C50	Malignant neoplasm of breast	FINRISK97	7452	81	29	1.2	0.1384	[0.92, 1.58]	0.181978	0.447056	FALSE	FALSE
HP	C50	Malignant neoplasm of breast	DILGOM07	4764	79	63	1.13	0.1399	[0.86, 1.48]	0.386281	0.357983	FALSE	FALSE
HP	C60-C63	Malignant neoplasms of male genital organs	Meta-analysis	12216	172	42	1.10662	0.084079	[0.94, 1.30]	0.228246	0.341386	FALSE	FALSE
HP	C60-C63	Malignant neoplasms of male genital organs	FINRISK97	7452	99	13	1.08	0.1134	[0.87, 1.35]	0.478131	0.689567	FALSE	FALSE
HP	C60-C63	Malignant neoplasms of male genital organs	DILGOM07	4764	73	29	1.14	0.1253	[0.89, 1.45]	0.310535	0.321446	FALSE	FALSE
HP	C61	Malignant neoplasm of prostate	Meta-analysis	12216	168	39	1.12214	0.0847566	[0.95, 1.32]	0.173961	0.29064	FALSE	FALSE
HP	C61	Malignant neoplasm of prostate	FINRISK97	7452	97	12	1.1	0.1141	[0.88, 1.38]	0.403582	0.628991	FALSE	FALSE
HP	C61	Malignant neoplasm of prostate	DILGOM07	4764	71	27	1.15	0.1266	[0.90, 1.48]	0.258683	0.310151	FALSE	FALSE
HP	C64-C68	Malignant neoplasm of urinary tract	Meta-analysis	12216	63	28	1.37182	0.150665	[1.02, 1.84]	0.0358802	0.107902	FALSE	FALSE
HP	C64-C68	Malignant neoplasm of urinary tract	FINRISK97	7452	38	12	1.41	0.1812	[0.99, 2.01]	0.057981	0.227133	FALSE	FALSE
HP	C64-C68	Malignant neoplasm of urinary tract	DILGOM07	4764	25	16	1.29	0.2712	[0.76, 2.19]	0.352838	0.342619	FALSE	FALSE
HP	C81-C96	Malignant neoplasm of lymphoid haematopoietic and related tissue	Meta-analysis	12216	80	23	1.16	0.132596	[0.89, 1.50]	0.262995	0.375568	FALSE	FALSE
HP	C81-C96	Malignant neoplasm of lymphoid haematopoietic and related tissue	FINRISK97	7452	49	8	1.16	0.1732	[0.83, 1.63]	0.385905	0.618056	FALSE	FALSE
HP	C81-C96	Malignant neoplasm of lymphoid haematopoietic and related tissue	DILGOM07	4764	31	15	1.16	0.2061	[0.77, 1.74]	0.472735	0.383153	FALSE	FALSE
HP	D00-D09	In situ neoplasms	Meta-analysis	12216	54	25	1.16887	0.152661	[0.87, 1.58]	0.306739	0.396935	FALSE	FALSE
HP	D00-D09	In situ neoplasms	FINRISK97	7452	25	7	0.96	0.2385	[0.60, 1.53]	0.859984	0.800996	FALSE	FALSE
HP	D00-D09	In situ neoplasms	DILGOM07	4764	29	18	1.34	0.1987	[0.91, 1.97]	0.144839	0.231058	FALSE	FALSE
HP	D10-D36	Benign neoplasms	Meta-analysis	12216	931	895	1.04042	0.0386644	[0.96, 1.12]	0.305413	0.396935	FALSE	FALSE
HP	D10-D36	Benign neoplasms	FINRISK97	7452	542	318	1.01	0.0518	[0.91, 1.12]	0.81433	0.799883	FALSE	FALSE
HP	D10-D36	Benign neoplasms	DILGOM07	4764	389	577	1.08	0.0581	[0.96, 1.21]	0.184372	0.265946	FALSE	FALSE
HP	D10-D36	Benign neoplasms	Training	614	49	<10	1.02	0.147376	[0.75, 1.39]	0.893111	0.679372	FALSE	FALSE
HP	D10-D36	Benign neoplasms	Immunoassayed	626	50	<10	1.07	0.147161	[0.79, 1.46]	0.645689	0.260109	FALSE	FALSE
HP	D12	Benign neoplasm of colon rectum anus and anal canal	Meta-analysis	12216	201	54	1.09792	0.0818797	[0.94, 1.29]	0.253927	0.364655	FALSE	FALSE
HP	D12	Benign neoplasm of colon rectum anus and anal canal	FINRISK97	7452	101	5	1.02	0.1164	[0.81, 1.28]	0.858084	0.800996	FALSE	FALSE
HP	D12	Benign neoplasm of colon rectum anus and anal canal	DILGOM07	4764	100	49	1.18	0.1152	[0.95, 1.48]	0.141501	0.229242	FALSE	FALSE
HP	D17	Benign lipomatous neoplasm	Meta-analysis	12216	92	63	0.969907	0.124226	[0.76, 1.24]	0.805708	0.668684	FALSE	FALSE
HP	D17	Benign lipomatous neoplasm	FINRISK97	7452	50	20	1.04	0.1672	[0.75, 1.44]	0.825906	0.800996	FALSE	FALSE
HP	D17	Benign lipomatous neoplasm	DILGOM07	4764	42	43	0.89	0.1856	[0.62, 1.28]	0.529216	0.406281	FALSE	FALSE
HP	D22	Melanocytic naevi	Meta-analysis	12216	53	25	1.15768	0.152502	[0.86, 1.56]	0.336999	0.418422	FALSE	FALSE
HP	D22	Melanocytic naevi	FINRISK97	7452	28	2	1	0.2254	[0.64, 1.55]	0.994683	0.823839	FALSE	FALSE
HP	D22	Melanocytic naevi	DILGOM07	4764	25	23	1.31	0.2071	[0.88, 1.97]	0.188453	0.268274	FALSE	FALSE
HP	D23	Other benign neoplasms of skin	Meta-analysis	12216	109	74	1.0221	0.111351	[0.82, 1.27]	0.844348	0.674474	FALSE	FALSE
HP	D23	Other benign neoplasms of skin	FINRISK97	7452	59	11	1.05	0.1512	[0.78, 1.41]	0.768101	0.796421	FALSE	FALSE
HP	D23	Other benign neoplasms of skin	DILGOM07	4764	50	63	0.99	0.1646	[0.72, 1.37]	0.948198	0.562218	FALSE	FALSE
HP	D25	Leiomyoma of uterus	Meta-analysis	12216	248	438	0.975299	0.0762427	[0.84, 1.13]	0.742871	0.639368	FALSE	FALSE
HP	D25	Leiomyoma of uterus	FINRISK97	7452	181	195	0.99	0.0904	[0.83, 1.19]	0.946703	0.812891	FALSE	FALSE
HP	D25	Leiomyoma of uterus	DILGOM07	4764	67	243	0.94	0.1419	[0.71, 1.24]	0.650868	0.455845	FALSE	FALSE
HP	D37-D48	Neoplasms of uncertain or unknown behaviour	Meta-analysis	12216	345	123	1.10749	0.0618314	[0.98, 1.25]	0.0987086	0.210265	FALSE	FALSE
HP	D37-D48	Neoplasms of uncertain or unknown behaviour	FINRISK97	7452	188	9	1.05	0.0868	[0.89, 1.24]	0.578378	0.717393	FALSE	FALSE
HP	D37-D48	Neoplasms of uncertain or unknown behaviour	DILGOM07	4764	157	114	1.17	0.0881	[0.98, 1.39]	0.0770432	0.162529	FALSE	FALSE
HP	D37-D48	Neoplasms of uncertain or unknown behaviour	Training	614	24	<10	0.51	0.253719	[0.31, 0.84]	0.00795678	0.0365077	FALSE	FALSE
HP	D37-D48	Neoplasms of uncertain or unknown behaviour	Immunoassayed	626	24	<10	0.63	0.18866	[0.43, 0.91]	0.0143236	0.0398335	FALSE	FALSE
HP	D37	Neoplasm of uncertain or unknown behaviour of oral cavity and digestive organs	Meta-analysis	12216	62	18	1.05311	0.146988	[0.79, 1.40]	0.724795	0.635711	FALSE	FALSE
HP	D37	Neoplasm of uncertain or unknown behaviour of oral cavity and digestive organs	FINRISK97	7452	24	0	0.9	0.2453	[0.56, 1.46]	0.681791	0.75668	FALSE	FALSE
HP	D37	Neoplasm of uncertain or unknown behaviour of oral cavity and digestive organs	DILGOM07	4764	38	18	1.15	0.1836	[0.80, 1.64]	0.460574	0.379416	FALSE	FALSE
HP	D48	Neoplasm of uncertain or unknown behaviour of other and unspecified sites	Meta-analysis	12216	118	55	0.928179	0.110654	[0.75, 1.15]	0.500601	0.51807	FALSE	FALSE
HP	D48	Neoplasm of uncertain or unknown behaviour of other and unspecified sites	FINRISK97	7452	66	5	0.78	0.1554	[0.57, 1.05]	0.101104	0.322073	FALSE	FALSE
HP	D48	Neoplasm of uncertain or unknown behaviour of other and unspecified sites	DILGOM07	4764	52	50	1.11	0.1576	[0.81, 1.51]	0.523456	0.406281	FALSE	FALSE
HP	D50-D53	Nutritional anaemias	Meta-analysis	12216	84	41	1.50021	0.118208	[1.19, 1.89]	0.000600802	0.00479927	TRUE	FALSE
HP	D50-D53	Nutritional anaemias	FINRISK97	7452	36	19	1.67	0.1888	[1.15, 2.41]	0.00688503	0.0643828	FALSE	FALSE
HP	D50-D53	Nutritional anaemias	DILGOM07	4764	48	22	1.4	0.1516	[1.04, 1.88]	0.0273393	0.0820198	FALSE	FALSE
HP	D50	Iron deficiency anaemia	Meta-analysis	12216	75	35	1.4828	0.124064	[1.16, 1.89]	0.00149725	0.00890061	TRUE	FALSE
HP	D50	Iron deficiency anaemia	FINRISK97	7452	30	17	1.56	0.2051	[1.04, 2.33]	0.0304139	0.157438	FALSE	FALSE
HP	D50	Iron deficiency anaemia	DILGOM07	4764	45	18	1.44	0.1558	[1.06, 1.95]	0.0199298	0.0661352	FALSE	FALSE
HP	D60-D64	Aplastic and other anaemias	Meta-analysis	12216	101	20	1.33487	0.110216	[1.08, 1.66]	0.00877748	0.033488	FALSE	FALSE
HP	D60-D64	Aplastic and other anaemias	FINRISK97	7452	48	7	1.19	0.1748	[0.85, 1.68]	0.310287	0.569471	FALSE	FALSE
HP	D60-D64	Aplastic and other anaemias	DILGOM07	4764	53	13	1.44	0.142	[1.09, 1.90]	0.010474	0.0467848	FALSE	FALSE
HP	D64	Other anaemias	Meta-analysis	12216	83	15	1.404	0.119923	[1.11, 1.78]	0.00466189	0.0212798	FALSE	FALSE
HP	D64	Other anaemias	FINRISK97	7452	37	3	1.11	0.2006	[0.75, 1.65]	0.593627	0.721577	FALSE	FALSE
HP	D64	Other anaemias	DILGOM07	4764	46	12	1.6	0.1496	[1.19, 2.15]	0.00162917	0.0152583	TRUE	FALSE
HP	E00-E07	Disorders of thyroid gland	Meta-analysis	12216	217	154	1.00434	0.0829237	[0.85, 1.18]	0.95834	0.722313	FALSE	FALSE
HP	E00-E07	Disorders of thyroid gland	FINRISK97	7452	106	50	0.87	0.1235	[0.68, 1.11]	0.249759	0.51204	FALSE	FALSE
HP	E00-E07	Disorders of thyroid gland	DILGOM07	4764	111	104	1.13	0.1119	[0.91, 1.41]	0.273261	0.310151	FALSE	FALSE
HP	E03	Other hypothyroidism	Meta-analysis	12216	91	31	1.01818	0.12479	[0.80, 1.30]	0.885225	0.70056	FALSE	FALSE
HP	E03	Other hypothyroidism	FINRISK97	7452	36	11	1.14	0.2024	[0.77, 1.70]	0.503834	0.691897	FALSE	FALSE
HP	E03	Other hypothyroidism	DILGOM07	4764	55	20	0.95	0.1585	[0.70, 1.30]	0.756488	0.490508	FALSE	FALSE
HP	E04	Other non toxic goitre	Meta-analysis	12216	81	79	0.984932	0.137752	[0.75, 1.29]	0.912239	0.715295	FALSE	FALSE
HP	E04	Other non toxic goitre	FINRISK97	7452	45	28	0.74	0.1992	[0.50, 1.09]	0.131951	0.380556	FALSE	FALSE
HP	E04	Other non toxic goitre	DILGOM07	4764	36	51	1.28	0.1907	[0.88, 1.85]	0.201338	0.276349	FALSE	FALSE
HP	E10-E14	Diabetes mellitus	Meta-analysis	12216	426	147	1.24765	0.057558	[1.11, 1.40]	0.000120992	0.00140582	TRUE	FALSE
HP	E10-E14	Diabetes mellitus	FINRISK97	7452	233	81	1.09	0.0812	[0.93, 1.28]	0.264981	0.519015	FALSE	FALSE
HP	E10-E14	Diabetes mellitus	DILGOM07	4764	193	66	1.43	0.0816	[1.22, 1.68]	9.97914e-06	0.000438486	TRUE	FALSE
HP	E10	Insulin dependent diabetes mellitus	Meta-analysis	12216	60	24	1.03712	0.155625	[0.76, 1.41]	0.81481	0.669715	FALSE	FALSE
HP	E10	Insulin dependent diabetes mellitus	FINRISK97	7452	39	6	0.97	0.1804	[0.68, 1.38]	0.867737	0.800996	FALSE	FALSE
HP	E10	Insulin dependent diabetes mellitus	DILGOM07	4764	21	18	1.26	0.3077	[0.69, 2.30]	0.45722	0.378202	FALSE	FALSE
HP	E11	Type 2 diabetes mellitus	Meta-analysis	12216	390	138	1.32936	0.0598558	[1.18, 1.49]	1.97092e-06	5.03775e-05	TRUE	FALSE
HP	E11	Type 2 diabetes mellitus	FINRISK97	7452	210	78	1.22	0.0844	[1.03, 1.44]	0.0190326	0.11994	FALSE	FALSE
HP	E11	Type 2 diabetes mellitus	DILGOM07	4764	180	60	1.45	0.0849	[1.23, 1.71]	1.20382e-05	0.000438486	TRUE	FALSE
HP	E65-E68	Obesity and other hyperalimentation	Meta-analysis	12216	143	75	1.20621	0.102087	[0.99, 1.47]	0.066279	0.169979	FALSE	FALSE
HP	E65-E68	Obesity and other hyperalimentation	FINRISK97	7452	61	26	1.1	0.1631	[0.80, 1.52]	0.551515	0.717393	FALSE	FALSE
HP	E65-E68	Obesity and other hyperalimentation	DILGOM07	4764	82	49	1.28	0.1309	[0.99, 1.66]	0.0587456	0.138919	FALSE	FALSE
HP	E66	Obesity	Meta-analysis	12216	142	75	1.21089	0.102794	[0.99, 1.48]	0.0626716	0.16347	FALSE	FALSE
HP	E66	Obesity	FINRISK97	7452	61	26	1.1	0.1631	[0.80, 1.52]	0.551515	0.717393	FALSE	FALSE
HP	E66	Obesity	DILGOM07	4764	81	49	1.29	0.1324	[0.99, 1.67]	0.0580751	0.138919	FALSE	FALSE
HP	E70-E90	Metabolic disorders	Meta-analysis	12216	368	135	1.10888	0.0601367	[0.99, 1.25]	0.0856942	0.193851	FALSE	FALSE
HP	E70-E90	Metabolic disorders	FINRISK97	7452	156	41	1.06	0.0975	[0.87, 1.28]	0.573983	0.717393	FALSE	FALSE
HP	E70-E90	Metabolic disorders	DILGOM07	4764	212	94	1.14	0.0764	[0.99, 1.33]	0.0776243	0.162529	FALSE	FALSE
HP	E78	Disorders of lipoprotein metabolism and other lipidaemias	Meta-analysis	12216	272	92	1.08131	0.0707514	[0.94, 1.24]	0.269203	0.378096	FALSE	FALSE
HP	E78	Disorders of lipoprotein metabolism and other lipidaemias	FINRISK97	7452	95	21	1.04	0.128	[0.81, 1.33]	0.773056	0.796421	FALSE	FALSE
HP	E78	Disorders of lipoprotein metabolism and other lipidaemias	DILGOM07	4764	177	71	1.1	0.0849	[0.93, 1.30]	0.26372	0.310151	FALSE	FALSE
HP	F00-F09	Organic including symptomatic mental disorders	Meta-analysis	12216	143	21	1.00705	0.0959369	[0.83, 1.22]	0.941611	0.720641	FALSE	FALSE
HP	F00-F09	Organic including symptomatic mental disorders	FINRISK97	7452	88	6	1.06	0.123	[0.83, 1.35]	0.62514	0.730721	FALSE	FALSE
HP	F00-F09	Organic including symptomatic mental disorders	DILGOM07	4764	55	15	0.93	0.1533	[0.69, 1.25]	0.612034	0.436246	FALSE	FALSE
HP	F00	Dementia in Alzheimer's disease	Meta-analysis	12216	61	3	0.895208	0.146383	[0.67, 1.19]	0.449513	0.484828	FALSE	FALSE
HP	F00	Dementia in Alzheimer's disease	FINRISK97	7452	34	1	0.95	0.1956	[0.65, 1.40]	0.806243	0.799883	FALSE	FALSE
HP	F00	Dementia in Alzheimer's disease	DILGOM07	4764	27	2	0.83	0.2207	[0.54, 1.28]	0.392486	0.357983	FALSE	FALSE
HP	F10-F19	Mental and behavioural disorders due to psychoactive substance use	Meta-analysis	12216	209	168	1.30545	0.0755143	[1.13, 1.51]	0.000415852	0.00379642	TRUE	FALSE
HP	F10-F19	Mental and behavioural disorders due to psychoactive substance use	FINRISK97	7452	145	88	1.28	0.0919	[1.07, 1.54]	0.00640055	0.0618474	FALSE	FALSE
HP	F10-F19	Mental and behavioural disorders due to psychoactive substance use	DILGOM07	4764	64	80	1.36	0.1325	[1.05, 1.77]	0.0198366	0.0661352	FALSE	FALSE
HP	F10	Mental and behavioural disorders due to use of alcohol	Meta-analysis	12216	177	158	1.24499	0.0826451	[1.06, 1.46]	0.00801577	0.0320154	FALSE	FALSE
HP	F10	Mental and behavioural disorders due to use of alcohol	FINRISK97	7452	126	87	1.26	0.0985	[1.04, 1.53]	0.0179265	0.11548	FALSE	FALSE
HP	F10	Mental and behavioural disorders due to use of alcohol	DILGOM07	4764	51	71	1.21	0.1519	[0.90, 1.63]	0.203309	0.276349	FALSE	FALSE
HP	F20-F29	Schizophrenia schizotypal and delusional disorders	Meta-analysis	12216	90	95	1.06485	0.12796	[0.83, 1.37]	0.623411	0.58803	FALSE	FALSE
HP	F20-F29	Schizophrenia schizotypal and delusional disorders	FINRISK97	7452	62	50	1.1	0.1576	[0.81, 1.50]	0.542178	0.717393	FALSE	FALSE
HP	F20-F29	Schizophrenia schizotypal and delusional disorders	DILGOM07	4764	28	45	1	0.2192	[0.65, 1.54]	0.998676	0.573538	FALSE	FALSE
HP	F30-F39	Mood [affective] disorders	Meta-analysis	12216	358	265	1.11601	0.0608117	[0.99, 1.26]	0.0710935	0.1708	FALSE	FALSE
HP	F30-F39	Mood [affective] disorders	FINRISK97	7452	208	110	1	0.0816	[0.85, 1.17]	0.993829	0.823839	FALSE	FALSE
HP	F30-F39	Mood [affective] disorders	DILGOM07	4764	150	155	1.28	0.0912	[1.07, 1.53]	0.00654204	0.0365272	FALSE	FALSE
HP	F31	Bipolar affective disorder	Meta-analysis	12216	45	55	1.17726	0.170038	[0.84, 1.64]	0.3372	0.418422	FALSE	FALSE
HP	F31	Bipolar affective disorder	FINRISK97	7452	21	37	1.03	0.2551	[0.63, 1.70]	0.905894	0.800996	FALSE	FALSE
HP	F31	Bipolar affective disorder	DILGOM07	4764	24	18	1.31	0.2281	[0.84, 2.05]	0.238547	0.30143	FALSE	FALSE
HP	F32	Depressive episode	Meta-analysis	12216	278	143	1.14323	0.0691697	[1.00, 1.31]	0.0529653	0.147163	FALSE	FALSE
HP	F32	Depressive episode	FINRISK97	7452	167	23	1.05	0.0903	[0.88, 1.25]	0.609579	0.721577	FALSE	FALSE
HP	F32	Depressive episode	DILGOM07	4764	111	120	1.29	0.1076	[1.04, 1.59]	0.018513	0.0641585	FALSE	FALSE
HP	F33	Recurrent depressive disorder	Meta-analysis	12216	107	40	0.971935	0.113781	[0.78, 1.21]	0.802443	0.668684	FALSE	FALSE
HP	F33	Recurrent depressive disorder	FINRISK97	7452	48	2	0.66	0.185	[0.46, 0.95]	0.026259	0.140965	FALSE	FALSE
HP	F33	Recurrent depressive disorder	DILGOM07	4764	59	38	1.23	0.1443	[0.93, 1.63]	0.149248	0.235506	FALSE	FALSE
HP	F40-F48	Neurotic, stress-related and somatoform disorders	Meta-analysis	12216	221	133	1.09204	0.0769025	[0.94, 1.27]	0.252255	0.364301	FALSE	FALSE
HP	F40-F48	Neurotic, stress-related and somatoform disorders	FINRISK97	7452	123	39	1.06	0.1052	[0.86, 1.30]	0.596392	0.721577	FALSE	FALSE
HP	F40-F48	Neurotic, stress-related and somatoform disorders	DILGOM07	4764	98	94	1.13	0.1127	[0.91, 1.41]	0.276622	0.310151	FALSE	FALSE
HP	F41	Other anxiety disorders	Meta-analysis	12216	99	52	1.23616	0.111387	[0.99, 1.54]	0.0569944	0.152548	FALSE	FALSE
HP	F41	Other anxiety disorders	FINRISK97	7452	58	11	1.18	0.1495	[0.88, 1.58]	0.272011	0.525679	FALSE	FALSE
HP	F41	Other anxiety disorders	DILGOM07	4764	41	41	1.31	0.167	[0.94, 1.81]	0.109232	0.203297	FALSE	FALSE
HP	F43	Reaction to severe stress and adjustment disorders	Meta-analysis	12216	88	55	1.05412	0.123269	[0.83, 1.34]	0.668984	0.60856	FALSE	FALSE
HP	F43	Reaction to severe stress and adjustment disorders	FINRISK97	7452	44	14	0.76	0.1895	[0.52, 1.10]	0.148284	0.405324	FALSE	FALSE
HP	F43	Reaction to severe stress and adjustment disorders	DILGOM07	4764	44	41	1.34	0.1623	[0.97, 1.84]	0.0749819	0.162529	FALSE	FALSE
HP	G20-G26	Extrapyramidal and movement disorders	Meta-analysis	12216	119	26	1.17247	0.106662	[0.95, 1.45]	0.135768	0.2594	FALSE	FALSE
HP	G20-G26	Extrapyramidal and movement disorders	FINRISK97	7452	61	6	1.11	0.15	[0.83, 1.49]	0.483293	0.690144	FALSE	FALSE
HP	G20-G26	Extrapyramidal and movement disorders	DILGOM07	4764	58	20	1.24	0.1517	[0.92, 1.66]	0.161962	0.248972	FALSE	FALSE
HP	G20	Parkinson's disease	Meta-analysis	12216	56	10	0.906348	0.164796	[0.66, 1.25]	0.550715	0.558625	FALSE	FALSE
HP	G20	Parkinson's disease	FINRISK97	7452	29	1	0.87	0.2401	[0.54, 1.39]	0.555084	0.717393	FALSE	FALSE
HP	G20	Parkinson's disease	DILGOM07	4764	27	9	0.94	0.2266	[0.60, 1.47]	0.785291	0.503043	FALSE	FALSE
HP	G30-G32	Other degenerative diseases of the central nervous system	Meta-analysis	12216	92	4	0.968782	0.118574	[0.77, 1.22]	0.789104	0.662564	FALSE	FALSE
HP	G30-G32	Other degenerative diseases of the central nervous system	FINRISK97	7452	44	1	0.99	0.1721	[0.71, 1.39]	0.950291	0.812891	FALSE	FALSE
HP	G30-G32	Other degenerative diseases of the central nervous system	DILGOM07	4764	48	3	0.95	0.1636	[0.69, 1.30]	0.738964	0.485408	FALSE	FALSE
HP	G30	Alzheimer's disease	Meta-analysis	12216	80	2	0.901257	0.128034	[0.70, 1.16]	0.416785	0.469313	FALSE	FALSE
HP	G30	Alzheimer's disease	FINRISK97	7452	37	1	0.95	0.1866	[0.66, 1.37]	0.784394	0.796421	FALSE	FALSE
HP	G30	Alzheimer's disease	DILGOM07	4764	43	1	0.86	0.176	[0.61, 1.22]	0.40693	0.360329	FALSE	FALSE
HP	G40-G47	Episodic and paroxysmal disorders	Meta-analysis	12216	859	474	1.03243	0.039862	[0.95, 1.12]	0.42337	0.472583	FALSE	FALSE
HP	G40-G47	Episodic and paroxysmal disorders	FINRISK97	7452	463	145	0.99	0.0554	[0.89, 1.11]	0.918735	0.806041	FALSE	FALSE
HP	G40-G47	Episodic and paroxysmal disorders	DILGOM07	4764	396	329	1.08	0.0574	[0.96, 1.21]	0.196955	0.27424	FALSE	FALSE
HP	G40-G47	Episodic and paroxysmal disorders	Training	614	38	<10	0.98	0.218434	[0.68, 1.42]	0.92631	0.679372	FALSE	FALSE
HP	G40-G47	Episodic and paroxysmal disorders	Immunoassayed	626	38	<10	1.05	0.16324	[0.75, 1.49]	0.765027	0.267822	FALSE	FALSE
HP	G40	Epilepsy	Meta-analysis	12216	119	51	1.15747	0.101856	[0.95, 1.41]	0.15108	0.272772	FALSE	FALSE
HP	G40	Epilepsy	FINRISK97	7452	75	14	1.11	0.1365	[0.85, 1.45]	0.458064	0.680587	FALSE	FALSE
HP	G40	Epilepsy	DILGOM07	4764	44	37	1.22	0.153	[0.90, 1.65]	0.19136	0.26898	FALSE	FALSE
HP	G43	Migraine	Meta-analysis	12216	112	73	1.08027	0.10948	[0.87, 1.34]	0.480636	0.508485	FALSE	FALSE
HP	G43	Migraine	FINRISK97	7452	50	19	0.97	0.1631	[0.70, 1.33]	0.845961	0.800996	FALSE	FALSE
HP	G43	Migraine	DILGOM07	4764	62	54	1.18	0.1477	[0.88, 1.57]	0.266497	0.310151	FALSE	FALSE
HP	G44	Other headache syndromes	Meta-analysis	12216	173	119	0.976248	0.0905122	[0.82, 1.17]	0.790558	0.662564	FALSE	FALSE
HP	G44	Other headache syndromes	FINRISK97	7452	113	40	0.98	0.1144	[0.79, 1.23]	0.88649	0.800996	FALSE	FALSE
HP	G44	Other headache syndromes	DILGOM07	4764	60	79	0.97	0.148	[0.72, 1.29]	0.817157	0.518146	FALSE	FALSE
HP	G45	Transient cerebral ischaemic attacks and related syndromes	Meta-analysis	12216	242	90	0.970055	0.0756017	[0.84, 1.12]	0.687581	0.615196	FALSE	FALSE
HP	G45	Transient cerebral ischaemic attacks and related syndromes	FINRISK97	7452	140	26	0.9	0.1027	[0.74, 1.11]	0.330133	0.585758	FALSE	FALSE
HP	G45	Transient cerebral ischaemic attacks and related syndromes	DILGOM07	4764	102	64	1.06	0.1117	[0.85, 1.32]	0.619717	0.440162	FALSE	FALSE
HP	G47	Sleep disorders	Meta-analysis	12216	264	166	1.05377	0.0747217	[0.91, 1.22]	0.483382	0.508485	FALSE	FALSE
HP	G47	Sleep disorders	FINRISK97	7452	113	46	0.92	0.1194	[0.73, 1.16]	0.492702	0.691897	FALSE	FALSE
HP	G47	Sleep disorders	DILGOM07	4764	151	120	1.15	0.0958	[0.95, 1.39]	0.14256	0.229242	FALSE	FALSE
HP	G50-G59	Nerve nerve root and plexus disorders	Meta-analysis	12216	457	337	1.04619	0.0556473	[0.94, 1.17]	0.417062	0.469313	FALSE	FALSE
HP	G50-G59	Nerve nerve root and plexus disorders	FINRISK97	7452	266	102	0.94	0.0753	[0.82, 1.09]	0.449786	0.672094	FALSE	FALSE
HP	G50-G59	Nerve nerve root and plexus disorders	DILGOM07	4764	191	235	1.19	0.0826	[1.01, 1.40]	0.036009	0.100527	FALSE	FALSE
HP	G56	Mononeuropathies of upper limb	Meta-analysis	12216	284	196	1.04136	0.0712343	[0.91, 1.20]	0.569375	0.573005	FALSE	FALSE
HP	G56	Mononeuropathies of upper limb	FINRISK97	7452	150	66	0.84	0.1028	[0.69, 1.03]	0.0865809	0.291843	FALSE	FALSE
HP	G56	Mononeuropathies of upper limb	DILGOM07	4764	134	130	1.27	0.0988	[1.04, 1.54]	0.0162297	0.0608401	FALSE	FALSE
HP	G57	Mononeuropathies of lower limb	Meta-analysis	12216	55	67	1.19475	0.152641	[0.89, 1.61]	0.24372	0.353975	FALSE	FALSE
HP	G57	Mononeuropathies of lower limb	FINRISK97	7452	34	21	0.87	0.208	[0.58, 1.30]	0.495512	0.691897	FALSE	FALSE
HP	G57	Mononeuropathies of lower limb	DILGOM07	4764	21	46	1.73	0.2247	[1.12, 2.69]	0.0144515	0.0558618	FALSE	FALSE
HP	G90-G99	Other disorders of the nervous system	Meta-analysis	12216	58	43	1.24036	0.147893	[0.93, 1.66]	0.145264	0.269075	FALSE	FALSE
HP	G90-G99	Other disorders of the nervous system	FINRISK97	7452	31	13	1.75	0.1952	[1.19, 2.56]	0.00430212	0.0498849	FALSE	FALSE
HP	G90-G99	Other disorders of the nervous system	DILGOM07	4764	27	30	0.78	0.2266	[0.50, 1.22]	0.272083	0.310151	FALSE	FALSE
HP	H00-H06	Disorders of eyelid lachrymal system and orbit	Meta-analysis	12216	302	110	1.09575	0.0656543	[0.96, 1.25]	0.163682	0.278935	FALSE	FALSE
HP	H00-H06	Disorders of eyelid lachrymal system and orbit	FINRISK97	7452	139	19	1.17	0.0986	[0.97, 1.43]	0.102374	0.322573	FALSE	FALSE
HP	H00-H06	Disorders of eyelid lachrymal system and orbit	DILGOM07	4764	163	91	1.04	0.088	[0.87, 1.23]	0.670918	0.465026	FALSE	FALSE
HP	H02	Other disorders of eyelid	Meta-analysis	12216	136	39	1.02907	0.0996477	[0.85, 1.25]	0.773681	0.654861	FALSE	FALSE
HP	H02	Other disorders of eyelid	FINRISK97	7452	63	7	1.13	0.1468	[0.85, 1.51]	0.40032	0.628991	FALSE	FALSE
HP	H02	Other disorders of eyelid	DILGOM07	4764	73	32	0.95	0.1357	[0.73, 1.24]	0.702359	0.473749	FALSE	FALSE
HP	H04	Disorders of lachrymal system	Meta-analysis	12216	104	38	1.12938	0.112618	[0.91, 1.41]	0.279987	0.388968	FALSE	FALSE
HP	H04	Disorders of lachrymal system	FINRISK97	7452	42	9	1.18	0.1838	[0.83, 1.70]	0.356921	0.589205	FALSE	FALSE
HP	H04	Disorders of lachrymal system	DILGOM07	4764	62	29	1.1	0.1425	[0.83, 1.45]	0.517925	0.406281	FALSE	FALSE
HP	H10-H13	Disorders of conjunctiva	Meta-analysis	12216	95	57	1.16577	0.116162	[0.93, 1.46]	0.186685	0.3059	FALSE	FALSE
HP	H10-H13	Disorders of conjunctiva	FINRISK97	7452	58	10	1.22	0.1467	[0.92, 1.63]	0.170978	0.43099	FALSE	FALSE
HP	H10-H13	Disorders of conjunctiva	DILGOM07	4764	37	47	1.08	0.1902	[0.74, 1.57]	0.685418	0.469732	FALSE	FALSE
HP	H10	Conjunctivitis	Meta-analysis	12216	64	29	1.24	0.138329	[0.95, 1.63]	0.119929	0.241487	FALSE	FALSE
HP	H10	Conjunctivitis	FINRISK97	7452	37	4	1.24	0.178	[0.87, 1.76]	0.22904	0.499888	FALSE	FALSE
HP	H10	Conjunctivitis	DILGOM07	4764	27	25	1.24	0.2198	[0.80, 1.90]	0.332441	0.332799	FALSE	FALSE
HP	H15-H22	Disorders of sclera cornea iris and ciliary body	Meta-analysis	12216	187	102	1.17356	0.0822141	[1.00, 1.38]	0.0515812	0.144892	FALSE	FALSE
HP	H15-H22	Disorders of sclera cornea iris and ciliary body	FINRISK97	7452	103	20	1.1	0.1109	[0.89, 1.37]	0.375861	0.61013	FALSE	FALSE
HP	H15-H22	Disorders of sclera cornea iris and ciliary body	DILGOM07	4764	84	82	1.27	0.1225	[1.00, 1.62]	0.0501604	0.126031	FALSE	FALSE
HP	H16	Keratitis	Meta-analysis	12216	74	36	1.13134	0.131439	[0.87, 1.46]	0.347799	0.41911	FALSE	FALSE
HP	H16	Keratitis	FINRISK97	7452	37	4	1.19	0.1815	[0.83, 1.69]	0.343716	0.589205	FALSE	FALSE
HP	H16	Keratitis	DILGOM07	4764	37	32	1.07	0.1906	[0.73, 1.55]	0.734958	0.485228	FALSE	FALSE
HP	H20	Iridocyclitis	Meta-analysis	12216	71	33	1.56191	0.131173	[1.21, 2.02]	0.000675372	0.00523147	TRUE	FALSE
HP	H20	Iridocyclitis	FINRISK97	7452	40	8	1.41	0.1808	[0.99, 2.00]	0.0592668	0.229074	FALSE	FALSE
HP	H20	Iridocyclitis	DILGOM07	4764	31	25	1.75	0.1906	[1.21, 2.54]	0.00329084	0.0221481	FALSE	FALSE
HP	H25-H28	Disorders of lens	Meta-analysis	12216	663	202	1.13103	0.0444391	[1.04, 1.23]	0.00559223	0.0246463	FALSE	FALSE
HP	H25-H28	Disorders of lens	FINRISK97	7452	344	78	1.1	0.0644	[0.97, 1.24]	0.151008	0.405324	FALSE	FALSE
HP	H25-H28	Disorders of lens	DILGOM07	4764	319	124	1.16	0.0614	[1.03, 1.31]	0.0133634	0.0537921	FALSE	FALSE
HP	H25-H28	Disorders of lens	Training	614	43	<10	1.04	0.191447	[0.74, 1.45]	0.837678	0.672528	FALSE	FALSE
HP	H25-H28	Disorders of lens	Immunoassayed	626	43	<10	1.05	0.166734	[0.75, 1.48]	0.76981	0.267822	FALSE	FALSE
HP	H25	Senile cataract	Meta-analysis	12216	600	146	1.13621	0.0469489	[1.04, 1.25]	0.00653045	0.026497	FALSE	FALSE
HP	H25	Senile cataract	FINRISK97	7452	311	52	1.09	0.068	[0.96, 1.25]	0.195431	0.464366	FALSE	FALSE
HP	H25	Senile cataract	DILGOM07	4764	289	94	1.18	0.0649	[1.04, 1.34]	0.011178	0.047805	FALSE	FALSE
HP	H25	Senile cataract	Training	614	42	<10	1.04	0.157479	[0.75, 1.46]	0.80332	0.672528	FALSE	FALSE
HP	H25	Senile cataract	Immunoassayed	626	42	<10	1.01	0.119967	[0.72, 1.43]	0.933898	0.317689	FALSE	FALSE
HP	H26	Other cataract	Meta-analysis	12216	149	76	1.11658	0.0936226	[0.93, 1.34]	0.238886	0.350943	FALSE	FALSE
HP	H26	Other cataract	FINRISK97	7452	81	24	1.34	0.1272	[1.05, 1.72]	0.0207542	0.12534	FALSE	FALSE
HP	H26	Other cataract	DILGOM07	4764	68	52	0.9	0.1383	[0.68, 1.18]	0.428455	0.366802	FALSE	FALSE
HP	H30-H36	Disorders of choroid and retina	Meta-analysis	12216	301	96	1.03071	0.0661757	[0.91, 1.17]	0.647602	0.599782	FALSE	FALSE
HP	H30-H36	Disorders of choroid and retina	FINRISK97	7452	133	24	1.06	0.1021	[0.87, 1.30]	0.542397	0.717393	FALSE	FALSE
HP	H30-H36	Disorders of choroid and retina	DILGOM07	4764	168	72	1.01	0.0869	[0.85, 1.20]	0.884299	0.545239	FALSE	FALSE
HP	H33	Retinal detachments and breaks	Meta-analysis	12216	71	38	0.892807	0.140181	[0.68, 1.18]	0.418604	0.469313	FALSE	FALSE
HP	H33	Retinal detachments and breaks	FINRISK97	7452	29	10	0.98	0.2229	[0.63, 1.51]	0.918899	0.806041	FALSE	FALSE
HP	H33	Retinal detachments and breaks	DILGOM07	4764	42	28	0.84	0.1803	[0.59, 1.20]	0.349436	0.342501	FALSE	FALSE
HP	H35	Other retinal disorders	Meta-analysis	12216	154	40	1.1762	0.0900456	[0.99, 1.40]	0.0714951	0.1708	FALSE	FALSE
HP	H35	Other retinal disorders	FINRISK97	7452	59	7	1.38	0.1434	[1.04, 1.83]	0.0246934	0.138803	FALSE	FALSE
HP	H35	Other retinal disorders	DILGOM07	4764	95	33	1.06	0.1157	[0.84, 1.33]	0.628843	0.445071	FALSE	FALSE
HP	H36	Retinal disorders in diseases classified elsewhere	Meta-analysis	12216	54	11	1.09213	0.156801	[0.80, 1.49]	0.574084	0.573231	FALSE	FALSE
HP	H36	Retinal disorders in diseases classified elsewhere	FINRISK97	7452	31	3	0.97	0.2149	[0.64, 1.48]	0.900442	0.800996	FALSE	FALSE
HP	H36	Retinal disorders in diseases classified elsewhere	DILGOM07	4764	23	8	1.25	0.2293	[0.80, 1.96]	0.328849	0.332162	FALSE	FALSE
HP	H40-H42	Glaucoma	Meta-analysis	12216	260	126	0.935417	0.0719238	[0.81, 1.08]	0.353283	0.420028	FALSE	FALSE
HP	H40-H42	Glaucoma	FINRISK97	7452	126	45	0.93	0.1064	[0.75, 1.14]	0.474944	0.688396	FALSE	FALSE
HP	H40-H42	Glaucoma	DILGOM07	4764	134	81	0.94	0.0976	[0.78, 1.14]	0.53159	0.406281	FALSE	FALSE
HP	H40	Glaucoma	Meta-analysis	12216	260	126	0.935417	0.0719238	[0.81, 1.08]	0.353283	0.420028	FALSE	FALSE
HP	H40	Glaucoma	FINRISK97	7452	126	45	0.93	0.1064	[0.75, 1.14]	0.474944	0.688396	FALSE	FALSE
HP	H40	Glaucoma	DILGOM07	4764	134	81	0.94	0.0976	[0.78, 1.14]	0.53159	0.406281	FALSE	FALSE
HP	H43-H45	Disorders of vitreous body and globe	Meta-analysis	12216	122	33	0.823417	0.109744	[0.66, 1.02]	0.0766577	0.177071	FALSE	FALSE
HP	H43-H45	Disorders of vitreous body and globe	FINRISK97	7452	47	4	0.95	0.1746	[0.67, 1.33]	0.749439	0.7843	FALSE	FALSE
HP	H43-H45	Disorders of vitreous body and globe	DILGOM07	4764	75	29	0.75	0.1411	[0.57, 0.99]	0.0439125	0.119279	FALSE	FALSE
HP	H43	Disorders of vitreous body	Meta-analysis	12216	117	30	0.82601	0.111864	[0.66, 1.03]	0.0874952	0.195821	FALSE	FALSE
HP	H43	Disorders of vitreous body	FINRISK97	7452	43	4	0.95	0.1831	[0.66, 1.36]	0.786185	0.796421	FALSE	FALSE
HP	H43	Disorders of vitreous body	DILGOM07	4764	74	26	0.76	0.1413	[0.57, 1.00]	0.0490468	0.124793	FALSE	FALSE
HP	H49-H52	Disorders of ocular muscles binocular movement accommodation and refraction	Meta-analysis	12216	93	65	1.09282	0.117008	[0.87, 1.37]	0.448106	0.484828	FALSE	FALSE
HP	H49-H52	Disorders of ocular muscles binocular movement accommodation and refraction	FINRISK97	7452	52	15	1.16	0.1598	[0.85, 1.59]	0.353356	0.589205	FALSE	FALSE
HP	H49-H52	Disorders of ocular muscles binocular movement accommodation and refraction	DILGOM07	4764	41	50	1.02	0.1718	[0.73, 1.43]	0.899885	0.551466	FALSE	FALSE
HP	H53-H54	Visual disturbances and blindness	Meta-analysis	12216	110	35	1.07668	0.10722	[0.87, 1.33]	0.490769	0.512042	FALSE	FALSE
HP	H53-H54	Visual disturbances and blindness	FINRISK97	7452	47	4	1.02	0.1651	[0.74, 1.41]	0.894984	0.800996	FALSE	FALSE
HP	H53-H54	Visual disturbances and blindness	DILGOM07	4764	63	31	1.12	0.141	[0.85, 1.48]	0.40438	0.360329	FALSE	FALSE
HP	H53	Visual disturbances	Meta-analysis	12216	99	30	1.12163	0.112074	[0.90, 1.40]	0.305762	0.396935	FALSE	FALSE
HP	H53	Visual disturbances	FINRISK97	7452	45	3	1.02	0.1682	[0.73, 1.42]	0.905731	0.800996	FALSE	FALSE
HP	H53	Visual disturbances	DILGOM07	4764	54	27	1.21	0.1503	[0.90, 1.62]	0.212756	0.285314	FALSE	FALSE
HP	H60-H62	Diseases of external ear	Meta-analysis	12216	70	28	1.07975	0.137555	[0.82, 1.41]	0.576971	0.573872	FALSE	FALSE
HP	H60-H62	Diseases of external ear	FINRISK97	7452	34	7	1.02	0.2064	[0.68, 1.52]	0.934758	0.812891	FALSE	FALSE
HP	H60-H62	Diseases of external ear	DILGOM07	4764	36	21	1.13	0.1845	[0.79, 1.63]	0.499721	0.39702	FALSE	FALSE
HP	H60	Otitis externa	Meta-analysis	12216	46	14	1.03013	0.173157	[0.73, 1.45]	0.863869	0.687918	FALSE	FALSE
HP	H60	Otitis externa	FINRISK97	7452	24	3	0.96	0.2494	[0.59, 1.57]	0.873395	0.800996	FALSE	FALSE
HP	H60	Otitis externa	DILGOM07	4764	22	11	1.1	0.2406	[0.69, 1.77]	0.678979	0.468415	FALSE	FALSE
HP	H65-H75	Diseases of middle ear and mastoid	Meta-analysis	12216	114	89	1.2135	0.106676	[0.98, 1.50]	0.0696803	0.169979	FALSE	FALSE
HP	H65-H75	Diseases of middle ear and mastoid	FINRISK97	7452	70	28	1.21	0.1324	[0.93, 1.56]	0.15486	0.41185	FALSE	FALSE
HP	H65-H75	Diseases of middle ear and mastoid	DILGOM07	4764	44	61	1.22	0.1801	[0.86, 1.73]	0.274773	0.310151	FALSE	FALSE
HP	H66	Suppurative and unspecified otitis media	Meta-analysis	12216	60	27	1.23666	0.148086	[0.93, 1.65]	0.151466	0.272772	FALSE	FALSE
HP	H66	Suppurative and unspecified otitis media	FINRISK97	7452	38	12	1.24	0.1814	[0.87, 1.78]	0.228448	0.499888	FALSE	FALSE
HP	H66	Suppurative and unspecified otitis media	DILGOM07	4764	22	15	1.23	0.2564	[0.75, 2.04]	0.416703	0.36417	FALSE	FALSE
HP	H80-H83	Diseases of inner ear	Meta-analysis	12216	208	111	0.958934	0.0839816	[0.81, 1.13]	0.617562	0.587925	FALSE	FALSE
HP	H80-H83	Diseases of inner ear	FINRISK97	7452	114	28	0.94	0.1163	[0.75, 1.18]	0.609529	0.721577	FALSE	FALSE
HP	H80-H83	Diseases of inner ear	DILGOM07	4764	94	83	0.98	0.1214	[0.77, 1.24]	0.85098	0.534534	FALSE	FALSE
HP	H81	Disorders of vestibular function	Meta-analysis	12216	161	65	0.906869	0.0964046	[0.75, 1.10]	0.310567	0.396935	FALSE	FALSE
HP	H81	Disorders of vestibular function	FINRISK97	7452	88	10	0.86	0.134	[0.66, 1.12]	0.257888	0.51204	FALSE	FALSE
HP	H81	Disorders of vestibular function	DILGOM07	4764	73	55	0.96	0.1388	[0.73, 1.26]	0.782817	0.503043	FALSE	FALSE
HP	H90-H95	Other disorders of ear	Meta-analysis	12216	599	204	0.962991	0.0482976	[0.88, 1.06]	0.43492	0.476256	FALSE	FALSE
HP	H90-H95	Other disorders of ear	FINRISK97	7452	303	13	0.84	0.0715	[0.73, 0.97]	0.0164068	0.11324	FALSE	FALSE
HP	H90-H95	Other disorders of ear	DILGOM07	4764	296	191	1.08	0.0655	[0.95, 1.23]	0.216828	0.285314	FALSE	FALSE
HP	H90-H95	Other disorders of ear	Training	614	30	<10	0.9	0.236969	[0.58, 1.42]	0.656596	0.639043	FALSE	FALSE
HP	H90-H95	Other disorders of ear	Immunoassayed	626	30	<10	0.9	0.200456	[0.61, 1.33]	0.599163	0.248595	FALSE	FALSE
HP	H90	Conductive and sensorineural hearing loss	Meta-analysis	12216	486	155	0.956841	0.0538009	[0.86, 1.06]	0.412203	0.468298	FALSE	FALSE
HP	H90	Conductive and sensorineural hearing loss	FINRISK97	7452	238	4	0.83	0.0811	[0.71, 0.98]	0.0261978	0.140965	FALSE	FALSE
HP	H90	Conductive and sensorineural hearing loss	DILGOM07	4764	248	151	1.07	0.0719	[0.93, 1.23]	0.355546	0.343588	FALSE	FALSE
HP	H90	Conductive and sensorineural hearing loss	Training	614	23	<10	0.95	0.263158	[0.56, 1.61]	0.84546	0.672528	FALSE	FALSE
HP	H90	Conductive and sensorineural hearing loss	Immunoassayed	626	23	<10	0.79	0.214403	[0.52, 1.20]	0.271577	0.180751	FALSE	FALSE
HP	H91	Other hearing loss	Meta-analysis	12216	78	33	1.18583	0.130371	[0.92, 1.53]	0.191092	0.310158	FALSE	FALSE
HP	H91	Other hearing loss	FINRISK97	7452	48	5	1.14	0.1636	[0.83, 1.57]	0.430793	0.660743	FALSE	FALSE
HP	H91	Other hearing loss	DILGOM07	4764	30	28	1.27	0.2158	[0.83, 1.95]	0.261016	0.310151	FALSE	FALSE
HP	H93	Other disorders of ear not elsewhere classified	Meta-analysis	12216	73	35	0.879601	0.138824	[0.67, 1.15]	0.355433	0.420628	FALSE	FALSE
HP	H93	Other disorders of ear not elsewhere classified	FINRISK97	7452	36	4	0.75	0.2037	[0.50, 1.11]	0.149673	0.405324	FALSE	FALSE
HP	H93	Other disorders of ear not elsewhere classified	DILGOM07	4764	37	31	1.01	0.1897	[0.70, 1.47]	0.945294	0.562155	FALSE	FALSE
HP	I10-I15	Hypertensive diseases	Meta-analysis	12216	972	378	1.12561	0.0367505	[1.05, 1.21]	0.00128368	0.00820335	TRUE	FALSE
HP	I10-I15	Hypertensive diseases	FINRISK97	7452	398	155	1.07	0.0602	[0.95, 1.21]	0.236522	0.507883	FALSE	FALSE
HP	I10-I15	Hypertensive diseases	DILGOM07	4764	574	223	1.16	0.0464	[1.06, 1.27]	0.00163288	0.0152583	TRUE	FALSE
HP	I10-I15	Hypertensive diseases	Training	614	59	<10	1.34	0.130577	[1.04, 1.72]	0.0250033	0.075793	FALSE	FALSE
HP	I10-I15	Hypertensive diseases	Immunoassayed	626	58	<10	1.35	0.161157	[0.98, 1.85]	0.0625761	0.0736977	FALSE	FALSE
HP	I10	Essential (primary) hypertension	Meta-analysis	12216	932	336	1.13024	0.0377285	[1.05, 1.22]	0.00117439	0.0078999	TRUE	FALSE
HP	I10	Essential (primary) hypertension	FINRISK97	7452	379	130	1.05	0.0621	[0.93, 1.19]	0.406688	0.630443	FALSE	FALSE
HP	I10	Essential (primary) hypertension	DILGOM07	4764	553	206	1.18	0.0475	[1.07, 1.29]	0.000574016	0.00887537	TRUE	FALSE
HP	I10	Essential (primary) hypertension	Training	614	56	<10	1.4	0.145796	[1.05, 1.85]	0.0210087	0.075793	FALSE	FALSE
HP	I10	Essential (primary) hypertension	Immunoassayed	626	55	<10	1.5	0.171719	[1.07, 2.09]	0.0182151	0.0398335	FALSE	FALSE
HP	I11	Hypertensive heart disease	Meta-analysis	12216	85	40	1.05739	0.129658	[0.82, 1.36]	0.66689	0.60856	FALSE	FALSE
HP	I11	Hypertensive heart disease	FINRISK97	7452	40	26	1.34	0.1802	[0.94, 1.90]	0.107334	0.331006	FALSE	FALSE
HP	I11	Hypertensive heart disease	DILGOM07	4764	45	14	0.82	0.1867	[0.57, 1.19]	0.297346	0.317915	FALSE	FALSE
HP	I20-I25	Ischaemic heart diseases	Meta-analysis	12216	914	497	1.20414	0.0379396	[1.12, 1.30]	9.76425e-07	2.77326e-05	TRUE	TRUE
HP	I20-I25	Ischaemic heart diseases	FINRISK97	7452	558	263	1.2	0.0496	[1.09, 1.33]	0.0001921	0.00506245	TRUE	TRUE
HP	I20-I25	Ischaemic heart diseases	DILGOM07	4764	356	234	1.21	0.0589	[1.08, 1.36]	0.00135845	0.0152583	TRUE	TRUE
HP	I20-I25	Ischaemic heart diseases	Training	614	31	<10	1.66	0.173541	[1.18, 2.34]	0.00349525	0.0262323	FALSE	TRUE
HP	I20-I25	Ischaemic heart diseases	Immunoassayed	626	30	<10	1.21	0.216732	[0.79, 1.86]	0.379119	0.197666	FALSE	TRUE
HP	I20	Angina pectoris	Meta-analysis	12216	509	324	1.2373	0.0512425	[1.12, 1.37]	3.24757e-05	0.000553427	TRUE	FALSE
HP	I20	Angina pectoris	FINRISK97	7452	339	161	1.23	0.0644	[1.09, 1.40]	0.00118024	0.022809	FALSE	FALSE
HP	I20	Angina pectoris	DILGOM07	4764	170	163	1.25	0.0846	[1.06, 1.48]	0.00779456	0.0377008	FALSE	FALSE
HP	I21	Acute myocardial infarction	Meta-analysis	12216	243	165	1.39912	0.0711618	[1.22, 1.61]	2.36496e-06	5.03775e-05	TRUE	FALSE
HP	I21	Acute myocardial infarction	FINRISK97	7452	153	96	1.42	0.0929	[1.19, 1.71]	0.000150453	0.00461777	TRUE	FALSE
HP	I21	Acute myocardial infarction	DILGOM07	4764	90	69	1.37	0.1107	[1.11, 1.71]	0.00409383	0.0242023	FALSE	FALSE
HP	I25	Chronic ischaemic heart disease	Meta-analysis	12216	668	263	1.21822	0.0451429	[1.12, 1.33]	1.22763e-05	0.00023669	TRUE	FALSE
HP	I25	Chronic ischaemic heart disease	FINRISK97	7452	378	125	1.27	0.0614	[1.13, 1.43]	9.08547e-05	0.00329218	TRUE	FALSE
HP	I25	Chronic ischaemic heart disease	DILGOM07	4764	290	138	1.16	0.0666	[1.02, 1.33]	0.0225378	0.0730678	FALSE	FALSE
HP	I25	Chronic ischaemic heart disease	Training	614	27	<10	1.74	0.191081	[1.20, 2.53]	0.00374726	0.0262323	FALSE	FALSE
HP	I25	Chronic ischaemic heart disease	Immunoassayed	626	26	<10	1.31	0.242866	[0.81, 2.13]	0.266208	0.180751	FALSE	FALSE
HP	I26-I28	Pulmonary heart disease and diseases of pulmonary circulation	Meta-analysis	12216	76	31	1.33356	0.124636	[1.04, 1.70]	0.0209134	0.0685368	FALSE	FALSE
HP	I26-I28	Pulmonary heart disease and diseases of pulmonary circulation	FINRISK97	7452	47	14	1.07	0.1742	[0.76, 1.50]	0.708684	0.763374	FALSE	FALSE
HP	I26-I28	Pulmonary heart disease and diseases of pulmonary circulation	DILGOM07	4764	29	17	1.68	0.1784	[1.19, 2.39]	0.00345372	0.0221481	FALSE	FALSE
HP	I26	Pulmonary embolism	Meta-analysis	12216	65	28	1.27031	0.135835	[0.97, 1.66]	0.0781649	0.178397	FALSE	FALSE
HP	I26	Pulmonary embolism	FINRISK97	7452	40	12	0.99	0.1921	[0.68, 1.45]	0.972125	0.820472	FALSE	FALSE
HP	I26	Pulmonary embolism	DILGOM07	4764	25	16	1.63	0.1921	[1.12, 2.38]	0.0107421	0.0469394	FALSE	FALSE
HP	I30-I52	Other forms of heart disease	Meta-analysis	12216	1002	453	1.0545	0.0375787	[0.98, 1.14]	0.157931	0.272772	FALSE	FALSE
HP	I30-I52	Other forms of heart disease	FINRISK97	7452	535	172	1.11	0.0527	[1.00, 1.23]	0.0514206	0.209944	FALSE	FALSE
HP	I30-I52	Other forms of heart disease	DILGOM07	4764	467	281	1	0.0536	[0.90, 1.11]	0.942382	0.562086	FALSE	FALSE
HP	I30-I52	Other forms of heart disease	Training	614	57	<10	1.29	0.144199	[0.97, 1.71]	0.0774106	0.15142	FALSE	FALSE
HP	I30-I52	Other forms of heart disease	Immunoassayed	626	56	<10	1.15	0.152467	[0.85, 1.55]	0.359316	0.197666	FALSE	FALSE
HP	I34	Nonrheumatic mitral valve disorders	Meta-analysis	12216	107	42	0.913112	0.115429	[0.73, 1.14]	0.431007	0.476256	FALSE	FALSE
HP	I34	Nonrheumatic mitral valve disorders	FINRISK97	7452	51	5	0.93	0.1738	[0.66, 1.30]	0.666363	0.754565	FALSE	FALSE
HP	I34	Nonrheumatic mitral valve disorders	DILGOM07	4764	56	37	0.9	0.1544	[0.66, 1.22]	0.486774	0.389816	FALSE	FALSE
HP	I35	Nonrheumatic aortic valve disorders	Meta-analysis	12216	152	45	0.880113	0.0987355	[0.73, 1.07]	0.195873	0.310158	FALSE	FALSE
HP	I35	Nonrheumatic aortic valve disorders	FINRISK97	7452	64	15	0.83	0.1639	[0.60, 1.14]	0.25198	0.51204	FALSE	FALSE
HP	I35	Nonrheumatic aortic valve disorders	DILGOM07	4764	88	30	0.91	0.1237	[0.72, 1.17]	0.468592	0.381332	FALSE	FALSE
HP	I42	Cardiomyopathy	Meta-analysis	12216	62	28	1.19789	0.138568	[0.91, 1.57]	0.192559	0.310158	FALSE	FALSE
HP	I42	Cardiomyopathy	FINRISK97	7452	30	10	1.4	0.209	[0.93, 2.11]	0.106914	0.331006	FALSE	FALSE
HP	I42	Cardiomyopathy	DILGOM07	4764	32	18	1.06	0.1851	[0.74, 1.53]	0.736276	0.485228	FALSE	FALSE
HP	I44	Atrioventricular and left bundle branch block	Meta-analysis	12216	57	16	1.0876	0.154548	[0.80, 1.47]	0.586881	0.578325	FALSE	FALSE
HP	I44	Atrioventricular and left bundle branch block	FINRISK97	7452	29	5	1.46	0.2163	[0.95, 2.22]	0.0824884	0.283941	FALSE	FALSE
HP	I44	Atrioventricular and left bundle branch block	DILGOM07	4764	28	11	0.8	0.2209	[0.52, 1.23]	0.300392	0.319472	FALSE	FALSE
HP	I48	Atrial fibrillation and flutter	Meta-analysis	12216	473	213	1.04113	0.0556281	[0.93, 1.16]	0.468724	0.501318	FALSE	FALSE
HP	I48	Atrial fibrillation and flutter	FINRISK97	7452	239	96	1.01	0.0808	[0.86, 1.18]	0.904986	0.800996	FALSE	FALSE
HP	I48	Atrial fibrillation and flutter	DILGOM07	4764	234	117	1.07	0.0767	[0.92, 1.25]	0.358956	0.345223	FALSE	FALSE
HP	I48	Atrial fibrillation and flutter	Training	614	32	<10	0.98	0.232349	[0.65, 1.48]	0.930711	0.679372	FALSE	FALSE
HP	I48	Atrial fibrillation and flutter	Immunoassayed	626	31	<10	0.84	0.193	[0.58, 1.22]	0.366322	0.197666	FALSE	FALSE
HP	I49	Other cardiac arrhythmias	Meta-analysis	12216	231	140	0.889056	0.0790152	[0.76, 1.04]	0.136682	0.2594	FALSE	FALSE
HP	I49	Other cardiac arrhythmias	FINRISK97	7452	117	43	1.03	0.1124	[0.82, 1.28]	0.816756	0.799883	FALSE	FALSE
HP	I49	Other cardiac arrhythmias	DILGOM07	4764	114	97	0.77	0.1111	[0.62, 0.95]	0.0173596	0.0634427	FALSE	FALSE
HP	I50	Heart failure	Meta-analysis	12216	192	35	1.59094	0.0767097	[1.37, 1.85]	1.42144e-09	7.26698e-08	TRUE	TRUE
HP	I50	Heart failure	FINRISK97	7452	112	12	1.61	0.1057	[1.31, 1.98]	7.26615e-06	0.00042127	TRUE	TRUE
HP	I50	Heart failure	DILGOM07	4764	80	23	1.57	0.1115	[1.27, 1.96]	4.60831e-05	0.00115786	TRUE	TRUE
HP	I60-I69	Cerebrovascular diseases	Meta-analysis	12216	402	174	1.20573	0.0562047	[1.08, 1.35]	0.000872872	0.00656245	TRUE	FALSE
HP	I60-I69	Cerebrovascular diseases	FINRISK97	7452	236	81	1.15	0.0777	[0.99, 1.34]	0.0637612	0.240044	FALSE	FALSE
HP	I60-I69	Cerebrovascular diseases	DILGOM07	4764	166	93	1.27	0.0814	[1.08, 1.48]	0.00377941	0.0230205	FALSE	FALSE
HP	I63	Cerebral infarction	Meta-analysis	12216	269	47	1.29092	0.0689044	[1.13, 1.48]	0.000210627	0.00211052	TRUE	FALSE
HP	I63	Cerebral infarction	FINRISK97	7452	174	8	1.26	0.0885	[1.06, 1.50]	0.00924016	0.0787819	FALSE	FALSE
HP	I63	Cerebral infarction	DILGOM07	4764	95	39	1.34	0.1098	[1.08, 1.66]	0.00797384	0.0377008	FALSE	FALSE
HP	I67	Other cerebrovascular diseases	Meta-analysis	12216	52	33	0.811363	0.168687	[0.58, 1.13]	0.215266	0.325599	FALSE	FALSE
HP	I67	Other cerebrovascular diseases	FINRISK97	7452	25	13	0.8	0.2576	[0.48, 1.32]	0.378851	0.61013	FALSE	FALSE
HP	I67	Other cerebrovascular diseases	DILGOM07	4764	27	20	0.82	0.2232	[0.53, 1.27]	0.381707	0.357983	FALSE	FALSE
HP	I69	Sequelae of cerebrovascular disease	Meta-analysis	12216	134	45	1.05304	0.103027	[0.86, 1.29]	0.615946	0.587925	FALSE	FALSE
HP	I69	Sequelae of cerebrovascular disease	FINRISK97	7452	82	17	1.1	0.1346	[0.84, 1.43]	0.482645	0.690144	FALSE	FALSE
HP	I69	Sequelae of cerebrovascular disease	DILGOM07	4764	52	28	0.99	0.1601	[0.73, 1.36]	0.973282	0.568703	FALSE	FALSE
HP	I70-I79	Diseases of arteries, arterioles and capillarie	Meta-analysis	12216	263	104	1.48659	0.0653686	[1.31, 1.69]	1.31671e-09	7.26698e-08	TRUE	TRUE
HP	I70-I79	Diseases of arteries, arterioles and capillarie	FINRISK97	7452	151	54	1.61	0.0919	[1.34, 1.92]	2.64499e-07	3.83371e-05	TRUE	TRUE
HP	I70-I79	Diseases of arteries, arterioles and capillarie	DILGOM07	4764	112	50	1.37	0.093	[1.14, 1.65]	0.000679663	0.00910768	TRUE	TRUE
HP	I70-I79	Diseases of arteries, arterioles and capillarie	Training	614	23	<10	1.52	0.190943	[1.05, 2.22]	0.0283182	0.075793	FALSE	TRUE
HP	I70-I79	Diseases of arteries, arterioles and capillarie	Immunoassayed	626	22	<10	1.4	0.246632	[0.86, 2.28]	0.172483	0.138966	FALSE	TRUE
HP	I70	Atherosclerosis	Meta-analysis	12216	173	64	1.66563	0.0777505	[1.43, 1.94]	5.30686e-11	6.78269e-09	TRUE	TRUE
HP	I70	Atherosclerosis	FINRISK97	7452	111	35	1.69	0.1082	[1.37, 2.09]	1.22424e-06	0.000118297	TRUE	TRUE
HP	I70	Atherosclerosis	DILGOM07	4764	62	29	1.64	0.1118	[1.32, 2.04]	1.01312e-05	0.000438486	TRUE	TRUE
HP	I80-I89	Diseases of veins lymphatic vessels and lymph nodes not elsewhere classified	Meta-analysis	12216	715	839	1.0426	0.0441174	[0.96, 1.14]	0.344381	0.41911	FALSE	FALSE
HP	I80-I89	Diseases of veins lymphatic vessels and lymph nodes not elsewhere classified	FINRISK97	7452	424	391	1.03	0.0581	[0.92, 1.16]	0.560388	0.717393	FALSE	FALSE
HP	I80-I89	Diseases of veins lymphatic vessels and lymph nodes not elsewhere classified	DILGOM07	4764	291	448	1.06	0.0678	[0.92, 1.21]	0.427611	0.366802	FALSE	FALSE
HP	I80-I89	Diseases of veins lymphatic vessels and lymph nodes not elsewhere classified	Training	614	39	<10	1.11	0.187536	[0.77, 1.59]	0.577883	0.59872	FALSE	FALSE
HP	I80-I89	Diseases of veins lymphatic vessels and lymph nodes not elsewhere classified	Immunoassayed	626	38	<10	0.86	0.17385	[0.61, 1.21]	0.385642	0.197666	FALSE	FALSE
HP	I80	Phlebitis and thrombophlebitis	Meta-analysis	12216	121	85	1.31768	0.101335	[1.08, 1.61]	0.00648184	0.026497	FALSE	FALSE
HP	I80	Phlebitis and thrombophlebitis	FINRISK97	7452	72	39	1.3	0.1361	[1.00, 1.70]	0.0507868	0.209944	FALSE	FALSE
HP	I80	Phlebitis and thrombophlebitis	DILGOM07	4764	49	46	1.34	0.1518	[1.00, 1.81]	0.0527094	0.1308	FALSE	FALSE
HP	I83	Varicose veins of lower extremities	Meta-analysis	12216	265	481	0.879382	0.075369	[0.76, 1.02]	0.0881157	0.195821	FALSE	FALSE
HP	I83	Varicose veins of lower extremities	FINRISK97	7452	187	238	0.91	0.0897	[0.76, 1.08]	0.274003	0.526023	FALSE	FALSE
HP	I83	Varicose veins of lower extremities	DILGOM07	4764	78	243	0.81	0.139	[0.62, 1.06]	0.12814	0.220142	FALSE	FALSE
HP	I84	Haemorrhoids	Meta-analysis	12216	246	252	1.11032	0.0751071	[0.96, 1.29]	0.16353	0.278935	FALSE	FALSE
HP	I84	Haemorrhoids	FINRISK97	7452	138	100	1.03	0.1028	[0.84, 1.26]	0.788751	0.796421	FALSE	FALSE
HP	I84	Haemorrhoids	DILGOM07	4764	108	152	1.21	0.11	[0.97, 1.50]	0.0877216	0.174578	FALSE	FALSE
HP	I87	Other disorders of veins	Meta-analysis	12216	111	27	0.823056	0.117655	[0.65, 1.04]	0.0979042	0.210265	FALSE	FALSE
HP	I87	Other disorders of veins	FINRISK97	7452	37	2	0.77	0.2061	[0.51, 1.15]	0.198709	0.468316	FALSE	FALSE
HP	I87	Other disorders of veins	DILGOM07	4764	74	25	0.85	0.1433	[0.64, 1.12]	0.245995	0.305223	FALSE	FALSE
HP	J00-J06	Acute respiratory infections	Meta-analysis	12216	254	432	1.17778	0.0701574	[1.03, 1.35]	0.0196829	0.0671785	FALSE	FALSE
HP	J00-J06	Acute respiratory infections	FINRISK97	7452	156	158	1.17	0.0899	[0.98, 1.40]	0.077819	0.278501	FALSE	FALSE
HP	J00-J06	Acute respiratory infections	DILGOM07	4764	98	274	1.19	0.1122	[0.95, 1.48]	0.124726	0.217622	FALSE	FALSE
HP	J01	Acute sinusitis	Meta-analysis	12216	124	144	1.29392	0.0975235	[1.07, 1.57]	0.00823728	0.032394	FALSE	FALSE
HP	J01	Acute sinusitis	FINRISK97	7452	79	43	1.28	0.1211	[1.01, 1.63]	0.0400212	0.178485	FALSE	FALSE
HP	J01	Acute sinusitis	DILGOM07	4764	45	101	1.32	0.1645	[0.95, 1.82]	0.0957101	0.186544	FALSE	FALSE
HP	J06	Acute upper respiratory infections of multiple and unspecified sites	Meta-analysis	12216	97	153	0.943397	0.119876	[0.75, 1.19]	0.626919	0.589165	FALSE	FALSE
HP	J06	Acute upper respiratory infections of multiple and unspecified sites	FINRISK97	7452	56	50	0.98	0.1612	[0.71, 1.34]	0.876996	0.800996	FALSE	FALSE
HP	J06	Acute upper respiratory infections of multiple and unspecified sites	DILGOM07	4764	41	103	0.9	0.1793	[0.63, 1.28]	0.552564	0.418309	FALSE	FALSE
HP	J10-J18	Influenza and pneumonia	Meta-analysis	12216	447	243	1.31485	0.0516381	[1.19, 1.45]	1.15337e-07	4.91373e-06	TRUE	TRUE
HP	J10-J18	Influenza and pneumonia	FINRISK97	7452	245	91	1.31	0.072	[1.14, 1.51]	0.000159297	0.00461777	TRUE	TRUE
HP	J10-J18	Influenza and pneumonia	DILGOM07	4764	202	152	1.32	0.0741	[1.14, 1.52]	0.000211679	0.00425485	TRUE	TRUE
HP	J10-J18	Influenza and pneumonia	Training	614	21	<10	1.44	0.20378	[0.97, 2.14]	0.073551	0.15142	FALSE	TRUE
HP	J10-J18	Influenza and pneumonia	Immunoassayed	626	21	<10	1.63	0.267131	[0.97, 2.75]	0.0674011	0.0736977	FALSE	TRUE
HP	J15	Bacterial pneumonia not elsewhere classified	Meta-analysis	12216	204	68	1.26329	0.0772869	[1.09, 1.47]	0.0024943	0.0132832	TRUE	FALSE
HP	J15	Bacterial pneumonia not elsewhere classified	FINRISK97	7452	144	16	1.26	0.0944	[1.05, 1.52]	0.0138282	0.0977707	FALSE	FALSE
HP	J15	Bacterial pneumonia not elsewhere classified	DILGOM07	4764	60	52	1.27	0.1346	[0.97, 1.65]	0.0802431	0.16628	FALSE	FALSE
HP	J18	Pneumonia, unspecified organism	Meta-analysis	12216	311	155	1.25282	0.061916	[1.11, 1.41]	0.000272294	0.00257792	TRUE	FALSE
HP	J18	Pneumonia, unspecified organism	FINRISK97	7452	142	66	1.23	0.0949	[1.02, 1.48]	0.0318624	0.16141	FALSE	FALSE
HP	J18	Pneumonia, unspecified organism	DILGOM07	4764	169	89	1.27	0.0817	[1.09, 1.50]	0.00296588	0.0221481	FALSE	FALSE
HP	J20-J22	Other acute lower respiratory infections	Meta-analysis	12216	90	58	1.42917	0.114643	[1.14, 1.79]	0.00184037	0.0106917	TRUE	FALSE
HP	J20-J22	Other acute lower respiratory infections	FINRISK97	7452	53	23	1.47	0.154	[1.09, 1.99]	0.0123177	0.0962206	FALSE	FALSE
HP	J20-J22	Other acute lower respiratory infections	DILGOM07	4764	37	35	1.38	0.1717	[0.98, 1.93]	0.0632414	0.144452	FALSE	FALSE
HP	J20	Acute bronchitis	Meta-analysis	12216	78	56	1.3226	0.126959	[1.03, 1.70]	0.0276472	0.0872489	FALSE	FALSE
HP	J20	Acute bronchitis	FINRISK97	7452	45	23	1.49	0.1683	[1.07, 2.07]	0.0174899	0.11548	FALSE	FALSE
HP	J20	Acute bronchitis	DILGOM07	4764	33	33	1.13	0.1934	[0.77, 1.65]	0.525118	0.406281	FALSE	FALSE
HP	J30-J39	Other diseases of upper respiratory tract	Meta-analysis	12216	586	656	1.06322	0.0484351	[0.97, 1.17]	0.205659	0.314793	FALSE	FALSE
HP	J30-J39	Other diseases of upper respiratory tract	FINRISK97	7452	365	258	1.04	0.0622	[0.92, 1.18]	0.509071	0.692827	FALSE	FALSE
HP	J30-J39	Other diseases of upper respiratory tract	DILGOM07	4764	221	398	1.1	0.0772	[0.95, 1.28]	0.215644	0.285314	FALSE	FALSE
HP	J30-J39	Other diseases of upper respiratory tract	Training	614	29	<10	1.72	0.195374	[1.17, 2.53]	0.00550606	0.0294737	FALSE	FALSE
HP	J30-J39	Other diseases of upper respiratory tract	Immunoassayed	626	30	<10	1.35	0.210744	[0.89, 2.05]	0.15444	0.13432	FALSE	FALSE
HP	J30	Vasomotor and allergic rhinitis	Meta-analysis	12216	102	75	1.06732	0.111835	[0.86, 1.33]	0.560203	0.566004	FALSE	FALSE
HP	J30	Vasomotor and allergic rhinitis	FINRISK97	7452	63	23	0.96	0.1461	[0.72, 1.28]	0.790825	0.796421	FALSE	FALSE
HP	J30	Vasomotor and allergic rhinitis	DILGOM07	4764	39	52	1.24	0.1738	[0.88, 1.74]	0.221996	0.289754	FALSE	FALSE
HP	J31	Chronic rhinitis nasopharyngitis and pharyngitis	Meta-analysis	12216	83	41	0.785295	0.135368	[0.60, 1.02]	0.0741842	0.173972	FALSE	FALSE
HP	J31	Chronic rhinitis nasopharyngitis and pharyngitis	FINRISK97	7452	43	9	0.8	0.1887	[0.55, 1.15]	0.22935	0.499888	FALSE	FALSE
HP	J31	Chronic rhinitis nasopharyngitis and pharyngitis	DILGOM07	4764	40	32	0.77	0.1943	[0.53, 1.12]	0.17567	0.25774	FALSE	FALSE
HP	J32	Chronic sinusitis	Meta-analysis	12216	114	108	1.17	0.10965	[0.94, 1.45]	0.152183	0.272772	FALSE	FALSE
HP	J32	Chronic sinusitis	FINRISK97	7452	75	42	1.17	0.1363	[0.90, 1.53]	0.24832	0.51204	FALSE	FALSE
HP	J32	Chronic sinusitis	DILGOM07	4764	39	66	1.17	0.1846	[0.81, 1.68]	0.3988	0.359465	FALSE	FALSE
HP	J33	Nasal polyp	Meta-analysis	12216	68	44	1.14844	0.138998	[0.87, 1.51]	0.319375	0.404151	FALSE	FALSE
HP	J33	Nasal polyp	FINRISK97	7452	47	17	1.24	0.1661	[0.90, 1.72]	0.187914	0.453946	FALSE	FALSE
HP	J33	Nasal polyp	DILGOM07	4764	21	27	0.96	0.2539	[0.58, 1.58]	0.872573	0.542279	FALSE	FALSE
HP	J34	Other disorders of nose and nasal sinuses	Meta-analysis	12216	148	142	0.95	0.098086	[0.78, 1.15]	0.601015	0.580552	FALSE	FALSE
HP	J34	Other disorders of nose and nasal sinuses	FINRISK97	7452	93	49	0.95	0.1232	[0.75, 1.21]	0.700725	0.760786	FALSE	FALSE
HP	J34	Other disorders of nose and nasal sinuses	DILGOM07	4764	55	93	0.95	0.1621	[0.69, 1.31]	0.772602	0.499345	FALSE	FALSE
HP	J35	Chronic diseases of tonsils and adenoids	Meta-analysis	12216	77	202	1.0397	0.133976	[0.80, 1.35]	0.771372	0.654861	FALSE	FALSE
HP	J35	Chronic diseases of tonsils and adenoids	FINRISK97	7452	49	81	0.93	0.1712	[0.67, 1.31]	0.693591	0.75668	FALSE	FALSE
HP	J35	Chronic diseases of tonsils and adenoids	DILGOM07	4764	28	121	1.24	0.2152	[0.81, 1.89]	0.323382	0.328289	FALSE	FALSE
HP	J38	Diseases of vocal cords and larynx not elsewhere classified	Meta-analysis	12216	55	51	1.22531	0.157767	[0.90, 1.67]	0.197778	0.310158	FALSE	FALSE
HP	J38	Diseases of vocal cords and larynx not elsewhere classified	FINRISK97	7452	29	20	1.23	0.2164	[0.80, 1.87]	0.348438	0.589205	FALSE	FALSE
HP	J38	Diseases of vocal cords and larynx not elsewhere classified	DILGOM07	4764	26	31	1.22	0.2305	[0.78, 1.91]	0.390577	0.357983	FALSE	FALSE
HP	J40-J47	Chronic lower respiratory diseases	Meta-analysis	12216	596	364	1.36377	0.0459179	[1.25, 1.49]	1.41233e-11	3.6102e-09	TRUE	TRUE
HP	J40-J47	Chronic lower respiratory diseases	FINRISK97	7452	387	170	1.3	0.057	[1.16, 1.45]	4.11093e-06	0.000297924	TRUE	TRUE
HP	J40-J47	Chronic lower respiratory diseases	DILGOM07	4764	209	194	1.49	0.0775	[1.28, 1.74]	2.33907e-07	4.70164e-05	TRUE	TRUE
HP	J40-J47	Chronic lower respiratory diseases	Training	614	23	<10	1.99	0.19843	[1.35, 2.94]	0.000524545	0.0168472	FALSE	TRUE
HP	J40-J47	Chronic lower respiratory diseases	Immunoassayed	626	23	<10	2.69	0.287467	[1.53, 4.72]	0.000576847	0.00883031	TRUE	TRUE
HP	J44	Other chronic obstructive pulmonary disease	Meta-analysis	12216	182	50	1.53415	0.0836309	[1.30, 1.81]	3.09659e-07	1.13078e-05	TRUE	TRUE
HP	J44	Other chronic obstructive pulmonary disease	FINRISK97	7452	126	27	1.45	0.1022	[1.19, 1.78]	0.000256687	0.00572383	TRUE	TRUE
HP	J44	Other chronic obstructive pulmonary disease	DILGOM07	4764	56	23	1.72	0.1455	[1.29, 2.29]	0.000199595	0.00425485	TRUE	TRUE
HP	J45	Asthma	Meta-analysis	12216	443	298	1.23554	0.0543222	[1.11, 1.37]	9.87782e-05	0.00120236	TRUE	FALSE
HP	J45	Asthma	FINRISK97	7452	279	133	1.12	0.069	[0.98, 1.29]	0.0910298	0.296496	FALSE	FALSE
HP	J45	Asthma	DILGOM07	4764	164	165	1.45	0.0881	[1.22, 1.72]	2.39778e-05	0.000688519	TRUE	FALSE
HP	J90-J94	Other diseases of pleura	Meta-analysis	12216	82	48	1.42033	0.116921	[1.13, 1.79]	0.00269042	0.0140035	TRUE	FALSE
HP	J90-J94	Other diseases of pleura	FINRISK97	7452	56	27	1.4	0.1443	[1.06, 1.86]	0.0197406	0.121755	FALSE	FALSE
HP	J90-J94	Other diseases of pleura	DILGOM07	4764	26	21	1.46	0.1995	[0.99, 2.16]	0.0570922	0.138262	FALSE	FALSE
HP	K00-K14	Diseases of oral cavity salivary glands and jaws	Meta-analysis	12216	321	197	1.13738	0.062415	[1.01, 1.29]	0.0391591	0.116393	FALSE	FALSE
HP	K00-K14	Diseases of oral cavity salivary glands and jaws	FINRISK97	7452	176	34	1.17	0.0848	[0.99, 1.38]	0.0665651	0.244256	FALSE	FALSE
HP	K00-K14	Diseases of oral cavity salivary glands and jaws	DILGOM07	4764	145	163	1.1	0.0922	[0.92, 1.32]	0.304967	0.321446	FALSE	FALSE
HP	K02	Dental caries	Meta-analysis	12216	48	20	1.30741	0.157924	[0.96, 1.78]	0.0896359	0.195835	FALSE	FALSE
HP	K02	Dental caries	FINRISK97	7452	26	4	1.22	0.2186	[0.80, 1.88]	0.356075	0.589205	FALSE	FALSE
HP	K02	Dental caries	DILGOM07	4764	22	16	1.41	0.2284	[0.90, 2.21]	0.130514	0.222321	FALSE	FALSE
HP	K04	Diseases of pulp and periapical tissues	Meta-analysis	12216	79	36	1.46966	0.119203	[1.16, 1.86]	0.00123776	0.00811271	TRUE	FALSE
HP	K04	Diseases of pulp and periapical tissues	FINRISK97	7452	42	9	1.61	0.1621	[1.17, 2.21]	0.00348422	0.0439141	FALSE	FALSE
HP	K04	Diseases of pulp and periapical tissues	DILGOM07	4764	37	27	1.32	0.1759	[0.94, 1.87]	0.111073	0.203875	FALSE	FALSE
HP	K07	Dentofacial anomalies [including malocclusion]	Meta-analysis	12216	84	41	0.862181	0.133207	[0.66, 1.12]	0.265608	0.377193	FALSE	FALSE
HP	K07	Dentofacial anomalies [including malocclusion]	FINRISK97	7452	49	2	0.87	0.1703	[0.63, 1.22]	0.426556	0.657725	FALSE	FALSE
HP	K07	Dentofacial anomalies [including malocclusion]	DILGOM07	4764	35	39	0.85	0.2138	[0.56, 1.29]	0.435991	0.369773	FALSE	FALSE
HP	K08	Other disorders of teeth and supporting structures	Meta-analysis	12216	49	19	1.25686	0.161152	[0.92, 1.72]	0.156002	0.272772	FALSE	FALSE
HP	K08	Other disorders of teeth and supporting structures	FINRISK97	7452	24	3	1.02	0.2405	[0.63, 1.63]	0.946669	0.812891	FALSE	FALSE
HP	K08	Other disorders of teeth and supporting structures	DILGOM07	4764	25	16	1.49	0.2171	[0.97, 2.28]	0.0663304	0.149806	FALSE	FALSE
HP	K11	Diseases of salivary glands	Meta-analysis	12216	51	27	1.11469	0.157189	[0.82, 1.52]	0.489738	0.512042	FALSE	FALSE
HP	K11	Diseases of salivary glands	FINRISK97	7452	27	3	0.97	0.2226	[0.63, 1.50]	0.900169	0.800996	FALSE	FALSE
HP	K11	Diseases of salivary glands	DILGOM07	4764	24	24	1.28	0.222	[0.83, 1.98]	0.261654	0.310151	FALSE	FALSE
HP	K20-K31	Diseases of oesophagus stomach and duodenum	Meta-analysis	12216	576	355	1.21129	0.0471276	[1.10, 1.33]	4.75279e-05	0.00071465	TRUE	FALSE
HP	K20-K31	Diseases of oesophagus stomach and duodenum	FINRISK97	7452	332	96	1.22	0.0626	[1.08, 1.38]	0.00158971	0.0288021	FALSE	FALSE
HP	K20-K31	Diseases of oesophagus stomach and duodenum	DILGOM07	4764	244	259	1.2	0.0716	[1.04, 1.38]	0.0101888	0.0465453	FALSE	FALSE
HP	K20-K31	Diseases of oesophagus stomach and duodenum	Training	614	25	<10	1.08	0.248731	[0.68, 1.70]	0.757006	0.672528	FALSE	FALSE
HP	K20-K31	Diseases of oesophagus stomach and duodenum	Immunoassayed	626	26	<10	1.2	0.23092	[0.77, 1.87]	0.429793	0.212233	FALSE	FALSE
HP	K21	Gastro oesophageal reflux disease	Meta-analysis	12216	257	120	1.21439	0.0707703	[1.06, 1.40]	0.00605741	0.0262439	FALSE	FALSE
HP	K21	Gastro oesophageal reflux disease	FINRISK97	7452	141	3	1.28	0.0958	[1.06, 1.54]	0.00994722	0.0823871	FALSE	FALSE
HP	K21	Gastro oesophageal reflux disease	DILGOM07	4764	116	117	1.14	0.105	[0.93, 1.40]	0.217174	0.285314	FALSE	FALSE
HP	K22	Other diseases of oesophagus	Meta-analysis	12216	52	39	1.52834	0.155168	[1.13, 2.07]	0.00626286	0.026497	FALSE	FALSE
HP	K22	Other diseases of oesophagus	FINRISK97	7452	29	14	1.79	0.1982	[1.21, 2.64]	0.00334585	0.0439141	FALSE	FALSE
HP	K22	Other diseases of oesophagus	DILGOM07	4764	23	25	1.19	0.2494	[0.73, 1.95]	0.47718	0.383661	FALSE	FALSE
HP	K29	Gastritis and duodenitis	Meta-analysis	12216	193	122	1.17182	0.0807369	[1.00, 1.37]	0.0495446	0.140717	FALSE	FALSE
HP	K29	Gastritis and duodenitis	FINRISK97	7452	115	38	1.1	0.1079	[0.89, 1.35]	0.392326	0.621472	FALSE	FALSE
HP	K29	Gastritis and duodenitis	DILGOM07	4764	78	84	1.27	0.1217	[1.00, 1.62]	0.0476708	0.124442	FALSE	FALSE
HP	K30	Dyspepsia	Meta-analysis	12216	69	23	1.03875	0.141415	[0.79, 1.37]	0.788046	0.662564	FALSE	FALSE
HP	K30	Dyspepsia	FINRISK97	7452	33	1	0.96	0.2092	[0.64, 1.45]	0.856854	0.800996	FALSE	FALSE
HP	K30	Dyspepsia	DILGOM07	4764	36	22	1.11	0.1919	[0.76, 1.62]	0.586474	0.426947	FALSE	FALSE
HP	K35-K38	Diseases of appendix	Meta-analysis	12216	113	284	1.00375	0.113105	[0.80, 1.25]	0.973617	0.722313	FALSE	FALSE
HP	K35-K38	Diseases of appendix	FINRISK97	7452	69	128	1.02	0.1462	[0.77, 1.36]	0.886036	0.800996	FALSE	FALSE
HP	K35-K38	Diseases of appendix	DILGOM07	4764	44	156	0.98	0.1785	[0.69, 1.40]	0.928163	0.559963	FALSE	FALSE
HP	K35	Acute appendicitis	Meta-analysis	12216	112	268	1.00369	0.113361	[0.80, 1.25]	0.974063	0.722313	FALSE	FALSE
HP	K35	Acute appendicitis	FINRISK97	7452	68	118	1.02	0.1467	[0.77, 1.37]	0.869913	0.800996	FALSE	FALSE
HP	K35	Acute appendicitis	DILGOM07	4764	44	150	0.98	0.1786	[0.69, 1.40]	0.926105	0.559963	FALSE	FALSE
HP	K40-K46	Hernia	Meta-analysis	12216	539	544	1.11228	0.0495879	[1.01, 1.23]	0.031879	0.0981795	FALSE	FALSE
HP	K40-K46	Hernia	FINRISK97	7452	323	232	1.1	0.0647	[0.97, 1.25]	0.132395	0.380556	FALSE	FALSE
HP	K40-K46	Hernia	DILGOM07	4764	216	312	1.13	0.0772	[0.97, 1.32]	0.102863	0.195465	FALSE	FALSE
HP	K40-K46	Hernia	Training	614	31	<10	1.24	0.205043	[0.83, 1.86]	0.29413	0.378123	FALSE	FALSE
HP	K40-K46	Hernia	Immunoassayed	626	31	<10	1.16	0.194417	[0.79, 1.72]	0.445218	0.21298	FALSE	FALSE
HP	K40	Inguinal hernia	Meta-analysis	12216	339	421	0.998872	0.0637071	[0.88, 1.13]	0.985865	0.724464	FALSE	FALSE
HP	K40	Inguinal hernia	FINRISK97	7452	219	189	1.01	0.0801	[0.87, 1.19]	0.855782	0.800996	FALSE	FALSE
HP	K40	Inguinal hernia	DILGOM07	4764	120	232	0.98	0.1051	[0.80, 1.21]	0.883734	0.545239	FALSE	FALSE
HP	K42	Umbilical hernia	Meta-analysis	12216	75	44	0.96926	0.141556	[0.73, 1.28]	0.82543	0.670096	FALSE	FALSE
HP	K42	Umbilical hernia	FINRISK97	7452	39	18	0.92	0.2013	[0.62, 1.37]	0.694108	0.75668	FALSE	FALSE
HP	K42	Umbilical hernia	DILGOM07	4764	36	26	1.02	0.1991	[0.69, 1.51]	0.91472	0.55716	FALSE	FALSE
HP	K43	Ventral hernia	Meta-analysis	12216	61	38	1.53088	0.151099	[1.14, 2.06]	0.00482797	0.0216513	FALSE	FALSE
HP	K43	Ventral hernia	FINRISK97	7452	33	11	1.84	0.2017	[1.24, 2.73]	0.0024801	0.0367905	FALSE	FALSE
HP	K43	Ventral hernia	DILGOM07	4764	28	27	1.21	0.2281	[0.77, 1.89]	0.405998	0.360329	FALSE	FALSE
HP	K44	Diaphragmatic hernia	Meta-analysis	12216	88	40	1.48613	0.11324	[1.19, 1.86]	0.000467786	0.00402498	TRUE	FALSE
HP	K44	Diaphragmatic hernia	FINRISK97	7452	45	1	1.37	0.1608	[1.00, 1.88]	0.048629	0.207306	FALSE	FALSE
HP	K44	Diaphragmatic hernia	DILGOM07	4764	43	39	1.61	0.1595	[1.17, 2.19]	0.00300651	0.0221481	FALSE	FALSE
HP	K50-K52	Non-infective enteritis and colitis	Meta-analysis	12216	134	79	1.49505	0.0983896	[1.23, 1.81]	4.36255e-05	0.000696971	TRUE	FALSE
HP	K50-K52	Non-infective enteritis and colitis	FINRISK97	7452	70	25	1.49	0.1399	[1.13, 1.95]	0.00468398	0.0508406	FALSE	FALSE
HP	K50-K52	Non-infective enteritis and colitis	DILGOM07	4764	64	54	1.5	0.1384	[1.14, 1.97]	0.00348769	0.0221481	FALSE	FALSE
HP	K51	Ulcerative colitis	Meta-analysis	12216	77	49	1.49536	0.131834	[1.15, 1.94]	0.0022727	0.0123606	TRUE	FALSE
HP	K51	Ulcerative colitis	FINRISK97	7452	36	13	1.48	0.1892	[1.02, 2.14]	0.0398747	0.178485	FALSE	FALSE
HP	K51	Ulcerative colitis	DILGOM07	4764	41	36	1.51	0.1838	[1.05, 2.16]	0.0251461	0.0777612	FALSE	FALSE
HP	K55-K63	Other diseases of intestines	Meta-analysis	12216	589	327	1.22493	0.046525	[1.12, 1.34]	1.29633e-05	0.00023669	TRUE	FALSE
HP	K55-K63	Other diseases of intestines	FINRISK97	7452	317	106	1.22	0.0654	[1.07, 1.39]	0.00225223	0.0362715	FALSE	FALSE
HP	K55-K63	Other diseases of intestines	DILGOM07	4764	272	221	1.23	0.0662	[1.08, 1.40]	0.00159012	0.0152583	TRUE	FALSE
HP	K55-K63	Other diseases of intestines	Training	614	32	<10	1.51	0.185871	[1.05, 2.17]	0.026611	0.075793	FALSE	FALSE
HP	K55-K63	Other diseases of intestines	Immunoassayed	626	33	<10	1.54	0.217861	[1.00, 2.37]	0.0474881	0.0721243	FALSE	FALSE
HP	K57	Diverticular disease of intestine	Meta-analysis	12216	279	109	1.29579	0.0663899	[1.14, 1.48]	9.50073e-05	0.00120236	TRUE	FALSE
HP	K57	Diverticular disease of intestine	FINRISK97	7452	131	27	1.2	0.1024	[0.98, 1.46]	0.0818714	0.283941	FALSE	FALSE
HP	K57	Diverticular disease of intestine	DILGOM07	4764	148	82	1.37	0.0872	[1.16, 1.63]	0.000288513	0.00527204	TRUE	FALSE
HP	K57	Diverticular disease of intestine	Immunoassayed	626	21	<10	1.89	0.301746	[1.05, 3.42]	0.034889	0.059342	FALSE	FALSE
HP	K58	Irritable bowel syndrome	Meta-analysis	12216	59	36	1.27	0.147992	[0.95, 1.70]	0.106296	0.220904	FALSE	FALSE
HP	K58	Irritable bowel syndrome	FINRISK97	7452	31	5	1.27	0.2122	[0.84, 1.93]	0.256021	0.51204	FALSE	FALSE
HP	K58	Irritable bowel syndrome	DILGOM07	4764	28	31	1.27	0.2065	[0.85, 1.91]	0.24193	0.302044	FALSE	FALSE
HP	K59	Other functional intestinal disorders	Meta-analysis	12216	95	42	1.09345	0.113892	[0.87, 1.37]	0.432818	0.476256	FALSE	FALSE
HP	K59	Other functional intestinal disorders	FINRISK97	7452	55	15	1.03	0.1563	[0.76, 1.39]	0.869082	0.800996	FALSE	FALSE
HP	K59	Other functional intestinal disorders	DILGOM07	4764	40	27	1.17	0.1663	[0.85, 1.62]	0.338923	0.335591	FALSE	FALSE
HP	K62	Other diseases of anus and rectum	Meta-analysis	12216	81	43	1.04032	0.128102	[0.81, 1.34]	0.757647	0.647724	FALSE	FALSE
HP	K62	Other diseases of anus and rectum	FINRISK97	7452	44	10	1.28	0.168	[0.92, 1.78]	0.137435	0.383081	FALSE	FALSE
HP	K62	Other diseases of anus and rectum	DILGOM07	4764	37	33	0.78	0.198	[0.53, 1.15]	0.203476	0.276349	FALSE	FALSE
HP	K70-K77	Diseases of liver	Meta-analysis	12216	70	46	1.29712	0.14202	[0.98, 1.71]	0.0669833	0.169979	FALSE	FALSE
HP	K70-K77	Diseases of liver	FINRISK97	7452	36	13	1.6	0.1893	[1.10, 2.32]	0.0130208	0.0962206	FALSE	FALSE
HP	K70-K77	Diseases of liver	DILGOM07	4764	34	33	0.99	0.2148	[0.65, 1.51]	0.969265	0.568703	FALSE	FALSE
HP	K80-K87	Diseases of gallbladder biliary tract and pancreas	Meta-analysis	12216	306	355	1.12153	0.0674131	[0.98, 1.28]	0.0888635	0.195821	FALSE	FALSE
HP	K80-K87	Diseases of gallbladder biliary tract and pancreas	FINRISK97	7452	175	160	1.14	0.0915	[0.95, 1.36]	0.165561	0.428516	FALSE	FALSE
HP	K80-K87	Diseases of gallbladder biliary tract and pancreas	DILGOM07	4764	131	195	1.1	0.0997	[0.90, 1.34]	0.341719	0.336702	FALSE	FALSE
HP	K80	Cholelithiasis	Meta-analysis	12216	242	292	1.13554	0.0766836	[0.98, 1.32]	0.0973983	0.210265	FALSE	FALSE
HP	K80	Cholelithiasis	FINRISK97	7452	142	129	1.14	0.1029	[0.93, 1.39]	0.217338	0.492858	FALSE	FALSE
HP	K80	Cholelithiasis	DILGOM07	4764	100	163	1.13	0.115	[0.91, 1.42]	0.273182	0.310151	FALSE	FALSE
HP	K90-K93	Other diseases of the digestive system	Meta-analysis	12216	125	79	1.0821	0.102039	[0.89, 1.32]	0.439368	0.47792	FALSE	FALSE
HP	K90-K93	Other diseases of the digestive system	FINRISK97	7452	83	28	1.24	0.1246	[0.97, 1.58]	0.087987	0.293174	FALSE	FALSE
HP	K90-K93	Other diseases of the digestive system	DILGOM07	4764	42	51	0.82	0.1778	[0.58, 1.16]	0.26467	0.310151	FALSE	FALSE
HP	L00-L08	Infections of the skin and subcutaneous tissue	Meta-analysis	12216	116	112	1.34	0.102616	[1.10, 1.64]	0.00434344	0.0205605	FALSE	FALSE
HP	L00-L08	Infections of the skin and subcutaneous tissue	FINRISK97	7452	78	39	1.34	0.1275	[1.04, 1.72]	0.0227167	0.134392	FALSE	FALSE
HP	L00-L08	Infections of the skin and subcutaneous tissue	DILGOM07	4764	38	73	1.34	0.1729	[0.95, 1.88]	0.0927617	0.182799	FALSE	FALSE
HP	L20-L30	Dermatitis and eczema	Meta-analysis	12216	334	188	1.06827	0.063708	[0.94, 1.21]	0.299942	0.396935	FALSE	FALSE
HP	L20-L30	Dermatitis and eczema	FINRISK97	7452	186	50	1.05	0.0868	[0.89, 1.25]	0.57011	0.717393	FALSE	FALSE
HP	L20-L30	Dermatitis and eczema	DILGOM07	4764	148	138	1.09	0.0938	[0.91, 1.32]	0.335544	0.33389	FALSE	FALSE
HP	L20	Atopic dermatitis	Meta-analysis	12216	86	63	0.995556	0.125146	[0.78, 1.27]	0.97161	0.722313	FALSE	FALSE
HP	L20	Atopic dermatitis	FINRISK97	7452	50	14	0.95	0.1654	[0.69, 1.31]	0.744865	0.7843	FALSE	FALSE
HP	L20	Atopic dermatitis	DILGOM07	4764	36	49	1.06	0.1914	[0.73, 1.54]	0.756442	0.490508	FALSE	FALSE
HP	L30	Other dermatitis	Meta-analysis	12216	199	72	1.0711	0.0833577	[0.91, 1.26]	0.409914	0.467777	FALSE	FALSE
HP	L30	Other dermatitis	FINRISK97	7452	104	5	1.1	0.115	[0.88, 1.38]	0.403427	0.628991	FALSE	FALSE
HP	L30	Other dermatitis	DILGOM07	4764	95	67	1.04	0.121	[0.82, 1.32]	0.756104	0.490508	FALSE	FALSE
HP	L40-L45	Papulosquamous disorders	Meta-analysis	12216	123	67	1.34681	0.103909	[1.10, 1.65]	0.00416486	0.0200872	FALSE	FALSE
HP	L40-L45	Papulosquamous disorders	FINRISK97	7452	62	11	1.26	0.1468	[0.95, 1.69]	0.10967	0.33465	FALSE	FALSE
HP	L40-L45	Papulosquamous disorders	DILGOM07	4764	61	56	1.44	0.1471	[1.08, 1.92]	0.0133808	0.0537921	FALSE	FALSE
HP	L40	Psoriasis	Meta-analysis	12216	79	40	1.2746	0.12927	[0.99, 1.64]	0.0605237	0.159495	FALSE	FALSE
HP	L40	Psoriasis	FINRISK97	7452	39	7	1.45	0.1797	[1.02, 2.07]	0.0377553	0.178485	FALSE	FALSE
HP	L40	Psoriasis	DILGOM07	4764	40	33	1.11	0.1861	[0.77, 1.60]	0.565466	0.421448	FALSE	FALSE
HP	L50-L54	Urticaria and erythema	Meta-analysis	12216	78	64	1.04865	0.13165	[0.81, 1.36]	0.71821	0.633064	FALSE	FALSE
HP	L50-L54	Urticaria and erythema	FINRISK97	7452	47	16	1.2	0.1653	[0.87, 1.66]	0.268867	0.523092	FALSE	FALSE
HP	L50-L54	Urticaria and erythema	DILGOM07	4764	31	48	0.83	0.2177	[0.54, 1.27]	0.393043	0.357983	FALSE	FALSE
HP	L50	Urticaria	Meta-analysis	12216	59	51	0.987552	0.157273	[0.73, 1.34]	0.936517	0.718895	FALSE	FALSE
HP	L50	Urticaria	FINRISK97	7452	38	12	0.97	0.1961	[0.66, 1.42]	0.86906	0.800996	FALSE	FALSE
HP	L50	Urticaria	DILGOM07	4764	21	39	1.02	0.2633	[0.61, 1.70]	0.952583	0.563157	FALSE	FALSE
HP	L55-L59	Radiation-related disorders of the skin and subcutaneous tissue	Meta-analysis	12216	95	23	0.830059	0.126951	[0.65, 1.06]	0.14233	0.265564	FALSE	FALSE
HP	L55-L59	Radiation-related disorders of the skin and subcutaneous tissue	FINRISK97	7452	29	2	0.7	0.2356	[0.44, 1.11]	0.133904	0.380556	FALSE	FALSE
HP	L55-L59	Radiation-related disorders of the skin and subcutaneous tissue	DILGOM07	4764	66	21	0.89	0.1507	[0.66, 1.19]	0.424671	0.366802	FALSE	FALSE
HP	L57	Skin changes due to chronic exposure to nonionising radiation	Meta-analysis	12216	94	19	0.822042	0.128552	[0.64, 1.06]	0.127411	0.250528	FALSE	FALSE
HP	L57	Skin changes due to chronic exposure to nonionising radiation	FINRISK97	7452	29	1	0.7	0.2356	[0.44, 1.11]	0.133904	0.380556	FALSE	FALSE
HP	L57	Skin changes due to chronic exposure to nonionising radiation	DILGOM07	4764	65	18	0.88	0.1534	[0.65, 1.19]	0.411923	0.363151	FALSE	FALSE
HP	L60-L75	Disorders of skin appendages	Meta-analysis	12216	105	70	1.02384	0.113974	[0.82, 1.28]	0.836245	0.670096	FALSE	FALSE
HP	L60-L75	Disorders of skin appendages	FINRISK97	7452	51	11	1.06	0.1625	[0.77, 1.46]	0.721543	0.763374	FALSE	FALSE
HP	L60-L75	Disorders of skin appendages	DILGOM07	4764	54	59	0.99	0.1599	[0.72, 1.35]	0.932912	0.559963	FALSE	FALSE
HP	L72	Follicular cysts of skin and subcutaneous tissue	Meta-analysis	12216	45	30	0.924061	0.175309	[0.66, 1.30]	0.652351	0.601998	FALSE	FALSE
HP	L72	Follicular cysts of skin and subcutaneous tissue	FINRISK97	7452	21	3	0.78	0.2735	[0.46, 1.34]	0.373916	0.61013	FALSE	FALSE
HP	L72	Follicular cysts of skin and subcutaneous tissue	DILGOM07	4764	24	27	1.04	0.2284	[0.66, 1.62]	0.87313	0.542279	FALSE	FALSE
HP	L80-L99	Other disorders of the skin and subcutaneous tissue	Meta-analysis	12216	191	92	1.17002	0.082594	[1.00, 1.38]	0.0572907	0.152548	FALSE	FALSE
HP	L80-L99	Other disorders of the skin and subcutaneous tissue	FINRISK97	7452	88	25	1.05	0.1258	[0.82, 1.35]	0.683423	0.75668	FALSE	FALSE
HP	L80-L99	Other disorders of the skin and subcutaneous tissue	DILGOM07	4764	103	67	1.27	0.1095	[1.02, 1.57]	0.03008	0.0876262	FALSE	FALSE
HP	M05-M14	Inflammatory polyarthropathies	Meta-analysis	12216	323	208	1.42013	0.0571882	[1.27, 1.59]	8.61411e-10	7.26698e-08	TRUE	TRUE
HP	M05-M14	Inflammatory polyarthropathies	FINRISK97	7452	176	76	1.49	0.0773	[1.28, 1.74]	2.05059e-07	3.83371e-05	TRUE	TRUE
HP	M05-M14	Inflammatory polyarthropathies	DILGOM07	4764	147	132	1.34	0.085	[1.13, 1.58]	0.000634648	0.00910768	TRUE	TRUE
HP	M05	Seropositive rheumatoid arthritis	Meta-analysis	12216	136	75	1.2505	0.0886001	[1.05, 1.49]	0.0116338	0.0418849	FALSE	FALSE
HP	M05	Seropositive rheumatoid arthritis	FINRISK97	7452	77	18	1.46	0.1251	[1.14, 1.86]	0.00253828	0.0367905	FALSE	FALSE
HP	M05	Seropositive rheumatoid arthritis	DILGOM07	4764	59	57	1.07	0.1255	[0.84, 1.37]	0.573531	0.425396	FALSE	FALSE
HP	M06	Other rheumatoid arthritis	Meta-analysis	12216	65	82	1.52441	0.131618	[1.18, 1.97]	0.0013588	0.00847162	TRUE	FALSE
HP	M06	Other rheumatoid arthritis	FINRISK97	7452	36	42	1.45	0.1777	[1.02, 2.06]	0.0362935	0.178321	FALSE	FALSE
HP	M06	Other rheumatoid arthritis	DILGOM07	4764	29	40	1.62	0.1959	[1.10, 2.37]	0.0142242	0.0558618	FALSE	FALSE
HP	M10	Gout	Meta-analysis	12216	56	24	1.42173	0.152239	[1.05, 1.92]	0.0208161	0.0685368	FALSE	FALSE
HP	M10	Gout	FINRISK97	7452	28	9	2.19	0.2149	[1.44, 3.34]	0.000255825	0.00572383	TRUE	FALSE
HP	M10	Gout	DILGOM07	4764	28	15	0.92	0.2157	[0.60, 1.40]	0.700342	0.473749	FALSE	FALSE
HP	M13	Other arthritis	Meta-analysis	12216	77	43	1.19414	0.125571	[0.93, 1.53]	0.157671	0.272772	FALSE	FALSE
HP	M13	Other arthritis	FINRISK97	7452	38	4	0.88	0.1973	[0.60, 1.30]	0.535634	0.717393	FALSE	FALSE
HP	M13	Other arthritis	DILGOM07	4764	39	39	1.47	0.1628	[1.07, 2.02]	0.0179921	0.0634474	FALSE	FALSE
HP	M15-M19	Arthrosis	Meta-analysis	12216	895	496	0.983525	0.0396367	[0.91, 1.06]	0.675143	0.609823	FALSE	FALSE
HP	M15-M19	Arthrosis	FINRISK97	7452	440	173	1.01	0.0574	[0.91, 1.13]	0.813819	0.799883	FALSE	FALSE
HP	M15-M19	Arthrosis	DILGOM07	4764	455	323	0.96	0.0548	[0.86, 1.06]	0.414016	0.363402	FALSE	FALSE
HP	M15-M19	Arthrosis	Training	614	40	<10	1.46	0.167582	[1.05, 2.03]	0.0239324	0.075793	FALSE	FALSE
HP	M15-M19	Arthrosis	Immunoassayed	626	40	<10	1.44	0.197406	[0.98, 2.13]	0.0647223	0.0736977	FALSE	FALSE
HP	M15	Polyarthrosis	Meta-analysis	12216	51	15	0.729784	0.172161	[0.52, 1.02]	0.0672915	0.169979	FALSE	FALSE
HP	M15	Polyarthrosis	FINRISK97	7452	22	1	0.96	0.2605	[0.58, 1.60]	0.873658	0.800996	FALSE	FALSE
HP	M15	Polyarthrosis	DILGOM07	4764	29	14	0.59	0.2294	[0.38, 0.93]	0.023003	0.0733921	FALSE	FALSE
HP	M16	Coxarthrosis [arthrosis of hip]	Meta-analysis	12216	261	86	1.1062	0.0710581	[0.96, 1.27]	0.155509	0.272772	FALSE	FALSE
HP	M16	Coxarthrosis [arthrosis of hip]	FINRISK97	7452	130	12	1.16	0.1033	[0.94, 1.41]	0.162744	0.427176	FALSE	FALSE
HP	M16	Coxarthrosis [arthrosis of hip]	DILGOM07	4764	131	74	1.06	0.0979	[0.87, 1.28]	0.58163	0.426947	FALSE	FALSE
HP	M17	Gonarthrosis [arthrosis of knee]	Meta-analysis	12216	543	221	0.924629	0.0529269	[0.83, 1.03]	0.138716	0.260724	FALSE	FALSE
HP	M17	Gonarthrosis [arthrosis of knee]	FINRISK97	7452	277	27	0.95	0.0749	[0.82, 1.10]	0.466132	0.685912	FALSE	FALSE
HP	M17	Gonarthrosis [arthrosis of knee]	DILGOM07	4764	266	194	0.9	0.0748	[0.78, 1.05]	0.170681	0.2558	FALSE	FALSE
HP	M19	Other arthrosis	Meta-analysis	12216	142	247	1.06886	0.0972884	[0.88, 1.29]	0.493693	0.512999	FALSE	FALSE
HP	M19	Other arthrosis	FINRISK97	7452	50	145	1.03	0.1654	[0.75, 1.42]	0.856651	0.800996	FALSE	FALSE
HP	M19	Other arthrosis	DILGOM07	4764	92	102	1.09	0.1203	[0.86, 1.38]	0.463924	0.380615	FALSE	FALSE
HP	M20-M25	Other joint disorders	Meta-analysis	12216	733	808	0.976877	0.0439075	[0.90, 1.06]	0.594161	0.578679	FALSE	FALSE
HP	M20-M25	Other joint disorders	FINRISK97	7452	440	291	0.96	0.058	[0.86, 1.07]	0.460165	0.680587	FALSE	FALSE
HP	M20-M25	Other joint disorders	DILGOM07	4764	293	517	1	0.0672	[0.88, 1.14]	0.989293	0.570248	FALSE	FALSE
HP	M20-M25	Other joint disorders	Training	614	32	<10	1.36	0.175397	[0.96, 1.91]	0.0795878	0.15142	FALSE	FALSE
HP	M20-M25	Other joint disorders	Immunoassayed	626	32	<10	1.27	0.194462	[0.87, 1.84]	0.219028	0.162957	FALSE	FALSE
HP	M20	Acquired deformities of fingers and toes	Meta-analysis	12216	215	252	1.03434	0.0796774	[0.88, 1.21]	0.671737	0.608898	FALSE	FALSE
HP	M20	Acquired deformities of fingers and toes	FINRISK97	7452	113	101	0.97	0.1139	[0.78, 1.21]	0.79399	0.796421	FALSE	FALSE
HP	M20	Acquired deformities of fingers and toes	DILGOM07	4764	102	151	1.1	0.1115	[0.88, 1.37]	0.397469	0.359465	FALSE	FALSE
HP	M23	Internal derangement of knee	Meta-analysis	12216	284	310	0.93	0.0713604	[0.81, 1.07]	0.309172	0.396935	FALSE	FALSE
HP	M23	Internal derangement of knee	FINRISK97	7452	171	98	0.93	0.0927	[0.78, 1.12]	0.439112	0.666398	FALSE	FALSE
HP	M23	Internal derangement of knee	DILGOM07	4764	113	212	0.93	0.1118	[0.74, 1.15]	0.499159	0.39702	FALSE	FALSE
HP	M25	Other joint disorders not elsewhere classified	Meta-analysis	12216	214	146	1.05002	0.0797744	[0.90, 1.23]	0.540615	0.550565	FALSE	FALSE
HP	M25	Other joint disorders not elsewhere classified	FINRISK97	7452	149	22	1.03	0.0982	[0.85, 1.24]	0.787296	0.796421	FALSE	FALSE
HP	M25	Other joint disorders not elsewhere classified	DILGOM07	4764	65	124	1.09	0.1368	[0.84, 1.43]	0.515491	0.406281	FALSE	FALSE
HP	M30-M36	Systemic connective tissue disorders	Meta-analysis	12216	90	41	1.36257	0.117533	[1.08, 1.72]	0.00848339	0.0328564	FALSE	FALSE
HP	M30-M36	Systemic connective tissue disorders	FINRISK97	7452	48	8	1.09	0.1702	[0.78, 1.52]	0.614283	0.723868	FALSE	FALSE
HP	M30-M36	Systemic connective tissue disorders	DILGOM07	4764	42	33	1.67	0.1625	[1.21, 2.29]	0.00168381	0.0152583	TRUE	FALSE
HP	M35	Other systemic involvement of connective tissue	Meta-analysis	12216	64	28	1.28974	0.140337	[0.98, 1.70]	0.0698218	0.169979	FALSE	FALSE
HP	M35	Other systemic involvement of connective tissue	FINRISK97	7452	35	6	1.03	0.2006	[0.69, 1.52]	0.88681	0.800996	FALSE	FALSE
HP	M35	Other systemic involvement of connective tissue	DILGOM07	4764	29	22	1.6	0.1964	[1.09, 2.35]	0.0163447	0.0608401	FALSE	FALSE
HP	M40-M43	Deforming dorsopathies	Meta-analysis	12216	67	43	1.10197	0.138442	[0.84, 1.45]	0.483071	0.508485	FALSE	FALSE
HP	M40-M43	Deforming dorsopathies	FINRISK97	7452	34	13	0.99	0.208	[0.66, 1.49]	0.975155	0.820472	FALSE	FALSE
HP	M40-M43	Deforming dorsopathies	DILGOM07	4764	33	30	1.2	0.1855	[0.84, 1.73]	0.315792	0.323855	FALSE	FALSE
HP	M43	Other deforming dorsopathies	Meta-analysis	12216	54	33	1.16864	0.150609	[0.87, 1.57]	0.300793	0.396935	FALSE	FALSE
HP	M43	Other deforming dorsopathies	FINRISK97	7452	26	11	1.18	0.2286	[0.75, 1.85]	0.469243	0.687002	FALSE	FALSE
HP	M43	Other deforming dorsopathies	DILGOM07	4764	28	22	1.16	0.2002	[0.78, 1.71]	0.46664	0.381287	FALSE	FALSE
HP	M45-M49	Spondylopathies	Meta-analysis	12216	402	272	1.12663	0.0584776	[1.00, 1.26]	0.041462	0.120438	FALSE	FALSE
HP	M45-M49	Spondylopathies	FINRISK97	7452	208	95	1.04	0.0828	[0.88, 1.22]	0.675092	0.75668	FALSE	FALSE
HP	M45-M49	Spondylopathies	DILGOM07	4764	194	177	1.22	0.0826	[1.03, 1.43]	0.0177118	0.0634474	FALSE	FALSE
HP	M45-M49	Spondylopathies	Training	614	23	<10	1.4	0.278837	[0.81, 2.43]	0.227548	0.332198	FALSE	FALSE
HP	M45-M49	Spondylopathies	Immunoassayed	626	23	<10	1.11	0.301577	[0.62, 1.99]	0.729307	0.267822	FALSE	FALSE
HP	M47	Spondylosis	Meta-analysis	12216	169	130	1.04161	0.0912028	[0.87, 1.25]	0.654889	0.602167	FALSE	FALSE
HP	M47	Spondylosis	FINRISK97	7452	82	46	0.88	0.135	[0.68, 1.15]	0.353071	0.589205	FALSE	FALSE
HP	M47	Spondylosis	DILGOM07	4764	87	84	1.2	0.1237	[0.94, 1.53]	0.140025	0.229242	FALSE	FALSE
HP	M48	Other spondylopathies	Meta-analysis	12216	232	112	1.02573	0.0773151	[0.88, 1.19]	0.742459	0.639368	FALSE	FALSE
HP	M48	Other spondylopathies	FINRISK97	7452	123	38	0.88	0.1102	[0.71, 1.10]	0.25754	0.51204	FALSE	FALSE
HP	M48	Other spondylopathies	DILGOM07	4764	109	74	1.19	0.1085	[0.96, 1.48]	0.103079	0.195465	FALSE	FALSE
HP	M50-M54	Other dorsopathies	Meta-analysis	12216	938	729	1.019	0.0383211	[0.95, 1.10]	0.623312	0.58803	FALSE	FALSE
HP	M50-M54	Other dorsopathies	FINRISK97	7452	547	280	0.98	0.0514	[0.88, 1.08]	0.653935	0.745035	FALSE	FALSE
HP	M50-M54	Other dorsopathies	DILGOM07	4764	391	449	1.07	0.0575	[0.96, 1.20]	0.238328	0.30143	FALSE	FALSE
HP	M50-M54	Other dorsopathies	Training	614	36	<10	1.34	0.183461	[0.93, 1.93]	0.110653	0.197441	FALSE	FALSE
HP	M50-M54	Other dorsopathies	Immunoassayed	626	36	<10	1.28	0.20282	[0.86, 1.89]	0.223551	0.162957	FALSE	FALSE
HP	M50	Cervical disk disorders	Meta-analysis	12216	90	55	1.27153	0.120297	[1.00, 1.61]	0.0458331	0.131639	FALSE	FALSE
HP	M50	Cervical disk disorders	FINRISK97	7452	41	11	1.41	0.1754	[1.00, 1.99]	0.0496638	0.208649	FALSE	FALSE
HP	M50	Cervical disk disorders	DILGOM07	4764	49	44	1.16	0.1653	[0.84, 1.60]	0.380998	0.357983	FALSE	FALSE
HP	M51	Other intervertebral disk disorders	Meta-analysis	12216	472	415	1.02856	0.0542036	[0.92, 1.14]	0.603355	0.580552	FALSE	FALSE
HP	M51	Other intervertebral disk disorders	FINRISK97	7452	282	164	0.97	0.0721	[0.84, 1.11]	0.642341	0.738909	FALSE	FALSE
HP	M51	Other intervertebral disk disorders	DILGOM07	4764	190	251	1.11	0.0822	[0.94, 1.30]	0.213344	0.285314	FALSE	FALSE
HP	M51	Other intervertebral disk disorders	Training	614	21	<10	1.06	0.248029	[0.66, 1.71]	0.814265	0.672528	FALSE	FALSE
HP	M51	Other intervertebral disk disorders	Immunoassayed	626	21	<10	1.08	0.234511	[0.67, 1.76]	0.742779	0.267822	FALSE	FALSE
HP	M53	Other dorsopathies not elsewhere classified	Meta-analysis	12216	115	85	1.12153	0.107309	[0.91, 1.38]	0.285149	0.39188	FALSE	FALSE
HP	M53	Other dorsopathies not elsewhere classified	FINRISK97	7452	59	24	0.94	0.1549	[0.69, 1.27]	0.676492	0.75668	FALSE	FALSE
HP	M53	Other dorsopathies not elsewhere classified	DILGOM07	4764	56	61	1.32	0.1488	[0.99, 1.77]	0.0610555	0.141062	FALSE	FALSE
HP	M54	Dorsalgia	Meta-analysis	12216	518	345	0.982201	0.0516029	[0.89, 1.09]	0.727816	0.635711	FALSE	FALSE
HP	M54	Dorsalgia	FINRISK97	7452	300	117	0.96	0.0696	[0.84, 1.10]	0.563879	0.717393	FALSE	FALSE
HP	M54	Dorsalgia	DILGOM07	4764	218	228	1.01	0.0769	[0.87, 1.17]	0.891053	0.547724	FALSE	FALSE
HP	M54	Dorsalgia	Training	614	22	<10	1.18	0.225484	[0.75, 1.86]	0.462924	0.495603	FALSE	FALSE
HP	M54	Dorsalgia	Immunoassayed	626	22	<10	1.11	0.242033	[0.69, 1.80]	0.666337	0.261544	FALSE	FALSE
HP	M65-M68	Disorders of synovium and tendon	Meta-analysis	12216	169	153	1.11516	0.087291	[0.94, 1.32]	0.211784	0.322239	FALSE	FALSE
HP	M65-M68	Disorders of synovium and tendon	FINRISK97	7452	74	52	0.93	0.1405	[0.71, 1.23]	0.618941	0.726404	FALSE	FALSE
HP	M65-M68	Disorders of synovium and tendon	DILGOM07	4764	95	101	1.25	0.1114	[1.00, 1.55]	0.0473255	0.124442	FALSE	FALSE
HP	M65	Synovitis and tenosynovitis	Meta-analysis	12216	77	56	1.09494	0.126478	[0.85, 1.40]	0.473298	0.504101	FALSE	FALSE
HP	M65	Synovitis and tenosynovitis	FINRISK97	7452	35	19	0.89	0.2065	[0.60, 1.34]	0.579092	0.717393	FALSE	FALSE
HP	M65	Synovitis and tenosynovitis	DILGOM07	4764	42	37	1.24	0.16	[0.91, 1.70]	0.176993	0.257799	FALSE	FALSE
HP	M67	Other disorders of synovium and tendon	Meta-analysis	12216	84	82	1.16204	0.12729	[0.91, 1.49]	0.238091	0.350943	FALSE	FALSE
HP	M67	Other disorders of synovium and tendon	FINRISK97	7452	37	25	0.96	0.1978	[0.65, 1.42]	0.85508	0.800996	FALSE	FALSE
HP	M67	Other disorders of synovium and tendon	DILGOM07	4764	47	57	1.33	0.1663	[0.96, 1.84]	0.085459	0.173512	FALSE	FALSE
HP	M70-M79	Other soft tissue disorders	Meta-analysis	12216	892	578	0.98423	0.0399508	[0.91, 1.06]	0.690719	0.615196	FALSE	FALSE
HP	M70-M79	Other soft tissue disorders	FINRISK97	7452	478	141	0.89	0.0563	[0.79, 0.99]	0.0302711	0.157438	FALSE	FALSE
HP	M70-M79	Other soft tissue disorders	DILGOM07	4764	414	437	1.09	0.0567	[0.97, 1.22]	0.138347	0.229242	FALSE	FALSE
HP	M70-M79	Other soft tissue disorders	Training	614	60	<10	1.16	0.14153	[0.88, 1.52]	0.294325	0.378123	FALSE	FALSE
HP	M70-M79	Other soft tissue disorders	Immunoassayed	626	60	<10	1.24	0.152342	[0.92, 1.67]	0.157942	0.13432	FALSE	FALSE
HP	M70	Soft tissue disorders related to use overuse and pressure	Meta-analysis	12216	63	27	1.01637	0.14418	[0.77, 1.35]	0.910322	0.715295	FALSE	FALSE
HP	M70	Soft tissue disorders related to use overuse and pressure	FINRISK97	7452	34	1	0.69	0.2217	[0.45, 1.07]	0.0978581	0.315196	FALSE	FALSE
HP	M70	Soft tissue disorders related to use overuse and pressure	DILGOM07	4764	29	26	1.35	0.1898	[0.93, 1.96]	0.111571	0.203875	FALSE	FALSE
HP	M72	Fibroblastic disorders	Meta-analysis	12216	76	72	0.841672	0.144391	[0.63, 1.12]	0.23258	0.345651	FALSE	FALSE
HP	M72	Fibroblastic disorders	FINRISK97	7452	44	27	0.67	0.1981	[0.45, 0.98]	0.0415164	0.182348	FALSE	FALSE
HP	M72	Fibroblastic disorders	DILGOM07	4764	32	45	1.09	0.2109	[0.72, 1.64]	0.69655	0.473005	FALSE	FALSE
HP	M75	Shoulder lesions	Meta-analysis	12216	406	258	1.0124	0.0593525	[0.90, 1.14]	0.835561	0.670096	FALSE	FALSE
HP	M75	Shoulder lesions	FINRISK97	7452	210	50	0.96	0.0831	[0.81, 1.13]	0.587362	0.721577	FALSE	FALSE
HP	M75	Shoulder lesions	DILGOM07	4764	196	208	1.07	0.0848	[0.91, 1.26]	0.428839	0.366802	FALSE	FALSE
HP	M75	Shoulder lesions	Training	614	21	<10	1.07	0.24299	[0.66, 1.74]	0.780673	0.672528	FALSE	FALSE
HP	M75	Shoulder lesions	Immunoassayed	626	21	<10	1.31	0.255389	[0.79, 2.16]	0.290368	0.185205	FALSE	FALSE
HP	M77	Other enthesopathies	Meta-analysis	12216	92	90	0.992955	0.122687	[0.78, 1.26]	0.954049	0.722313	FALSE	FALSE
HP	M77	Other enthesopathies	FINRISK97	7452	53	32	0.98	0.1633	[0.71, 1.34]	0.880927	0.800996	FALSE	FALSE
HP	M77	Other enthesopathies	DILGOM07	4764	39	58	1.01	0.1859	[0.70, 1.45]	0.972021	0.568703	FALSE	FALSE
HP	M79	Other soft tissue disorders not elsewhere classified	Meta-analysis	12216	257	133	1.0175	0.0733977	[0.88, 1.17]	0.813181	0.669715	FALSE	FALSE
HP	M79	Other soft tissue disorders not elsewhere classified	FINRISK97	7452	145	26	0.87	0.1038	[0.71, 1.07]	0.189948	0.455068	FALSE	FALSE
HP	M79	Other soft tissue disorders not elsewhere classified	DILGOM07	4764	112	107	1.19	0.1038	[0.97, 1.46]	0.0965181	0.186544	FALSE	FALSE
HP	M79	Other soft tissue disorders not elsewhere classified	Training	614	24	<10	1.29	0.219324	[0.84, 1.98]	0.245629	0.343003	FALSE	FALSE
HP	M79	Other soft tissue disorders not elsewhere classified	Immunoassayed	626	25	<10	1.52	0.252746	[0.93, 2.51]	0.0975916	0.0995948	FALSE	FALSE
HP	M80-M85	Disorders of bone density and structure	Meta-analysis	12216	77	31	1.05664	0.134966	[0.81, 1.38]	0.683121	0.614856	FALSE	FALSE
HP	M80-M85	Disorders of bone density and structure	FINRISK97	7452	31	6	0.86	0.2231	[0.55, 1.33]	0.494845	0.691897	FALSE	FALSE
HP	M80-M85	Disorders of bone density and structure	DILGOM07	4764	46	25	1.19	0.1695	[0.85, 1.66]	0.309415	0.321446	FALSE	FALSE
HP	N00-N08	Glomerular diseases	Meta-analysis	12216	66	33	1.86728	0.127438	[1.45, 2.40]	9.57085e-07	2.77326e-05	TRUE	FALSE
HP	N00-N08	Glomerular diseases	FINRISK97	7452	45	6	1.89	0.1546	[1.40, 2.56]	3.60824e-05	0.00161689	TRUE	FALSE
HP	N00-N08	Glomerular diseases	DILGOM07	4764	21	27	1.82	0.2251	[1.17, 2.82]	0.00798287	0.0377008	FALSE	FALSE
HP	N10-N16	Renal tubulo-interstitial diseases	Meta-analysis	12216	139	91	1.31479	0.0894766	[1.10, 1.57]	0.00222371	0.0123606	TRUE	FALSE
HP	N10-N16	Renal tubulo-interstitial diseases	FINRISK97	7452	70	37	1.4	0.134	[1.08, 1.82]	0.0118194	0.0951742	FALSE	FALSE
HP	N10-N16	Renal tubulo-interstitial diseases	DILGOM07	4764	69	54	1.25	0.1202	[0.99, 1.59]	0.0599016	0.140006	FALSE	FALSE
HP	N10	Acute tubulo interstitial nephritis	Meta-analysis	12216	112	69	1.34993	0.100166	[1.11, 1.64]	0.00273913	0.0140035	TRUE	FALSE
HP	N10	Acute tubulo interstitial nephritis	FINRISK97	7452	57	29	1.4	0.149	[1.04, 1.87]	0.0248987	0.138803	FALSE	FALSE
HP	N10	Acute tubulo interstitial nephritis	DILGOM07	4764	55	40	1.31	0.1353	[1.00, 1.70]	0.0488539	0.124793	FALSE	FALSE
HP	N20-N23	Urolithiasis	Meta-analysis	12216	82	110	0.91735	0.132883	[0.71, 1.19]	0.516214	0.530037	FALSE	FALSE
HP	N20-N23	Urolithiasis	FINRISK97	7452	48	57	1.07	0.1765	[0.75, 1.51]	0.719208	0.763374	FALSE	FALSE
HP	N20-N23	Urolithiasis	DILGOM07	4764	34	53	0.75	0.2019	[0.51, 1.12]	0.16312	0.248972	FALSE	FALSE
HP	N20	Calculus of kidney and ureter	Meta-analysis	12216	74	105	0.995617	0.139489	[0.76, 1.31]	0.974878	0.722313	FALSE	FALSE
HP	N20	Calculus of kidney and ureter	FINRISK97	7452	44	55	1.15	0.1818	[0.81, 1.64]	0.441065	0.666398	FALSE	FALSE
HP	N20	Calculus of kidney and ureter	DILGOM07	4764	30	50	0.81	0.2175	[0.53, 1.23]	0.320318	0.326829	FALSE	FALSE
HP	N30-N39	Other diseases of the urinary system	Meta-analysis	12216	354	242	1.06893	0.0614547	[0.95, 1.21]	0.278055	0.388396	FALSE	FALSE
HP	N30-N39	Other diseases of the urinary system	FINRISK97	7452	202	74	1	0.0828	[0.85, 1.17]	0.989927	0.823839	FALSE	FALSE
HP	N30-N39	Other diseases of the urinary system	DILGOM07	4764	152	168	1.16	0.0917	[0.97, 1.39]	0.108012	0.202905	FALSE	FALSE
HP	N30	Cystitis	Meta-analysis	12216	81	35	1.04509	0.130305	[0.81, 1.35]	0.735009	0.63689	FALSE	FALSE
HP	N30	Cystitis	FINRISK97	7452	43	8	0.9	0.1827	[0.63, 1.29]	0.576677	0.717393	FALSE	FALSE
HP	N30	Cystitis	DILGOM07	4764	38	27	1.22	0.1859	[0.85, 1.76]	0.278794	0.310151	FALSE	FALSE
HP	N39	Other disorders of urinary system	Meta-analysis	12216	246	178	1.09842	0.0736525	[0.95, 1.27]	0.202468	0.311776	FALSE	FALSE
HP	N39	Other disorders of urinary system	FINRISK97	7452	144	54	1.01	0.0988	[0.84, 1.23]	0.880432	0.800996	FALSE	FALSE
HP	N39	Other disorders of urinary system	DILGOM07	4764	102	124	1.22	0.1105	[0.98, 1.51]	0.0761497	0.162529	FALSE	FALSE
HP	N40-N51	Diseases of male genital organs	Meta-analysis	12216	531	302	1.07373	0.0478404	[0.98, 1.18]	0.136996	0.2594	FALSE	FALSE
HP	N40-N51	Diseases of male genital organs	FINRISK97	7452	310	111	1	0.0663	[0.87, 1.13]	0.948746	0.812891	FALSE	FALSE
HP	N40-N51	Diseases of male genital organs	DILGOM07	4764	221	191	1.16	0.0691	[1.02, 1.33]	0.0271848	0.0820198	FALSE	FALSE
HP	N40-N51	Diseases of male genital organs	Training	614	26	<10	1.18	0.195428	[0.80, 1.75]	0.397033	0.45516	FALSE	FALSE
HP	N40-N51	Diseases of male genital organs	Immunoassayed	626	25	<10	1.01	0.197265	[0.65, 1.56]	0.959771	0.319393	FALSE	FALSE
HP	N40	Hyperplasia of prostate	Meta-analysis	12216	412	178	1.04779	0.0545617	[0.94, 1.17]	0.392228	0.449602	FALSE	FALSE
HP	N40	Hyperplasia of prostate	FINRISK97	7452	237	63	1.01	0.0758	[0.87, 1.17]	0.905855	0.800996	FALSE	FALSE
HP	N40	Hyperplasia of prostate	DILGOM07	4764	175	115	1.09	0.0786	[0.93, 1.27]	0.29004	0.314053	FALSE	FALSE
HP	N40	Hyperplasia of prostate	Training	614	24	<10	1.12	0.22053	[0.72, 1.75]	0.607327	0.609562	FALSE	FALSE
HP	N40	Hyperplasia of prostate	Immunoassayed	626	23	<10	0.88	0.240332	[0.56, 1.40]	0.594794	0.248595	FALSE	FALSE
HP	N60-N64	Disorders of breast	Meta-analysis	12216	97	116	1.06111	0.119173	[0.84, 1.34]	0.6187	0.587925	FALSE	FALSE
HP	N60-N64	Disorders of breast	FINRISK97	7452	54	38	0.94	0.1629	[0.69, 1.30]	0.719003	0.763374	FALSE	FALSE
HP	N60-N64	Disorders of breast	DILGOM07	4764	43	78	1.22	0.1748	[0.87, 1.72]	0.250009	0.308256	FALSE	FALSE
HP	N70-N77	Inflammatory diseases of female pelvic organs	Meta-analysis	12216	85	188	0.876215	0.127784	[0.68, 1.13]	0.301084	0.396935	FALSE	FALSE
HP	N70-N77	Inflammatory diseases of female pelvic organs	FINRISK97	7452	54	80	0.83	0.1613	[0.61, 1.14]	0.257357	0.51204	FALSE	FALSE
HP	N70-N77	Inflammatory diseases of female pelvic organs	DILGOM07	4764	31	108	0.96	0.2094	[0.64, 1.45]	0.861691	0.539575	FALSE	FALSE
HP	N80-N98	Noninflammatory disorders of female genital tract	Meta-analysis	12216	902	1152	0.998016	0.0395704	[0.92, 1.08]	0.95998	0.722313	FALSE	FALSE
HP	N80-N98	Noninflammatory disorders of female genital tract	FINRISK97	7452	585	498	0.98	0.0497	[0.89, 1.08]	0.655377	0.745035	FALSE	FALSE
HP	N80-N98	Noninflammatory disorders of female genital tract	DILGOM07	4764	317	654	1.03	0.0654	[0.90, 1.17]	0.669165	0.465026	FALSE	FALSE
HP	N80-N98	Noninflammatory disorders of female genital tract	Training	614	28	<10	1.2	0.221754	[0.78, 1.86]	0.410976	0.45516	FALSE	FALSE
HP	N80-N98	Noninflammatory disorders of female genital tract	Immunoassayed	626	28	<10	1.24	0.248862	[0.76, 2.02]	0.38738	0.197666	FALSE	FALSE
HP	N81	Female genital prolapse	Meta-analysis	12216	180	164	0.950954	0.0928882	[0.79, 1.14]	0.588236	0.578325	FALSE	FALSE
HP	N81	Female genital prolapse	FINRISK97	7452	100	69	1	0.1232	[0.78, 1.27]	0.969511	0.820472	FALSE	FALSE
HP	N81	Female genital prolapse	DILGOM07	4764	80	95	0.89	0.1414	[0.67, 1.17]	0.393594	0.357983	FALSE	FALSE
HP	N83	Noninflammatory disorders of ovary Fallopian tube and broad ligament	Meta-analysis	12216	167	197	0.878969	0.093658	[0.73, 1.06]	0.168384	0.283173	FALSE	FALSE
HP	N83	Noninflammatory disorders of ovary Fallopian tube and broad ligament	FINRISK97	7452	106	82	0.81	0.1197	[0.64, 1.03]	0.0829254	0.283941	FALSE	FALSE
HP	N83	Noninflammatory disorders of ovary Fallopian tube and broad ligament	DILGOM07	4764	61	115	1	0.1504	[0.74, 1.34]	0.977659	0.569605	FALSE	FALSE
HP	N84	Polyp of female genital tract	Meta-analysis	12216	154	146	0.929211	0.0975716	[0.77, 1.13]	0.451772	0.485217	FALSE	FALSE
HP	N84	Polyp of female genital tract	FINRISK97	7452	108	45	0.87	0.1195	[0.69, 1.10]	0.252845	0.51204	FALSE	FALSE
HP	N84	Polyp of female genital tract	DILGOM07	4764	46	101	1.06	0.169	[0.76, 1.47]	0.746021	0.488448	FALSE	FALSE
HP	N85	Other noninflammatory disorders of uterus except cervix	Meta-analysis	12216	55	83	0.868665	0.162398	[0.63, 1.19]	0.385947	0.445636	FALSE	FALSE
HP	N85	Other noninflammatory disorders of uterus except cervix	FINRISK97	7452	34	29	0.79	0.2171	[0.52, 1.21]	0.286629	0.538431	FALSE	FALSE
HP	N85	Other noninflammatory disorders of uterus except cervix	DILGOM07	4764	21	54	0.98	0.2447	[0.61, 1.58]	0.936038	0.559963	FALSE	FALSE
HP	N87	Dysplasia of cervix uteri	Meta-analysis	12216	57	40	0.99483	0.154834	[0.73, 1.35]	0.973296	0.722313	FALSE	FALSE
HP	N87	Dysplasia of cervix uteri	FINRISK97	7452	29	9	0.51	0.2343	[0.32, 0.81]	0.00406375	0.0490842	FALSE	FALSE
HP	N87	Dysplasia of cervix uteri	DILGOM07	4764	28	31	1.67	0.2063	[1.11, 2.50]	0.0129543	0.0537921	FALSE	FALSE
HP	N92	Excessive frequent and irregular menstruation	Meta-analysis	12216	237	424	0.92	0.0775775	[0.79, 1.07]	0.282457	0.390278	FALSE	FALSE
HP	N92	Excessive frequent and irregular menstruation	FINRISK97	7452	159	183	0.92	0.096	[0.76, 1.11]	0.391632	0.621472	FALSE	FALSE
HP	N92	Excessive frequent and irregular menstruation	DILGOM07	4764	78	241	0.92	0.1317	[0.71, 1.19]	0.531098	0.406281	FALSE	FALSE
HP	N95	Menopausal and other perimenopausal disorders	Meta-analysis	12216	143	116	1.09869	0.100546	[0.90, 1.34]	0.349231	0.41911	FALSE	FALSE
HP	N95	Menopausal and other perimenopausal disorders	FINRISK97	7452	90	42	1.2	0.1258	[0.94, 1.54]	0.141309	0.390127	FALSE	FALSE
HP	N95	Menopausal and other perimenopausal disorders	DILGOM07	4764	53	74	0.94	0.1673	[0.67, 1.30]	0.690279	0.470336	FALSE	FALSE
HP	O00-O08	Pregnancy with abortive outcome	Meta-analysis	12216	206	593	0.927928	0.0812492	[0.79, 1.09]	0.35724	0.420818	FALSE	FALSE
HP	O00-O08	Pregnancy with abortive outcome	FINRISK97	7452	147	312	1.02	0.0952	[0.84, 1.23]	0.853672	0.800996	FALSE	FALSE
HP	O00-O08	Pregnancy with abortive outcome	DILGOM07	4764	59	281	0.72	0.1559	[0.53, 0.97]	0.031921	0.0916608	FALSE	FALSE
HP	O02	Other abnormal products of conception	Meta-analysis	12216	89	137	1.07852	0.118088	[0.86, 1.36]	0.522081	0.533816	FALSE	FALSE
HP	O02	Other abnormal products of conception	FINRISK97	7452	67	61	1.21	0.1355	[0.92, 1.57]	0.168156	0.43099	FALSE	FALSE
HP	O02	Other abnormal products of conception	DILGOM07	4764	22	76	0.75	0.2408	[0.47, 1.20]	0.233642	0.30143	FALSE	FALSE
HP	O04	Medical abortion	Meta-analysis	12216	79	292	0.882151	0.131195	[0.68, 1.14]	0.339189	0.418857	FALSE	FALSE
HP	O04	Medical abortion	FINRISK97	7452	53	158	0.96	0.1578	[0.71, 1.31]	0.813329	0.799883	FALSE	FALSE
HP	O04	Medical abortion	DILGOM07	4764	26	134	0.73	0.2361	[0.46, 1.16]	0.185232	0.265946	FALSE	FALSE
HP	O10-O16	Oedema proteinuria and hypertensive disorders in pregnancy childbirth and the puerperium	Meta-analysis	12216	72	139	1.23471	0.130977	[0.96, 1.60]	0.10746	0.221522	FALSE	FALSE
HP	O10-O16	Oedema proteinuria and hypertensive disorders in pregnancy childbirth and the puerperium	FINRISK97	7452	46	60	1.54	0.1609	[1.12, 2.10]	0.00772865	0.0678916	FALSE	FALSE
HP	O10-O16	Oedema proteinuria and hypertensive disorders in pregnancy childbirth and the puerperium	DILGOM07	4764	26	79	0.8	0.2255	[0.51, 1.24]	0.311844	0.321446	FALSE	FALSE
HP	O20-O29	Other maternal disorders predominantly related to pregnancy	Meta-analysis	12216	149	230	1.23567	0.0936408	[1.03, 1.48]	0.0238336	0.0761542	FALSE	FALSE
HP	O20-O29	Other maternal disorders predominantly related to pregnancy	FINRISK97	7452	95	95	1.38	0.1165	[1.10, 1.73]	0.00612168	0.0611926	FALSE	FALSE
HP	O20-O29	Other maternal disorders predominantly related to pregnancy	DILGOM07	4764	54	135	1.01	0.1574	[0.74, 1.37]	0.960189	0.565989	FALSE	FALSE
HP	O24	Diabetes mellitus in pregnancy	Meta-analysis	12216	77	99	0.987164	0.136802	[0.75, 1.29]	0.924764	0.718504	FALSE	FALSE
HP	O24	Diabetes mellitus in pregnancy	FINRISK97	7452	51	41	0.96	0.1695	[0.69, 1.33]	0.792013	0.796421	FALSE	FALSE
HP	O24	Diabetes mellitus in pregnancy	DILGOM07	4764	26	58	1.04	0.2317	[0.66, 1.63]	0.874103	0.542279	FALSE	FALSE
HP	O30-O48	Maternal care related to the foetus and amniotic cavity and possible delivery problems	Meta-analysis	12216	277	619	1.01445	0.0678973	[0.89, 1.16]	0.832605	0.670096	FALSE	FALSE
HP	O30-O48	Maternal care related to the foetus and amniotic cavity and possible delivery problems	FINRISK97	7452	180	288	1.09	0.0833	[0.92, 1.28]	0.307245	0.569471	FALSE	FALSE
HP	O30-O48	Maternal care related to the foetus and amniotic cavity and possible delivery problems	DILGOM07	4764	97	331	0.88	0.1172	[0.70, 1.11]	0.287852	0.314053	FALSE	FALSE
HP	O42	Premature rupture of membranes	Meta-analysis	12216	44	68	0.851015	0.176594	[0.60, 1.20]	0.360959	0.422479	FALSE	FALSE
HP	O42	Premature rupture of membranes	FINRISK97	7452	23	27	0.78	0.2486	[0.48, 1.27]	0.324545	0.584352	FALSE	FALSE
HP	O42	Premature rupture of membranes	DILGOM07	4764	21	41	0.93	0.2509	[0.57, 1.53]	0.788334	0.503043	FALSE	FALSE
HP	O47	False labour	Meta-analysis	12216	102	217	1.00997	0.11094	[0.81, 1.26]	0.928725	0.718895	FALSE	FALSE
HP	O47	False labour	FINRISK97	7452	66	100	1.04	0.1349	[0.80, 1.35]	0.773496	0.796421	FALSE	FALSE
HP	O47	False labour	DILGOM07	4764	36	117	0.95	0.195	[0.65, 1.39]	0.788283	0.503043	FALSE	FALSE
HP	O60-O75	Complications of labour and delivery	Meta-analysis	12216	190	427	1.00331	0.080755	[0.86, 1.18]	0.967324	0.722313	FALSE	FALSE
HP	O60-O75	Complications of labour and delivery	FINRISK97	7452	131	189	1.06	0.0962	[0.88, 1.28]	0.523043	0.70522	FALSE	FALSE
HP	O60-O75	Complications of labour and delivery	DILGOM07	4764	59	238	0.88	0.1486	[0.66, 1.17]	0.379856	0.357983	FALSE	FALSE
HP	O68	Labour and delivery complicated by foetal stress [distress]	Meta-analysis	12216	61	100	1.03012	0.142331	[0.78, 1.36]	0.834838	0.670096	FALSE	FALSE
HP	O68	Labour and delivery complicated by foetal stress [distress]	FINRISK97	7452	37	44	1.05	0.1825	[0.74, 1.51]	0.775326	0.796421	FALSE	FALSE
HP	O68	Labour and delivery complicated by foetal stress [distress]	DILGOM07	4764	24	56	1	0.2274	[0.64, 1.57]	0.988578	0.570248	FALSE	FALSE
HP	O80-O84	Delivery	Meta-analysis	12216	531	1310	0.985795	0.0487683	[0.90, 1.08]	0.769246	0.654861	FALSE	FALSE
HP	O80-O84	Delivery	FINRISK97	7452	360	671	1.03	0.0583	[0.92, 1.16]	0.577306	0.717393	FALSE	FALSE
HP	O80-O84	Delivery	DILGOM07	4764	171	639	0.89	0.089	[0.75, 1.06]	0.197831	0.27424	FALSE	FALSE
HP	O80	Single spontaneous delivery	Meta-analysis	12216	435	1247	0.981812	0.0541102	[0.88, 1.09]	0.734446	0.63689	FALSE	FALSE
HP	O80	Single spontaneous delivery	FINRISK97	7452	291	653	1.02	0.0649	[0.90, 1.16]	0.746991	0.7843	FALSE	FALSE
HP	O80	Single spontaneous delivery	DILGOM07	4764	144	594	0.9	0.098	[0.74, 1.09]	0.279284	0.310151	FALSE	FALSE
HP	O82	Single delivery by Caesarean section	Meta-analysis	12216	84	60	0.98994	0.124105	[0.78, 1.26]	0.935065	0.718895	FALSE	FALSE
HP	O82	Single delivery by Caesarean section	FINRISK97	7452	62	15	1.03	0.1435	[0.78, 1.36]	0.838604	0.800996	FALSE	FALSE
HP	O82	Single delivery by Caesarean section	DILGOM07	4764	22	45	0.88	0.2472	[0.54, 1.43]	0.600357	0.43098	FALSE	FALSE
HP	O95-O99	Other obstetric conditions not elsewhere classified	Meta-analysis	12216	57	55	1.07727	0.140162	[0.82, 1.42]	0.595388	0.578679	FALSE	FALSE
HP	O95-O99	Other obstetric conditions not elsewhere classified	FINRISK97	7452	36	16	1.19	0.1683	[0.85, 1.65]	0.310386	0.569471	FALSE	FALSE
[truncated: 2,487 more rows]
