# Supplementary material for: Elevated serum alpha-1 antitrypsin is a major component of GlycA-associated risk for future morbidity and mortality
Source: PLoS One. 2019 Oct 23;14(10):e0223692. doi: 10.1371/journal.pone.0223692 (PMC6808431; doi:10.1371/journal.pone.0223692)
Supplement: S4 Table — Immunoassayed: Spearman correlation between GlycA and each immunoassayed glycoprotein in the 626 DILGOM07 participants with matched immunoassay and NMR-metabolite measures. Training: Spearman correlation between GlycA and the imputed glycoprotein levels in the 615 DILGOM07 participants used for model training. DILGOM07: Spearman correlation between GlycA and the imputed glycoprotein levels in all 4,540 DILGOM07 participants. FINRISK97: Spearman correlation between GlycA and the imputed glycoprotein levels in all 7,321 FINRISK97 participants. (XLSX) [file pone.0223692.s008.xlsx]

## Sheet: S5 Table
Glycoprotein	Immunoassayed	Training	DILGOM07	FINRISK97
AAT	0.31	0.54	0.44	0.71
HP	0.59	0.84	0.82	0.82
AGP	0.65	0.85	0.83	0.83
TF	0.28	-	-	-
