# Supplementary material for: Elevated serum alpha-1 antitrypsin is a major component of GlycA-associated risk for future morbidity and mortality
Source: PLoS One. 2019 Oct 23;14(10):e0223692. doi: 10.1371/journal.pone.0223692 (PMC6808431; doi:10.1371/journal.pone.0223692)
Supplement: S6 Table — The tested gene coexpression network modules are those that were previously identified in DILGOM07 and found to topologically replicate in an independent cohort study in reference [34]. References are given next to module names referring to the study in which they were first characterised. Modules without references are those first characterised here based on GO term enrichment shown in S7 Table. Linear regression models were fit between log-transformed AAT and each modules summary expression profile (first principal component) adjusting for participant age and sex. Modules were given numeric labels in descending order of module size (40 modules were identified, 20 were found to be topologically replicable). Effect size indicates the change in standard deviations of immunoassayed AAT conferred per standard deviation increase of each module’s coordinated expression adjusting for participant age and sex. 95% CI indicates the 95% confidence interval for the effect size. An association was considered significant (top three modules) where its P-value < 0.0025 (0.05/20, Bonferroni correcting for the total number of modules tested). (XLSX) [file pone.0223692.s010.xlsx]

## Sheet: S7 Table
Module	Name	Genes	Effect size	95% CI	P-value
6	General immune module A [34]	1019	0.17	[0.084, 0.25]	1x10-4
10	General immune module B [34]	339	0.15	[0.066, 0.24]	7x10-4
5	RNA processing module	1734	-0.14	[-0.23, -0.056]	0.001
22	B cell activity module [34]	67	-0.13	[-0.22, -0.046]	0.003
29	Neutrophil module [15]	31	0.11	[0.019, 0.20]	0.02
14	General signal response module	225	0.1	[0.013, 0.19]	0.02
16	Cytotoxic cell-like module [34]	179	-0.098	[-0.19, -0.0073]	0.03
18	Viral response module [34]	112	0.089	[0.0026, 0.17]	0.04
7	General cellular metabolism module C	604	-0.083	[-0.17, 0.0059]	0.07
26	Mitochondrial module	40	-0.071	[-0.16, 0.015]	0.1
12	Mast cell module	255	-0.065	[-0.15, 0.024]	0.2
27	Bacterial peptide response module	39	0.064	[-0.024, 0.15]	0.2
9	General cellular metabolism module D	545	-0.049	[-0.14, 0.037]	0.3
33	Protein lipidation module	28	0.045	[-0.042, 0.13]	0.3
38	Lipid leukocyte module [32,33]	15	0.031	[-0.055, 0.12]	0.5
23	Hydroxy compound catabolism module	64	-0.024	[-0.11, 0.062]	0.6
2	General cellular metabolism module A	5403	0.011	[-0.078, 0.099]	0.8
4	General cellular metabolism module B	1775	-0.008	[-0.096, 0.080]	0.9
17	Platelet module [34]	138	-0.005	[-0.092, 0.082]	0.9
13	General transcription and translation module	239	-0.0038	[-0.091, 0.083]	0.9
