# Supplementary material for: Elevated serum alpha-1 antitrypsin is a major component of GlycA-associated risk for future morbidity and mortality
Source: PLoS One. 2019 Oct 23;14(10):e0223692. doi: 10.1371/journal.pone.0223692 (PMC6808431; doi:10.1371/journal.pone.0223692)
Supplement: S8 Table — The tested network modules are those identified by Li et al. in reference [35]. “size”: number of genes in the module. “in array”: number of genes that could be mapped to the Illumina HT12 array used in DILGOM07. Linear regression models were fit between log-transformed AAT and each modules summary expression profile (first principal component) adjusting for participant age and sex in the 518 DILGOM07 participants with matched gene expression and AAT immunoassay data. “beta”: change in standard deviations of immunoassayed AAT conferred per standard deviation increase of each module’s coordinated expression adjusting for participant age and sex. L95 and U95: lower and upper bounds of the 95% confidence interval. (XLSX) [file pone.0223692.s012.xlsx]

## Sheet: S9 Table
Module	Name	Size	In array	Beta	L95	U95	P-value
M37.0	immune activation - generic cluster	347	310	0.229947	0.145791	0.314104	1.20715e-07
M37.1	enriched in neutrophils (I)	52	49	0.221219	0.137113	0.305326	3.40406e-07
M16	TLR and inflammatory signaling	45	40	0.217992	0.133359	0.302624	5.83859e-07
M59	CCR1, 7 and cell signaling	10	10	0.214716	0.129922	0.29951	8.92297e-07
M118.0	enriched in monocytes (IV)	57	51	0.208214	0.124174	0.292254	1.50688e-06
M119	enriched in activated dendritic cells (I)	11	11	0.208506	0.124276	0.292736	1.53767e-06
M43.1	myeloid, dendritic cell activation via NFkB (II)	14	14	0.205232	0.121052	0.289412	2.18851e-06
M73	enriched in monocytes (III)	12	12	0.201571	0.117276	0.285866	3.37939e-06
M25	TLR8-BAFF network	10	8	0.199037	0.114877	0.283196	4.30031e-06
M132	recruitment of neutrophils	11	10	0.197913	0.113235	0.28259	5.53349e-06
M140	extracellular matrix, complement	14	12	0.197055	0.112479	0.281631	5.91282e-06
M2.1	extracellular matrix (II)	45	43	0.200528	0.111145	0.28991	1.27361e-05
M160	leukocyte differentiation	16	14	0.188559	0.102441	0.274676	2.03037e-05
M155	G protein coupled receptors cluster	10	10	0.184247	0.099842	0.268652	2.14928e-05
M70.1	TBA	10	9	0.185944	0.100736	0.271153	2.16165e-05
M114.1	glycerophospholipid metabolism	11	11	0.184301	0.0997034	0.268898	2.23008e-05
M3	regulation of signal transduction	47	42	0.183381	0.0989967	0.267764	2.33486e-05
M70.0	TBA	20	17	0.183315	0.0987541	0.267876	2.4429e-05
S4	Monocyte surface signature	94	91	0.183566	0.0986161	0.268516	2.59159e-05
M87	transmembrane transport (I)	24	24	0.183032	0.0973595	0.268705	3.18468e-05
M55	TBA	12	12	0.176732	0.0918624	0.261602	4.9846e-05
M11.0	enriched in monocytes (II)	189	172	0.176348	0.0910792	0.261618	5.601e-05
M71	enriched in antigen presentation (I)	18	17	0.174518	0.0896902	0.259347	6.11668e-05
M31	cell cycle and growth arrest	12	11	0.173269	0.0884445	0.258093	6.88629e-05
M11.2	formyl peptide receptor mediated neutrophil response	10	9	0.172198	0.0872694	0.257127	7.77724e-05
M81	enriched in myeloid cells and monocytes	35	34	0.172099	0.086844	0.257354	8.3529e-05
M48	TBA	13	13	0.169797	0.0851803	0.254415	9.19006e-05
M118.1	enriched in monocytes (surface)	17	15	0.170463	0.0854733	0.255452	9.26077e-05
M9	B cell development	11	11	0.169294	0.0842444	0.254343	0.000104425
M40	complement and other receptors in DCs	13	11	0.166978	0.0823261	0.25163	0.000120323
M105	TBA	18	17	0.169973	0.0820158	0.257931	0.000164284
M43.0	myeloid, dendritic cell activation via NFkB (I)	15	15	-0.174452	-0.266079	-0.0828243	0.000204374
M163	enriched in neutrophils (II)	14	13	0.160742	0.0757872	0.245698	0.000223591
M50	CD1 and other DC receptors	10	9	0.159603	0.0746119	0.244594	0.000248883
M5.0	regulation of antigen presentation and immune response	81	74	0.164591	0.0769124	0.25227	0.000250147
M56	suppression of MAPK signaling	12	12	0.159001	0.0741904	0.243811	0.00025475
M23	RA, WNT, CSF receptors network (monocyte)	12	11	0.157094	0.0723139	0.241874	0.000299873
M64	enriched in activated dendritic cells/monocytes	17	15	0.15512	0.0699108	0.24033	0.000381198
M53	inflammasome receptors and signaling	12	12	0.153107	0.0669625	0.239252	0.000521251
M109	receptors, cell migration	15	14	0.150889	0.0652648	0.236513	0.000580759
M11.1	blood coagulation	22	22	0.149356	0.0644017	0.234311	0.000598194
M112.0	complement activation (I)	17	17	0.158224	0.0672696	0.249178	0.00068187
M198	TBA	12	9	0.148169	0.0628949	0.233443	0.000691723
M200	antigen processing and presentation	11	7	-0.147071	-0.233279	-0.0608624	0.000862683
M57	immuregulation - monocytes, T and B cells	13	12	-0.145706	-0.231244	-0.0601686	0.000878232
M60	lymphocyte generic cluster	17	16	-0.145307	-0.230698	-0.0599162	0.000888933
S7	CD4 T cell surface signature Th2-stimulated	13	11	0.155265	0.0633773	0.247153	0.000965384
M20	AP-1 transcription factor network	15	15	0.143312	0.0580044	0.228619	0.00103246
M126	double positive thymocytes	13	10	-0.149308	-0.238599	-0.0600175	0.00108899
M121	TBA	12	9	-0.14976	-0.239517	-0.0600027	0.00111648
M33	inflammatory response	11	10	0.143879	0.0575796	0.230179	0.0011264
S11	Activated (LPS) dendritic cell surface signature	37	34	0.143023	0.0562698	0.229776	0.00127765
M111.0	viral sensing & immunity; IRF2 targets network (I)	17	15	0.141503	0.05558	0.227426	0.00129293
M120	TBA	11	10	-0.13664	-0.222704	-0.0505758	0.00191589
M13	innate activation by cytosolic DNA sensing	11	11	0.135324	0.0500426	0.220605	0.00192669
M18	T cell differentiation via ITK and PKC	11	9	-0.139082	-0.227115	-0.0510484	0.00201567
M117	cell adhesion (GO)	21	18	-0.138709	-0.226857	-0.050562	0.0020996
M44	T cell signaling and costimulation	10	10	-0.140774	-0.232148	-0.0493991	0.00259644
M47.4	enriched in B cells (V)	11	11	-0.131148	-0.216748	-0.0455488	0.00274101
M79	TBA	10	10	0.132648	0.045297	0.219999	0.00298661
M47.2	enriched in B cells (III)	37	21	-0.129505	-0.214839	-0.0441717	0.00300408
M215	small GTPase mediated signal transduction	16	14	0.128627	0.043116	0.214137	0.00326832
M7.0	enriched in T cells (I)	62	52	-0.129277	-0.215428	-0.0431258	0.00334347
M47.0	enriched in B cells (I)	53	43	-0.126636	-0.21194	-0.0413307	0.00369516
M37.2	endoplasmic reticulum	19	15	0.131394	0.0418903	0.220898	0.00409029
M69	enriched in B cells (VI)	20	20	-0.124446	-0.209845	-0.0390472	0.00436966
M92	lipid metabolism, endoplasmic reticulum	10	10	0.126565	0.038916	0.214214	0.00473573
M67	activated dendritic cells	12	11	0.122918	0.0376519	0.208184	0.0048055
M52	T cell activation (IV)	13	13	-0.122659	-0.207917	-0.0374013	0.00489037
M84	integrins and cell adhesion	10	10	0.125147	0.0380451	0.212249	0.00494666
M47.1	enriched in B cells (II)	43	33	-0.11686	-0.202172	-0.0315473	0.00735439
M125	TBA	11	10	0.120305	0.0316209	0.208988	0.00793902
M165	enriched in activated dendritic cells (II)	35	33	0.115835	0.0303732	0.201296	0.00799203
M188	TBA	10	9	0.116948	0.0303691	0.203527	0.00820792
M61.2	enriched in NK cells (receptor activation)	16	12	-0.116385	-0.202708	-0.0300624	0.00832704
M157	enriched in NK cells (III)	14	11	-0.115988	-0.202155	-0.0298209	0.00843133
S0	T cell surface signature	27	24	-0.125192	-0.218992	-0.0313911	0.00899927
M111.1	viral sensing & immunity; IRF2 targets network (II)	11	10	0.113137	0.0272605	0.199013	0.00992015
M42	platelet activation (III)	10	10	0.112551	0.0267557	0.198346	0.0102363
M47.3	enriched in B cells (IV)	16	10	-0.110461	-0.19605	-0.0248725	0.0115236
M7.2	enriched in NK cells (I)	49	45	-0.113508	-0.202127	-0.0248884	0.0121616
M7.3	T cell activation (II)	31	27	-0.109009	-0.194767	-0.0232503	0.012829
M49	transcription regulation in cell development	47	42	0.109989	0.0227566	0.197221	0.013566
M5.1	T cell activation and signaling	25	21	-0.107206	-0.193108	-0.0213038	0.0145457
M100	MAPK, RAS signaling	10	9	0.108725	0.0216049	0.195844	0.0145464
M4.5	mitotic cell cycle in stimulated CD4 T cells	35	32	0.107593	0.0211888	0.193997	0.0147646
M58	B cell development/activation	11	10	0.10589	0.0202611	0.19152	0.0154638
M32.4	CORO1A-DEF6 network (II)	15	15	0.111164	0.0212593	0.201068	0.015476
M62.0	T & B cell development, activation	44	37	-0.116023	-0.210454	-0.0215928	0.0161348
M61.0	enriched in NK cells (II)	24	19	-0.108199	-0.197157	-0.0192411	0.0172298
M4.13	cell junction (GO)	11	11	0.104234	0.0174793	0.190989	0.0186271
M7.1	T cell activation (I)	50	45	-0.105011	-0.192903	-0.0171195	0.0192909
M4.10	cell cycle (II)	14	12	0.103802	0.0162913	0.191312	0.0201751
M156.1	plasma cells, immunoglobulins	36	9	0.102071	0.0153766	0.188766	0.0211144
M212	purine nucleotide biosynthesis	12	11	-0.100285	-0.186896	-0.0136736	0.0233323
M91	adhesion and migration, chemotaxis	13	12	-0.105535	-0.198369	-0.0127001	0.0259552
M114.0	TBA	39	37	0.103384	0.0112063	0.195562	0.0280072
M113	golgi membrane (I)	10	7	0.0983085	0.0102757	0.186341	0.0286889
M235	mitochondrial cluster	19	15	-0.0961372	-0.182423	-0.00985169	0.0290534
M127	type I interferon response	12	11	0.0954291	0.00976186	0.181096	0.0290857
M181	nucleotide metabolism	10	9	-0.0969169	-0.183981	-0.00985252	0.0291991
M36	T cell surface, activation	12	11	-0.0958004	-0.182099	-0.00950226	0.0296426
M65	IL2, IL7, TCR network	12	8	-0.102574	-0.1958	-0.00934764	0.0311118
M7.4	T cell activation (III)	14	12	-0.0973371	-0.186297	-0.00837716	0.0320536
M150	innate antiviral response	12	12	0.0936231	0.00796577	0.179281	0.0322374
M146	MHC-TLR7-TLR8 cluster	17	14	-0.0938293	-0.179911	-0.00774733	0.0327112
M245	translation initiation factor 3 complex	13	10	-0.0947499	-0.181717	-0.00778315	0.0327914
M54	BCR signaling	12	10	0.092132	0.00653888	0.177725	0.0349384
M130	enriched in G-protein coupled receptors	10	10	-0.0973487	-0.189124	-0.00557317	0.0376633
M95.0	enriched in antigen presentation (II)	24	21	-0.0952927	-0.18548	-0.00510594	0.0384076
M6	mitotic cell division	32	28	0.090951	0.00305786	0.178844	0.042572
M45	leukocyte activation and migration	11	10	-0.0929845	-0.183141	-0.00282858	0.0432574
M139	lysosomal/endosomal proteins	11	10	0.0882289	0.00191306	0.174545	0.0451519
M68	RIG-1 like receptor signaling	10	10	0.0870506	0.00142477	0.172676	0.0463215
M32.3	KLF12 targets network	17	17	0.0896813	0.00129439	0.178068	0.0467501
M4.2	PLK1 signaling events	34	33	0.0871092	-0.00119736	0.175416	0.0531764
M14	T cell differentiation	12	11	-0.0909255	-0.184266	0.00241473	0.0562052
M24	cell activation (IL15, IL23, TNF)	15	15	0.0898135	-0.00358256	0.18321	0.0594235
M93	TBA	10	10	-0.0869986	-0.178692	0.00469481	0.0628915
M136	TBA	17	17	0.083127	-0.00455645	0.17081	0.0631029
M75	antiviral IFN signature	22	21	0.0800398	-0.00562498	0.165705	0.0669959
M35.0	signaling in T cells (I)	14	14	-0.0887483	-0.184299	0.00680256	0.0686229
M4.0	cell cycle and transcription	335	299	0.0808402	-0.00710125	0.168782	0.071511
M4.3	myeloid cell enriched receptors and transporters	31	28	0.0799486	-0.00837779	0.168275	0.0759542
M156.0	plasma cells & B cells, immunoglobulins	43	21	-0.0781632	-0.16561	0.00928369	0.0796802
M223	enriched in T cells (II)	13	9	-0.0796852	-0.169456	0.0100853	0.0817782
M46	cell division stimulated CD4+ T cells	28	25	0.0772593	-0.0115326	0.166051	0.0879763
M8	E2F transcription factor network	18	16	0.0779338	-0.0117391	0.167607	0.0883506
M152.1	TBA (source: naive B cells)	21	14	0.0763743	-0.0126815	0.16543	0.0926276
M19	T cell differentiation (Th2)	17	16	-0.0769091	-0.16663	0.012812	0.092779
M95.1	enriched in antigen presentation (III)	15	13	-0.078176	-0.169385	0.0130326	0.0928133
M244	TBA	13	10	-0.0777216	-0.169279	0.0138356	0.0959819
M248	TBA	11	7	-0.0719302	-0.157805	0.0139448	0.100463
M102	TBA	12	9	-0.0714471	-0.157753	0.0148586	0.104486
M35.1	signaling in T cells (II)	11	11	-0.0783547	-0.173046	0.0163364	0.104637
M72.2	TBA	12	10	0.0708764	-0.0169029	0.158656	0.113289
M32.1	platelet activation (II)	21	19	0.0717406	-0.0173769	0.160858	0.114375
M184.1	TBA	11	10	-0.0706791	-0.16127	0.0199122	0.125948
S1	NK cell surface signature	48	42	-0.0720836	-0.166002	0.0218345	0.132207
M190	TBA	11	10	-0.0655691	-0.15201	0.0208721	0.13678
M41.0	TBA	17	13	-0.0659305	-0.153593	0.0217319	0.140138
M39	integrin mediated leukocyte migration	10	9	0.0690129	-0.0229	0.160926	0.140794
M220	TBA	10	9	0.0683904	-0.0230141	0.159795	0.14219
M242	TBA	11	8	0.0641876	-0.021933	0.150308	0.143736
M247	enriched in nuclear pore complex interacting proteins	14	9	-0.0638362	-0.150664	0.0229911	0.14924
M207	TBA	10	10	-0.0649544	-0.153597	0.0236886	0.150595
M78	myeloid cell cytokines, metallopeptidases and laminins	11	11	-0.0668084	-0.158307	0.02469	0.152048
M218	TBA	15	12	-0.06322	-0.151241	0.0248009	0.158836
M168	enriched in dendritic cells	19	19	0.0656853	-0.0259522	0.157323	0.159674
M186	TBA	11	9	-0.0653907	-0.156659	0.0258774	0.159864
M32.0	platelet activation (I)	23	21	0.0622007	-0.0267924	0.151194	0.170311
M236	TBA	14	13	-0.0614187	-0.149531	0.0266936	0.171467
M34	cytoskeletal remodeling (enriched for SRF targets)	10	10	0.0616408	-0.0277762	0.151058	0.176231
M123	enriched in B cell differentiation	13	11	-0.0607827	-0.149275	0.0277097	0.177797
M246	TBA	16	6	0.0591996	-0.0269907	0.14539	0.177811
M4.12	C-MYC transcriptional network	12	11	0.0598427	-0.0289538	0.148639	0.186092
M112.1	complement activation (II)	10	10	-0.0612205	-0.153904	0.0314629	0.19498
M21	cell adhesion (lymphocyte homing)	10	10	0.0582711	-0.0299717	0.146514	0.195104
M62.1	enriched for unknown TF motif CTCNANGTGNY	12	9	-0.0569848	-0.144795	0.0308258	0.202912
M141	TBA	27	21	0.0585969	-0.0323947	0.149588	0.206387
M80	TBA	20	18	0.0571057	-0.032807	0.147018	0.212688
M240	chromosome Y linked	17	2	-0.054323	-0.140246	0.0316002	0.214778
M170	TBA	12	11	-0.0560314	-0.145678	0.0336151	0.220039
M214	TBA	12	10	-0.0558919	-0.145465	0.0336814	0.220811
M38	chemokines and receptors	11	11	-0.0573807	-0.149994	0.0352326	0.224084
M4.1	cell cycle (I)	145	133	0.0530195	-0.0365159	0.142555	0.245224
M129	inositol phosphate metabolism	13	9	0.0514506	-0.0356035	0.138505	0.246136
M76	DNA repair	22	22	-0.0532901	-0.143603	0.0370223	0.246899
M4.8	cell division - E2F transcription network	19	17	-0.0517167	-0.139919	0.0364856	0.249889
M110	axon guidance	10	10	-0.0533727	-0.145379	0.0386334	0.254959
M37.3	cell division	10	10	-0.0504031	-0.13949	0.0386841	0.266868
M182	enriched in DNA interacting proteins	16	14	-0.0497318	-0.138436	0.038972	0.271217
M152.2	TBA (source: memory B cells)	18	13	0.0501719	-0.0396673	0.140011	0.273089
M152.0	TBA (source: B cells)	25	19	0.0500248	-0.0404218	0.140471	0.277728
M10.0	E2F1 targets (Q3)	33	32	0.05007	-0.0418632	0.142003	0.285129
M4.11	mitotic cell cycle in stimulated CD4 T cells	12	9	0.048029	-0.0405749	0.136633	0.287406
M210	extracellular matrix, collagen	32	31	-0.049159	-0.140759	0.0424411	0.292225
M227	translation initiation	10	10	-0.0467435	-0.135249	0.0417623	0.299954
M4.14	Rho GTPase cycle	10	9	0.0479908	-0.0432287	0.13921	0.301821
M232	enriched for TF motif TNCATNTCCYR	13	12	-0.0469166	-0.137188	0.0433549	0.30771
M98.1	TBA	10	9	-0.0466944	-0.137002	0.0436129	0.310196
M106.0	nuclear pore complex	17	17	0.0451397	-0.0424658	0.132745	0.311882
M0	targets of FOSL1/2	12	12	0.0450573	-0.0430098	0.133124	0.315306
M144	cell cycle, ATP binding	16	15	0.0457029	-0.0436954	0.135101	0.315681
M145.1	cytoskeleton/actin (SRF transcription targets)	14	14	0.0442094	-0.0425614	0.13098	0.317321
M106.1	nuclear pore complex (mitosis)	11	10	0.0445368	-0.0430079	0.132081	0.318047
M88.1	enriched in hepatocyte nuclear factors (I)	13	10	0.0457545	-0.0444561	0.135965	0.319508
M66	TBA	17	14	0.0445121	-0.0432929	0.132317	0.31975
M90	TBA	12	12	-0.0457481	-0.13623	0.0447339	0.321029
M32.7	TBA	11	9	-0.0451162	-0.135232	0.0449994	0.325791
M29	proinflammatory cytokines and chemokines	10	8	0.0450791	-0.0453843	0.135543	0.32805
M4.6	cell division in stimulated CD4 T cells	20	19	0.0433212	-0.0474217	0.134064	0.348733
M225	metabolism of steroids	10	8	0.041053	-0.047045	0.129151	0.360367
M89.1	putative targets of PAX3	10	10	-0.0407609	-0.128295	0.0467731	0.360712
S5	DC surface signature	82	76	0.0432584	-0.0505072	0.137024	0.365172
M201	TBA	18	15	0.0400184	-0.0482508	0.128288	0.373516
S6	CD4 T cell surface signature Th1-stimulated	9	8	-0.0424356	-0.13705	0.0521787	0.378653
M88.2	enriched in hepatocyte nuclear factors (II)	12	9	0.0403033	-0.0497631	0.13037	0.379745
M217	TBA (source: B cells)	10	8	-0.039968	-0.129846	0.0499099	0.382723
M2.0	extracellular matrix (I)	30	28	-0.0408022	-0.132714	0.0511093	0.383539
M159	G protein mediated calcium signaling	10	10	0.0398599	-0.0501301	0.12985	0.384603
M234	transcription elongation, RNA polymerase II	14	10	-0.0388607	-0.126785	0.0490638	0.385632
M178	enriched for promoter motif NATCACGTGAY (putative SREBF1 targets)	10	9	0.0399263	-0.0507555	0.130608	0.387447
M116	TBA	13	12	-0.0387466	-0.128224	0.0507307	0.395314
M4.7	mitotic cell cycle	21	20	0.0396375	-0.0520633	0.131338	0.396171
M115	cytokines - recepters cluster	11	11	0.0400665	-0.0534406	0.133574	0.400292
M177.1	TBA	15	12	-0.0388103	-0.129567	0.0519465	0.401233
M179	enriched for TF motif PAX3	10	10	-0.0368921	-0.123344	0.0495595	0.402216
M192	TBA	12	11	0.037199	-0.0506521	0.12505	0.405868
M4.15	enriched in monocytes (I)	11	11	0.039371	-0.0536499	0.132392	0.406071
M151	TBA	10	10	-0.037067	-0.12506	0.0509256	0.408289
M149	TBA	10	9	-0.0376067	-0.127141	0.0519276	0.409654
M239	enriched in calcium signaling proteins	15	10	-0.0376872	-0.127718	0.052344	0.411242
M237	golgi membrane (II)	17	15	0.0359317	-0.0505156	0.122379	0.414547
M88.0	leukocyte migration	51	41	0.0384391	-0.0541304	0.131009	0.414999
M26.0	TBA	30	25	-0.0376204	-0.129515	0.0542739	0.421608
M148	TBA	11	11	0.0349972	-0.0519922	0.121987	0.429668
M17.1	Hox cluster II	12	11	0.0349199	-0.0527296	0.122569	0.434164
M241	TBA	10	7	-0.0347205	-0.122716	0.0532752	0.438596
M32.6	TBA	13	13	0.0352587	-0.0554158	0.125933	0.44526
M128	TBA	12	12	0.033336	-0.0536081	0.12028	0.451638
M224	transmembrane and ion transporters (II)	11	9	-0.034386	-0.124999	0.0562272	0.456295
M17.3	Hox cluster IV	10	10	-0.03278	-0.120395	0.0548348	0.462658
M191	transmembrane transport (II)	18	16	-0.032269	-0.119087	0.0545488	0.465593
M161	TBA	14	12	0.0323093	-0.0556802	0.120299	0.470999
M99	TBA	10	9	-0.0313322	-0.119357	0.0566929	0.484688
M180	TBA	11	10	0.0307034	-0.0555839	0.116991	0.484834
M196	platelet activation - actin binding	17	15	0.0307562	-0.0561371	0.11765	0.487135
M17.2	Hox cluster III	12	12	0.0312926	-0.0583368	0.120922	0.493083
M143	nuclear pore, transport; mRNA splicing, processing	11	10	0.0304627	-0.0576034	0.118529	0.497085
M32.5	TBA	15	15	0.0307004	-0.0587689	0.12017	0.500534
M219	respiratory electron transport chain (mitochondrion)	18	15	-0.0295258	-0.116311	0.0572591	0.504185
M72.1	TBA	17	15	0.0294147	-0.0570739	0.115903	0.504335
M211	TBA	11	11	-0.0297771	-0.117382	0.0578276	0.50458
M216	respiratory electron transport chain (mitochondrion)	12	10	0.0296577	-0.0580626	0.117378	0.50685
M103	cell cycle (III)	51	47	0.03031	-0.0597848	0.120405	0.508951
M249	TBA	10	8	0.0299391	-0.0601687	0.120047	0.514207
M158.1	interferon alpha response (II)	13	13	0.029916	-0.0604692	0.120301	0.515824
M169	mitosis (TF motif CCAATNNSNNNGCG)	16	14	-0.0281818	-0.114628	0.0582643	0.522156
M230	cell cycle, mitotic phase	12	11	-0.0287902	-0.117407	0.059827	0.523588
M238	respiratory electron transport chain (mitochondrion)	17	14	-0.0279365	-0.114306	0.0584329	0.525415
M41.3	TBA	10	8	-0.0292944	-0.120332	0.0617427	0.527552
M205	TBA	11	11	-0.0273824	-0.114117	0.059352	0.535382
M83	enriched in naive and memory B cells	10	10	-0.0292185	-0.122026	0.0635892	0.536514
M208	TBA	10	9	-0.0274952	-0.11506	0.0600696	0.537588
M107	Hox cluster VI	11	10	-0.0271478	-0.114892	0.0605967	0.543564
M226	proteasome	12	12	0.026545	-0.0603763	0.113466	0.548791
M231	respiratory electron transport chain (mitochondrion)	11	10	-0.0262409	-0.112496	0.0600139	0.550318
M108	TBA	11	9	-0.0272292	-0.117031	0.0625726	0.551643
M82	signal transduction, plasma membrane	13	13	-0.0271707	-0.118894	0.0645524	0.560848
M86.1	proinflammatory dendritic cell, myeloid cell response	13	12	0.0269517	-0.0654179	0.119321	0.56674
M77	collagen, TGFB family et al	35	34	-0.0261944	-0.116822	0.0644335	0.570398
M72.0	TBA	24	20	0.0247926	-0.0619632	0.111548	0.574749
M41.2	TBA	14	11	0.0247857	-0.0637942	0.113366	0.582753
S3	Plasma cell surface signature	24	23	-0.0250635	-0.115575	0.0654479	0.586668
M17.0	Hox cluster I	16	14	-0.0239736	-0.111924	0.063977	0.59253
M51	cell adhesion	38	36	0.0233538	-0.0636938	0.110401	0.598368
M233	TBA	15	13	0.0245724	-0.0675873	0.116732	0.600632
M204.1	chaperonin mediated protein folding (II)	10	9	0.0232918	-0.0641926	0.110776	0.601164
M133.0	cell adhesion, membrane	14	12	-0.0244166	-0.116176	0.0673431	0.601363
M197	TBA	14	13	-0.0233443	-0.114463	0.0677743	0.614954
M243	TBA	12	10	-0.0207308	-0.106861	0.0653989	0.636512
M41.1	TBA	15	10	-0.0216614	-0.112175	0.0688519	0.638439
M195	muscle contraction, SRF targets	12	10	-0.0208262	-0.108873	0.0672207	0.642346
M171	heme biosynthesis (I)	11	7	0.0206796	-0.0668844	0.108244	0.642866
M153	TBA	16	14	0.0210435	-0.0692233	0.11131	0.647149
M2.2	extracellular matrix (III)	14	14	-0.0209674	-0.111562	0.069627	0.649524
M145.0	cytoskeleton/actin (SRF transcription targets)	16	16	-0.0205959	-0.111577	0.0703855	0.6567
M63	regulation of localization (GO)	12	10	0.0201416	-0.0693175	0.109601	0.65844
M162.0	plasma membrane, cell junction	18	15	-0.0199447	-0.110733	0.0708435	0.666222
M74	transcriptional targets of glucocorticoid receptor	12	8	0.0199933	-0.0719778	0.111964	0.669504
M104	TBA	10	8	-0.0185418	-0.105763	0.0686793	0.676385
M101	phosphatidylinositol signaling system	14	11	0.0178598	-0.0692537	0.104973	0.687281
M250	spliceosome	12	11	-0.0176366	-0.104001	0.0687279	0.688445
M183	TBA	10	10	0.0184497	-0.0728372	0.109737	0.69149
M142	transmembrane and ion transporters (I)	13	10	0.018152	-0.0726984	0.109002	0.694831
M167	enriched in cell cycle	15	14	-0.0174065	-0.10612	0.0713075	0.700049
M229	TBA	11	10	-0.0171425	-0.104846	0.0705607	0.701138
M27.0	chemokine cluster (I)	26	26	-0.0175826	-0.109463	0.0742973	0.707106
M61.1	enriched in NK cells (KIR cluster)	13	7	-0.0168895	-0.106846	0.0730669	0.712387
M164	xenobiotic metabolism	10	9	0.0165924	-0.0729477	0.106133	0.715968
M175	cell development	13	13	0.0167499	-0.0737036	0.107203	0.71616
M94	growth factor induced, enriched in nuclear receptor subfamily 4	12	12	0.016303	-0.0726549	0.105261	0.718962
M147	intracellular transport	17	15	0.0151381	-0.0718418	0.102118	0.732551
M15	Ran mediated mitosis	13	13	0.0156476	-0.0747365	0.106032	0.733908
M209	lysosome	10	10	0.0151925	-0.0732198	0.103605	0.73581
M28	antigen presentation (lipids and proteins)	11	11	-0.0146338	-0.100678	0.07141	0.738421
M133.1	cell cell adhesion	11	10	0.0150443	-0.0740687	0.104157	0.740275
M12	CD28 costimulation	10	7	-0.0153059	-0.106094	0.0754824	0.740622
M154.0	amino acid metabolism and transport	33	25	0.0150721	-0.0744768	0.104621	0.741034
M206	Wnt signaling pathway	14	14	0.0150233	-0.0748576	0.104904	0.742761
M97	enriched for SMAD2/3 signaling	10	10	0.0150644	-0.0752662	0.105395	0.743322
S2	B cell surface signature	169	161	0.0148239	-0.0764415	0.106089	0.749779
M203	TBA	13	9	-0.014669	-0.105682	0.0763441	0.751643
M124	enriched in membrane proteins	19	16	0.0142691	-0.0742845	0.102823	0.751702
M4.9	mitotic cell cycle in stimulated CD4 T cells	16	15	0.0142867	-0.0756913	0.104265	0.755215
M204.0	chaperonin mediated protein folding (I)	14	13	-0.0141708	-0.103884	0.0755425	0.756443
M26.2	TBA	14	11	-0.0141851	-0.104889	0.0765183	0.758783
M30	cell movement, Adhesion & Platelet activation	20	18	0.0134139	-0.0738624	0.10069	0.762815
M154.1	transmembrane transport (SLC cluster)	17	16	-0.0140653	-0.105601	0.0774701	0.762867
M89.0	putative targets of PAX3	16	15	-0.0137454	-0.104073	0.0765823	0.765094
S8	Naive B cell surface signature	54	50	0.0128065	-0.0784644	0.104077	0.782922
M202	enriched in extracellular matrix & associated proteins	12	12	0.0123454	-0.0777896	0.10248	0.787975
M1.1	integrin cell surface interactions (II)	12	11	-0.0125182	-0.10433	0.0792938	0.788912
M166	TBA	17	15	-0.0117689	-0.104154	0.080616	0.80248
M176	TBA	10	10	-0.0109529	-0.1007	0.0787941	0.810609
M228	olfactory receptors	13	8	-0.0108848	-0.100978	0.0792087	0.812475
M187	metabolism in mitochondria, peroxisome	12	10	0.0107176	-0.0806884	0.102124	0.817909
M86.0	chemokines and inflammatory molecules in myeloid cells	19	18	0.0101386	-0.0810288	0.101306	0.827143
M85	platelet activation and degranulation	12	11	-0.00986249	-0.100433	0.0807077	0.830686
M172	enriched for TF motif TTCNRGNNNNTTC	10	9	-0.00967068	-0.100122	0.0807802	0.833714
M32.8	cytoskeletal remodeling	10	8	0.00843391	-0.0796518	0.0965196	0.85087
M98.0	TBA	18	16	0.00861199	-0.0829303	0.100154	0.853442
M213	regulation of transcription, transcription factors	21	16	-0.00785958	-0.094746	0.0790269	0.859018
M158.0	interferon alpha response (I)	16	16	0.00802938	-0.0828199	0.0988787	0.862222
M26.1	TBA	22	17	-0.00758268	-0.0978253	0.0826599	0.868949
M137	TBA	16	15	-0.00734484	-0.0968578	0.0821681	0.871998
M189	extracellular region cluster (GO)	16	16	0.00723092	-0.0832864	0.0977482	0.875354
M184.0	TBA	18	16	-0.00703647	-0.0993154	0.0852425	0.880978
M4.4	mitotic cell cycle - DNA replication	30	26	0.00655525	-0.0819775	0.095088	0.884401
M162.1	cell junction	11	9	0.00670592	-0.0843336	0.0977454	0.884996
M193	TBA	11	9	0.0060186	-0.0809361	0.0929733	0.89189
M135.0	enriched in plasma membrane proteins (I)	16	14	0.00609959	-0.0828013	0.0950005	0.892828
M131	TBA	14	13	0.0057883	-0.0823294	0.093906	0.897368
M122	enriched for cell migration	11	11	0.00564808	-0.0842935	0.0955896	0.901862
M41.4	ATF targets network	10	9	-0.00544724	-0.094471	0.0835766	0.904363
M173	erythrocyte differentiation	14	11	0.00497546	-0.0832302	0.0931811	0.911804
M221	TBA	16	10	0.00494275	-0.0852473	0.0951328	0.914302
M22.1	mismatch repair (II)	13	13	-0.00450884	-0.09294	0.0839223	0.92025
S10	Resting dendritic cell surface signature	75	73	0.00469747	-0.0891567	0.0985516	0.921709
M199	platelet activation & blood coagulation	13	11	0.00400179	-0.082997	0.0910006	0.92803
M185	TBA	14	13	0.0039337	-0.0827365	0.0906039	0.928984
M32.2	CORO1A-DEF6 network (I)	20	18	0.00392564	-0.0876033	0.0954545	0.932882
M27.1	chemokine cluster (II)	15	15	0.00380828	-0.0878152	0.0954317	0.934951
S9	Memory B cell surface signature	37	36	-0.00364829	-0.0962923	0.0889957	0.938363
M138	enriched for ubiquitination	11	11	-0.00326307	-0.0924497	0.0859235	0.942727
M177.0	TBA	34	30	-0.00202886	-0.0924406	0.0883829	0.964853
M10.1	E2F1 targets (Q4)	21	21	-0.00191625	-0.0902498	0.0864173	0.966022
M22.0	mismatch repair (I)	27	25	-0.00169091	-0.0926565	0.0892747	0.970883
M135.1	enriched in plasma membrane proteins (II)	15	14	-0.00163563	-0.090507	0.0872358	0.971171
M222	heme biosynthesis (II)	13	10	-0.000987462	-0.0888384	0.0868635	0.982391
M134	Membrane, ER proteins	17	16	-0.00081269	-0.0901448	0.0885194	0.985747
M96	Hox cluster V	10	10	-0.000702404	-0.0873383	0.0859335	0.987298
M174	TBA	24	21	0.000400741	-0.0869609	0.0877624	0.992813
M194	TBA	14	13	-0.000342309	-0.0892448	0.0885601	0.993967
M1.0	integrin cell surface interactions (I)	29	29	0.00033172	-0.0922105	0.092874	0.994384
